# Supplementary material for: Ovarian gene expression in the absence of FIGLA, an oocyte-specific transcription factor
Source: PubMed Central journal article supplement (PMC1906760; doi:10.1186/1471-213x-7-67), 2007-06-13
Supplement: 1471-213X-7-67-S1.pdf [file 1471-213X-7-67-S1.pdf]

**Additional file 1 - NIA microarray: genes potentially up-regulated by FIGLA**

|   | <b>NIA</b> | <b><math>\rho \leq</math></b> | <b>Common</b>  | <b>Genbank</b> | <b>Unigene</b> | <b>Name</b>                                                                       |
|---|------------|-------------------------------|----------------|----------------|----------------|-----------------------------------------------------------------------------------|
|   | H3104H01   | 0.0000                        | C86187         | AA692270       | Mm.22314       | Transcribed locus                                                                 |
|   | H3142B02   | 0.0000                        | Ndufa7         | BQ951360       | Mm.29513       | NADH dehydrogenase (ubiquinone) 1 alpha subcomplex, 7 (B14.5a) (Ndufa7), mRNA     |
|   | H3151D02   | 0.0000                        | data not found | data not found | data not found | data not found                                                                    |
|   | H3151G09   | 0.0000                        | Pcdhga12       | AF464160       | Mm.247203      | Protocadherin gamma subfamily A, 10, mRNA (cDNA clone MGC:40648 IMAGE:5400956)    |
|   | H3087F07   | 0.0000                        | data not found | data not found | data not found | data not found                                                                    |
| ● | H3136A01   | 0.0000                        | Kit            | BC026713       | Mm.247073      | Kit oncogene (Kit), mRNA                                                          |
|   | H3055B02   | 0.0000                        | data not found | data not found | data not found | data not found                                                                    |
| ▶ | H3080G03   | 0.0000                        | C330026N02Rik  | NM_175290      | Mm.315815      | NALP-kappa (Nalp-kappa)                                                           |
|   | H3130A02   | 0.0000                        | data not found | data not found | data not found | data not found                                                                    |
|   | H3134D03   | 0.0000                        | Nmnat3         | BC005737       | Mm.294082      | Nicotinamide nucleotide adenylyltransferase 3 (Nmnat3), mRNA                      |
|   | H3060D08   | 0.0000                        | data not found | data not found | data not found | data not found                                                                    |
|   | H3158G01   | 0.0000                        | data not found | data not found | data not found | data not found                                                                    |
|   | H3128E01   | 0.0000                        | data not found | data not found | data not found | data not found                                                                    |
|   | H3144A01   | 0.0000                        | 4930562C15Rik  | XM_489501      | Mm.325551      | PREDICTED: hypothetical protein LOC78809 [Mus musculus], mRNA sequence            |
|   | H3141C02   | 0.0000                        | AL022943       | BU515331       | Mm.262730      | Transcribed locus                                                                 |
|   | H3130A01   | 0.0000                        | data not found | data not found | data not found | data not found                                                                    |
|   | H3133D07   | 0.0000                        | 4930403J22Rik  | AK033947       | Mm.271988      | RIKEN cDNA 4930403J22 gene, mRNA (cDNA clone MGC:32342 IMAGE:5029461)             |
|   | 553026     | 0.0000                        | Top3b          | AB045324       | Mm.326089      | Topoisomerase (DNA) III beta, mRNA (cDNA clone MGC:30218 IMAGE:5003002)           |
|   | H3067A09   | 0.0000                        | Zdhhc13        | BC046599       | Mm.279116      | Zinc finger, DHHC domain containing 13, mRNA (cDNA clone MGC:54871 IMAGE:6311721) |
|   | H3061F01   | 0.0000                        | 4930562C15Rik  | XM_489501      | Mm.325551      | PREDICTED: hypothetical protein LOC78809 [Mus musculus], mRNA sequence            |
|   | H3051D02   | 0.0000                        | Exo1           | AK028728       | Mm.283046      | Exonuclease 1, mRNA (cDNA clone MGC:5686 IMAGE:3499406)                           |
|   | H3135G08   | 0.0000                        | data not found | BC084590       | Mm.328014      | 1 cell embryo 1 cell cDNA, RIKEN full-length enriched library, clone:I0C0022N05   |
|   | H3128G07   | 0.0000                        | data not found | data not found | data not found | data not found                                                                    |
|   | H3151B06   | 0.0000                        | data not found | data not found | data not found | data not found                                                                    |
|   | H3103D02   | 0.0000                        | BC040823       | BC040823       | Mm.21577       | CDNA sequence BC040823, mRNA (cDNA clone MGC:117552 IMAGE:30933544)               |
| ● | H3157G03   | 0.0000                        | Og2x           | AY061761       | Mm.17715       | OG2 homeobox gene (Og2x), mRNA                                                    |
|   | H3129H12   | 0.0000                        | data not found | data not found | data not found | data not found                                                                    |
|   | H3129D01   | 0.0000                        | data not found | data not found | data not found | data not found                                                                    |
|   | H3051D10   | 0.0000                        | data not found | data not found | data not found | data not found                                                                    |
|   | 720076     | 0.0000                        | data not found | AI464807       | Mm.361796      | Adult male cecum cDNA, RIKEN full-length enriched library,                        |

|   | NIA      | $\rho \leq$ | Common         | Genbank           | Unigene             | Name                                                                                |
|---|----------|-------------|----------------|-------------------|---------------------|-------------------------------------------------------------------------------------|
|   |          |             |                |                   |                     | clone:9130020F13                                                                    |
|   | H3055G11 | 0.0000      | data not found | data not found    | data not found      | data not found                                                                      |
|   | H3082H03 | 0.0000      | Helic1         | XM_125617         | Mm.222497           | Activating signal cointegrator 1 complex subunit 3, mRNA (cDNA clone IMAGE:5321369) |
| ▶ | H3078C06 | 0.0000      | Arhgap20       | NM_175535         | Mm.26150            | Rho GTPase activating protein 20, mRNA (cDNA clone IMAGE:5363167)                   |
|   | H3129H11 | 0.0000      | data not found | data not found    | data not found      | data not found                                                                      |
|   | H3158B05 | 0.0000      | Tes3-ps        | BC024630          | Mm.260975           | Testis derived transcript 3, mRNA (cDNA clone MGC:28191 IMAGE:3988680)              |
|   | H3159F10 | 0.0000      | Dhx40          | AK010512          | Mm.260627           | DEAH (Asp-Glu-Ala-His) box polypeptide 40 (Dhx40), mRNA                             |
| ● | H3138G05 | 0.0000      | Zp2            | M34148            | Mm.6510             | Zona pellucida glycoprotein 2 (Zp2), mRNA                                           |
| ● | H3102C08 | 0.0000      | Zp3            | M20026            | Mm.1381             | Zona pellucida glycoprotein 3 (Zp3), mRNA                                           |
| ▶ | H3028H01 | 0.0000      | Pou5f1         | BC068268          | Mm.17031            | POU domain, class 5, transcription factor 1 (Pou5f1), mRNA                          |
|   | H3151F06 | 0.0000      | Xdh            | NM_011723         | Mm.11223            | Similar to hypothetical protein MGC37588, mRNA (cDNA clone MGC:28125 IMAGE:3980327) |
|   | H3142A06 | 0.0000      | Mphosph6       | BC069961          | Mm.181836           | M phase phosphoprotein 6 (Mphosph6), mRNA                                           |
|   | H3086A06 | 0.0000      | data not found | data not found    | data not found      | data not found                                                                      |
|   | H3145A06 | 0.0000      | Slc30a3        | BC066199          | Mm.1396 Mm.381478   | 13 days embryo brain cDNA, RIKEN full-length enriched library, clone:G630099F21     |
|   | H3073G11 | 0.0000      | data not found | AA822730          | data not found      | data not found                                                                      |
|   | H3080F08 | 0.0000      | data not found | data not found    | data not found      | data not found                                                                      |
|   | H3070B01 | 0.0000      | Zbed3          | BC085478          | Mm.3774             | Zinc finger, BED domain containing 3 (Zbed3), mRNA                                  |
|   | H3085E05 | 0.0000      | 4930487N19Rik  | XM_283206         | Mm.275688           | RIKEN cDNA 4930487N19 gene, mRNA (cDNA clone MGC:63131 IMAGE:3470278)               |
|   | H3010B02 | 0.0000      | data not found | data not found    | data not found      | data not found                                                                      |
|   | 551688   | 0.0000      | Prep           | BC050830          | Mm.37294            | Prolyl endopeptidase, mRNA (cDNA clone MGC:11413 IMAGE:3967219)                     |
|   | H3149H09 | 0.0000      | 1700006H03Rik  | CN834482          | Mm.325325           | PREDICTED: hypothetical protein LOC74174 [Mus musculus], mRNA sequence              |
|   | H3061A04 | 0.0001      | 6720468P15Rik  | AK078497          | Mm.12411            | 0 day neonate thymus cDNA, RIKEN full-length enriched library, clone:A430057M21     |
|   | 585251   | 0.0001      | Cpeb1          | Y08260            | Mm.273122           | Cytoplasmic polyadenylation element binding protein 1 (Cpeb1), mRNA                 |
|   | H3056D08 | 0.0001      | 5830484A20Rik  | BF098849          | Mm.351825 Mm.379676 | PREDICTED: RIKEN cDNA 4930565N07 [Mus musculus],                                    |
|   | H3060B10 | 0.0001      | data not found | data not found    | data not found      | data not found                                                                      |
|   | H3025C02 | 0.0001      | data not found | Multiple clusters | Mm.311913           | RIKEN cDNA 7420416P09 gene (7420416P09Rik), mRNA                                    |
|   | H3156G03 | 0.0001      | 4931419K03Rik  | AK036610          | Mm.235443           | RIKEN cDNA 4931419K03 gene, mRNA (cDNA clone MGC:67711 IMAGE:4035998)               |
|   | H3051G02 | 0.0001      | Cpeb3          | AB093274          | Mm.360051           | Cytoplasmic polyadenylation element binding protein 3 (Cpeb3), mRNA                 |
|   | H3134E07 | 0.0001      | data not found | AK078310          | Mm.300962           | PREDICTED: Mus musculus hypothetical protein LOC (LOC544755),                       |

|   | NIA      | $\rho \leq$ | Common         | Genbank           | Unigene             | Name                                                                                                          |
|---|----------|-------------|----------------|-------------------|---------------------|---------------------------------------------------------------------------------------------------------------|
|   |          |             |                |                   |                     | mRNA                                                                                                          |
| ● | H3099F09 | 0.0001      | Dppa5          | Multiple clusters | Mm.139314 Mm.359437 | Developmental pluripotency associated 5 (Dppa5), mRNA   Transcribed locus                                     |
|   | H3088A09 | 0.0001      | 1700057H21Rik  | BG070503          | Mm.250471           | Transcribed locus                                                                                             |
| ▶ | H3102E07 | 0.0001      | Nalp5          | CO804754          | Mm.11741 Mm.333653  | MATER ( <u>M</u> aternal <u>A</u> ntigen <u>T</u> hat <u>E</u> mbr <span>o</span> yos <u>R</u> equire), NALP5 |
|   | 521770   | 0.0001      | Ctrc           | AI386066          | Mm.308195           | Chymotrypsin C (caldecrin) (Ctrc), mRNA                                                                       |
|   | H3134A10 | 0.0001      | 4930562C15Rik  | XM_489501         | Mm.325551           | PREDICTED: hypothetical protein LOC78809 [Mus musculus], mRNA sequence                                        |
|   | H3046D12 | 0.0001      | data not found | data not found    | data not found      | data not found                                                                                                |
|   | H3035E10 | 0.0001      | data not found | data not found    | data not found      | data not found                                                                                                |
|   | 551381   | 0.0001      | Osbpl8         | NM_175489         | Mm.220204           | Oxysterol binding protein-like 8 (Osbpl8), transcript variant 2, mRNA                                         |
|   | H3051E04 | 0.0001      | data not found | Multiple clusters | data not found      | data not found                                                                                                |
|   | H3152B03 | 0.0001      | Grid2          | AK046841          | data not found      | data not found                                                                                                |
|   | H3019H10 | 0.0001      | Zbtb10         | AK047899          | Mm.103262           | PREDICTED: zinc finger and BTB domain containing 10 [Mus musculus], mRNA sequence                             |
|   | H3108C05 | 0.0001      | data not found | data not found    | data not found      | data not found                                                                                                |
| ▶ | H3046B08 | 0.0001      | C330003B14Rik  | AK049114          | Mm.201536           | RIKEN cDNA C330003B14 gene (C330003B14Rik), mRNA                                                              |
|   | 634968   | 0.0001      | Slc27a2        | BC013442          | Mm.290044           | Solute carrier family 27 (fatty acid transporter), member 2, mRNA (cDNA clone MGC:29967 IMAGE:5123650)        |
|   | 552702   | 0.0001      | data not found | BB505010          | Mm.23581            | Transcribed locus                                                                                             |
|   | H3064C07 | 0.0001      | AI427122       | XM_110660         | Mm.11869            | Expressed sequence AI427122, mRNA (cDNA clone IMAGE:4216549)                                                  |
|   | H3061A05 | 0.0001      | Zbtb10         | AK047899          | Mm.103262           | PREDICTED: zinc finger and BTB domain containing 10 [Mus musculus], mRNA sequence                             |
|   | H3050H08 | 0.0001      | BC031748       | BC031748          | Mm.260106           | CDNA sequence BC031748 (BC031748), mRNA                                                                       |
|   | H3101A03 | 0.0002      | Rnf35          | BC064738          | Mm.28010            | Tripartite motif-containing 61 (Trim61), mRNA                                                                 |
|   | H3114B04 | 0.0002      | Rdx            | BC034438          | Mm.245746           | Radixin (Rdx), mRNA                                                                                           |
|   | 583647   | 0.0002      | Kif14          | XM_355234         | Mm.246505           | PREDICTED: Mus musculus kinesin family member 14 (Kif14), mRNA                                                |
| ▶ | H3075E03 | 0.0002      | E330017A01Rik  | CO814438          | Mm.26145            | RIKEN cDNA E330017A01 gene, mRNA (cDNA clone MGC:117520 IMAGE:30936622)                                       |
|   | H3107D12 | 0.0002      | data not found | data not found    | data not found      | data not found                                                                                                |
|   | H3158G04 | 0.0002      | Stat3          | AK079406          | Mm.249934           | Signal transducer and activator of transcription 3, mRNA (cDNA clone IMAGE:3665873)                           |
|   | H3083D07 | 0.0002      | data not found | data not found    | data not found      | data not found                                                                                                |
|   | H3065G12 | 0.0003      | Epb4.1i5       | AK173198          | Mm.253156           | Erythrocyte protein band 4.1-like 5 (Epb4.1i5), mRNA                                                          |
|   | H3092H04 | 0.0003      | data not found | data not found    | data not found      | data not found                                                                                                |
|   | H3060B07 | 0.0003      | Ndg1           | AY238603          | Mm.26006            | Nur77 downstream gene 1 (Ndg1), mRNA                                                                          |
|   | H3051H08 | 0.0004      | Btg4           | AB050983          | Mm.104932           | B-cell translocation gene 4 (Btg4), mRNA                                                                      |
|   | 551387   | 0.0004      | Tnfaip8        | AK079518          | Mm.27740            | Tumor necrosis factor, alpha-induced protein 8 (Tnfaip8), mRNA                                                |
|   | H3058G06 | 0.0004      | Trpm7          | AY032951          | Mm.244705           | LTRPC7 (Ltrpc7)                                                                                               |

|  | <b>NIA</b> | <b><math>\rho \leq</math></b> | <b>Common</b>  | <b>Genbank</b>    | <b>Unigene</b>      | <b>Name</b>                                                                                   |
|--|------------|-------------------------------|----------------|-------------------|---------------------|-----------------------------------------------------------------------------------------------|
|  | H3064G10   | 0.0004                        | Zbed3          | BC085478          | Mm.3774             | Zinc finger, BED domain containing 3 (Zbed3), mRNA                                            |
|  | 636958     | 0.0004                        | data not found | CK030712          | Mm.337716           | 6 days neonate spleen cDNA, RIKEN full-length enriched library, clone:F430003O07              |
|  | H3135D05   | 0.0004                        | Col9a3         | AK030350          | Mm.141312           | Procollagen, type IX, alpha 3, mRNA (cDNA clone MGC:32160 IMAGE:5003028)                      |
|  | H3040F10   | 0.0005                        | Lmo7           | BC082553          | Mm.218981           | PREDICTED: LIM domain only 7 [Mus musculus], mRNA sequence                                    |
|  | H3089D03   | 0.0005                        | data not found | data not found    | data not found      | data not found                                                                                |
|  | 598513     | 0.0005                        | data not found | Multiple clusters | Mm.326609 Mm.327001 | MRNA expressed in islet cells (clone 43)  Transcribed locus                                   |
|  | H3055E10   | 0.0005                        | data not found | Multiple clusters | Mm.362671 Mm.335592 | PREDICTED: Mus musculus similar to RIKEN cDNA 5830484A20 (LOC545341), mRNA  Transcribed Locus |
|  | H3060D03   | 0.0006                        | D7Ert445e      | BC054740          | Mm.223639           | Phospholipase A2, group IVC (cytosolic, calcium-independent) (Pla2g4c), mRNA                  |
|  | H3069B11   | 0.0006                        | data not found | AU023774          | Mm.354103           | Transcribed locus                                                                             |
|  | H3078D03   | 0.0006                        | Ndr4           | AK090374          | Mm.29846            | N-myc downstream regulated gene 4 (Ndr4), mRNA                                                |
|  | H3135G06   | 0.0006                        | Aof1           | NM_172262         | Mm.31259            | Amine oxidase, flavin containing 1, mRNA (cDNA clone MGC:38211 IMAGE:5323227)                 |
|  | H3081C03   | 0.0006                        | Zbtb10         | AK047899          | Mm.103262           | PREDICTED: zinc finger and BTB domain containing 10 [Mus musculus], mRNA sequence             |
|  | H3152H12   | 0.0008                        | Pard3          | AK053576          | Mm.299254           | Par-3 (partitioning defective 3) homolog (C. elegans) (Pard3), transcript variant 3, mRNA     |
|  | H3078G11   | 0.0008                        | Drd3           | X67274            | Mm.327835           | Dopamine receptor 3 (Drd3), mRNA                                                              |
|  | H3041C12   | 0.0008                        | data not found | data not found    | data not found      | data not found                                                                                |
|  | H3069B10   | 0.0009                        | data not found | data not found    | data not found      | data not found                                                                                |
|  | H3135F10   | 0.0010                        | data not found | XM_356199         | Mm.384700 Mm.17857  | 10 days embryo whole body cDNA, RIKEN full-length enriched library                            |
|  | 338143     | 0.0010                        | 2610020H15Rik  | BC016541          | Mm.281887           | Glycerophosphodiester phosphodiesterase domain containing 1 (Gdp1), mRNA                      |
|  | H3156B04   | 0.0011                        | Chn1           | AK049943          | Mm.257073           | Chimerin (chimaerin) 1, mRNA (cDNA clone MGC:39019 IMAGE:5364554)                             |
|  | H3101A12   | 0.0012                        | Ccrn4l         | U70139            | Mm.86541            | NOCTURNIN (Nocturnin)                                                                         |
|  | H3072H12   | 0.0012                        | E2f5           | AK028856          | Mm.153415           | E2F transcription factor 5, mRNA (cDNA clone MGC:6043 IMAGE:3482306)                          |
|  | H3068H04   | 0.0013                        | LOC235779      | Multiple clusters | Mm.296705 Mm.37128  | Hypothetical LOC235779 (LOC235779), mRNA                                                      |
|  | H3043D08   | 0.0016                        | data not found | BG066474          | Mm.318680           | Transcribed locus                                                                             |
|  | H3110B11   | 0.0016                        | 2900002G04Rik  | XM_136135         | Mm.160079           | PREDICTED: hypothetical protein LOC78283 [Mus musculus], mRNA sequence                        |
|  | H3058B06   | 0.0016                        | data not found | data not found    | data not found      | data not found                                                                                |
|  | 315658     | 0.0016                        | Thedc1         | AK087571          | Mm.13808            | Thioesterase domain containing 1 (Thedc1), mRNA                                               |
|  | H3058B02   | 0.0017                        | Tpd52          | AK032111          | Mm.371590           | Tumor protein D52 (Tpd52), transcript variant 1, mRNA                                         |
|  | H3092D04   | 0.0018                        | data not found | data not found    | data not found      | data not found                                                                                |
|  | 597152     | 0.0018                        | 4930487N19Rik  | XM_283206         | Mm.275688           | RIKEN cDNA 4930487N19 gene, mRNA (cDNA clone MGC:63131                                        |

|   | NIA      | $\rho \leq$ | Common                                    | Genbank           | Unigene             | Name                                                                                                            |
|---|----------|-------------|-------------------------------------------|-------------------|---------------------|-----------------------------------------------------------------------------------------------------------------|
|   |          |             |                                           |                   |                     | IMAGE:3470278)                                                                                                  |
|   | H3071F03 | 0.0018      | Nexn                                      | AK028732          | Mm.200188           | Nexilin (Nexn), mRNA                                                                                            |
|   | H3058H01 | 0.0018      | Oas1c                                     | AK028986          | Mm.43230            | 2'-5'olygoadenylate synthetase 1c (Oas1c) mRNA, Oas1c-RV allele                                                 |
|   | H3071A11 | 0.0019      | E430034L04Rik                             | BC048176          | Mm.290530           | RNA-binding protein isoform G3BP-2a (G3BP2)                                                                     |
|   | 555534   | 0.0022      | Fbxo21                                    | AK049723          | Mm.21912            | F-box only protein 21 (Fbxo21), mRNA                                                                            |
|   | 552704   | 0.0024      | Tor3a                                     | BC052851          | Mm.206737           | Torsin family 3, member A (Tor3a), mRNA                                                                         |
| ▶ | H3154E08 | 0.0024      | Pdzk1                                     | AK029764          | Mm.28015            | Hydrophilic CFTR-binding protein CAP70 (Cap70)                                                                  |
| ▶ | H3087F10 | 0.0024      | Elavl2                                    | AK083865          | Mm.318042           | ELAV (embryonic lethal, abnormal vision, Drosophila)-like 2 (Hu antigen B) (Elavl2), transcript variant 2, mRNA |
| ▶ | H3070F03 | 0.0024      | AU022726                                  | BC066795          | Mm.95244            | NALP-gamma (Nalp-gamma)                                                                                         |
|   | H3158A11 | 0.0025      | Kif16b                                    | Multiple clusters | Mm.251934           | MKIAA1590 protein                                                                                               |
|   | H3137D12 | 0.0025      | Vkorc1                                    | CF585248          | Mm.29703            | Vitamin K epoxide reductase complex, subunit 1, mRNA (cDNA clone MGC:25747 IMAGE:3991412)                       |
|   | H3089D11 | 0.0026      | data not found                            | data not found    | data not found      | data not found                                                                                                  |
|   | H3111B10 | 0.0026      | Ap3b2; Naptb; [b]-NAP; MGC36656; beta-NAP | NM_021492         | Mm.322894           | Adaptor-related protein complex 3, beta 2 subunit, mRNA (cDNA clone IMAGE:5364848)                              |
|   | 571878   | 0.0026      | 4930403J22Rik                             | AK033947          | Mm.271988           | RIKEN cDNA 4930403J22 gene, mRNA (cDNA clone MGC:32342 IMAGE:5029461)                                           |
|   | H3056E12 | 0.0028      | data not found                            | data not found    | data not found      | data not found                                                                                                  |
|   | H3100G04 | 0.0031      | data not found                            | data not found    | data not found      | data not found                                                                                                  |
|   | H3103G12 | 0.0033      | data not found                            | data not found    | data not found      | data not found                                                                                                  |
|   | H3093F04 | 0.0034      | Ddx20                                     | NM_017397         | Mm.272826           | DEAD (Asp-Glu-Ala-Asp) box polypeptide 20 (Ddx20), mRNA                                                         |
|   | H3059H12 | 0.0036      | Gm99                                      | CO810251          | Mm.26881            | Gene model 99, (NCBI), mRNA (cDNA clone MGC:117750 IMAGE:30931566)                                              |
|   | H3101B05 | 0.0038      | 9930116P15Rik                             | XM_127961         | Mm.297862           | PREDICTED: RIKEN cDNA 4930461P20 [Mus musculus], mRNA sequence                                                  |
|   | H3134D06 | 0.0039      | Grpel2                                    | BC068232          | Mm.269657 Mm.322342 | GrpE-like 2, mitochondrial (Grpel2), mRNA                                                                       |
|   | H3070F06 | 0.0056      | Ipmk                                      | BC052463          | Mm.245867           | Inositol polyphosphate multikinase (Ipmk), mRNA                                                                 |
|   | H3093C05 | 0.0056      | data not found                            | data not found    | data not found      | data not found                                                                                                  |
|   | H3076H06 | 0.0059      | Ak4                                       | BC086663          | Mm.42040            | Adenylate kinase 3 alpha-like 1 (Ak3l1), mRNA                                                                   |
|   | H3011D10 | 0.0061      | Lcp1                                      | NM_008879         | Mm.153911           | Lymphocyte cytosolic protein 1, mRNA (cDNA clone MGC:30234 IMAGE:3486993)                                       |
|   | H3038H06 | 0.0062      | Rex2                                      | BC050018          | Mm.379641           | PREDICTED: similar to RIKEN cDNA 6330416L07 gene [Mus musculus], mRNA sequence                                  |
|   | H3027E04 | 0.0063      | Bcat1                                     | AK036309          | Mm.4606             | Branched chain aminotransferase 1, cytosolic (Bcat1), transcript variant 2, mRNA                                |
|   | H3058B10 | 0.0063      | data not found                            | Multiple clusters | Mm.25493 Mm.344708  | Centrin 4 (Cetn4), mRNA                                                                                         |

|   | <b>NIA</b>                               | <b><math>\rho \leq</math></b> | <b>Common</b>  | <b>Genbank</b>    | <b>Unigene</b> | <b>Name</b>                                                                                        |
|---|------------------------------------------|-------------------------------|----------------|-------------------|----------------|----------------------------------------------------------------------------------------------------|
|   | 651495                                   | 0.0067                        | 4930429O20Rik  | AK015245          | Mm.34611       | RIKEN cDNA 4930429O20 gene (4930429O20Rik), mRNA                                                   |
| ▶ | H3064D03                                 | 0.0068                        | E330034G19Rik  | XM_138939         | Mm.2077        | PREDICTED: polymerase (RNA) III (DNA directed) polypeptide A, 155kDa [Mus musculus], mRNA sequence |
|   | 636116                                   | 0.0074                        | Aass           | AK044323          | Mm.18651       | Aminoadipate-semialdehyde synthase, mRNA (cDNA clone MGC:5717 IMAGE:3600654)                       |
|   | 571270                                   | 0.0080                        | Cpeb3          | AB093274          | Mm.360051      | Cytoplasmic polyadenylation element binding protein 3 (Cpeb3), mRNA                                |
|   | 597752                                   | 0.0082                        | Herc3          | AK122192          | Mm.386815      | Hect domain and RLD 3 (Herc3), mRNA                                                                |
|   | H3120D12                                 | 0.0091                        | Zfp313         | BC085146          | Mm.22225       | Zinc-finger protein ZFP313 (Zfp313)                                                                |
|   | 598406                                   | 0.0099                        | Rock1          | U58512            | Mm.6710        | Rho-associated coiled-coil forming kinase 1 (Rock1), mRNA                                          |
|   | H3044A12                                 | 0.0099                        | data not found | data not found    | data not found | data not found                                                                                     |
|   | H3093G05                                 | 0.0117                        | 6230405M12Rik  | AK031754          | Mm.173186      | PREDICTED: Mus musculus RIKEN cDNA C130092O11 gene (C130092O11Rik), mRNA                           |
|   | H3058E02                                 | 0.0117                        | data not found | data not found    | data not found | data not found                                                                                     |
|   | H3159C05                                 | 0.0176                        | Rab3d          | AF263365          | Mm.260157      | RAB3D, member RAS oncogene family, mRNA (cDNA clone MGC:6707 IMAGE:3584902)                        |
|   | H3096F11                                 | 0.0219                        | Chst10         | BC056956          | Mm.260054      | Carbohydrate sulfotransferase 10 (Chst10), mRNA                                                    |
| ▶ | H3084F06                                 | 0.0219                        | E330009P21Rik  | XM_356191         | Mm.235303      | PREDICTED: Mus musculus similar to RIKEN cDNA E330009P21 gene (LOC382106), mRNA                    |
|   | H3051H06                                 | 0.0303                        | data not found | Multiple clusters | Mm.161448      | In vitro fertilized eggs cDNA, RIKEN full-length enriched library, clone:7420404A13                |
|   | H3108C04                                 | 0.0305                        | data not found | data not found    | data not found | data not found                                                                                     |
|   | H3082C04                                 | 0.0355                        | 9030611O19Rik  | BC085288          | Mm.248938      | RIKEN cDNA 9030611O19 gene (9030611O19Rik), mRNA                                                   |
|   | H3001C08                                 | 0.0355                        | data not found | data not found    | data not found | data not found                                                                                     |
|   | H3060H03                                 | 0.0385                        | Tcl1           | BC052336          | Mm.18154       | T-cell lymphoma breakpoint 1 (Tcl1), mRNA                                                          |
| ▶ | H3033B11                                 | 0.0438                        | Serpnb6c       | BC062169          | Mm.272188      | Serine (or cysteine) peptidase inhibitor, clade B, member 6c (Serpnb6c), mRNA                      |
|   |                                          |                               |                |                   |                |                                                                                                    |
| ▶ | Genes highlighted in paper               |                               |                |                   |                |                                                                                                    |
| ● | Previously reported ovary-specific genes |                               |                |                   |                |                                                                                                    |
