# Supplementary material for: Ovarian gene expression in the absence of FIGLA, an oocyte-specific transcription factor
Source: PubMed Central journal article supplement (PMC1906760; doi:10.1186/1471-213x-7-67), 2007-06-13
Supplement: 1471-213X-7-67-S2.pdf [file 1471-213X-7-67-S2.pdf]

**Additional file 2 - NIA microarrays: genes potentially down-regulated by FIGLA**

|   | NIA      | $\rho \leq$ | Symbol         | Genbank           | UniGene                           | Name                                                                                               |
|---|----------|-------------|----------------|-------------------|-----------------------------------|----------------------------------------------------------------------------------------------------|
| ■ | H3154D11 | 0.0002      | Taf7l          | AK017109          | Mm.103259                         | TAF7-like RNA polymerase II, TATA box binding protein (TBP)-associated factor (Taf7l), mRNA        |
|   | H3121A01 | 0.0006      | Ncam2          | AF001286          | Mm.258759                         | Neural cell adhesion molecule 2 (Ncam2), mRNA                                                      |
|   | H3123F10 | 0.0007      | data not found | data not found    | data not found                    | M.musculus DNA for alpha globin gene and flanking regions                                          |
|   | H3124F12 | 0.0017      | data not found | data not found    | data not found                    | data not found                                                                                     |
|   | 427063   | 0.0025      | 2810417M05Rik  | AK014196          | Mm.357108                         | RIKEN cDNA 2810417M05 gene (2810417M05Rik), mRNA                                                   |
| ■ | H3083F09 | 0.0025      | Phtf1          | BC057340          | Mm.378981                         | Putative homeodomain transcription factor 1 (Phtf1), mRNA                                          |
|   | H3045A12 | 0.0028      | Hba-a1         | BF144167          | Mm.196110                         | Hemoglobin alpha, adult chain 1 (Hba-a1), mRNA                                                     |
| ■ | H3091F07 | 0.0032      | Gm1564         | XM_196054         | Mm.297760                         | PREDICTED: similar to FLJ35848 protein [Mus musculus], mRNA sequence                               |
|   | H3113B02 | 0.0040      | 5730411O18Rik  | AK077457          | Mm.260866                         | RIKEN cDNA 5730411O18 gene (5730411O18Rik), mRNA                                                   |
|   | 334924   | 0.0070      | Ilvbl          | BC052054          | Mm.2644                           | IlvB (bacterial acetolactate synthase)-like, mRNA (cDNA clone MGC:67151 IMAGE:5718157)             |
|   | H3118D11 | 0.0095      | data not found | data not found    | data not found                    | data not found                                                                                     |
|   | 604356   | 0.0108      | data not found | Multiple clusters | Mm.8766 Mm.253                    | ESTs, Highly similar to AF157318_1 AD-017 protein [H.sapiens]                                      |
|   | 662847   | 0.0135      | 1110031M08Rik  | XM_355145         | Mm.347805                         | PREDICTED: hypothetical protein LOC68693 [Mus musculus], mRNA sequence                             |
|   | 614363   | 0.0137      | 2810441O16Rik  | Multiple clusters | Mm.316928                         | RNA-binding region (RNP1, RRM) containing 3 (Rnpc3), mRNA                                          |
|   | H3146G12 | 0.0137      | C330046E03     | BC025885          | Mm.326569                         | Transcribed locus                                                                                  |
|   | H3118E11 | 0.0150      | data not found | data not found    | data not found                    | Mouse beta-globin major gene                                                                       |
|   | H3114C08 | 0.0155      | Eraf           | AW107911          | Mm.218857                         | Erythroid associated factor (Eraf), mRNA                                                           |
|   | H3121D10 | 0.0176      | Mrg1           | AK040611          | Mm.247566                         | Myeloid ecotropic viral integration site-related gene 1, mRNA (cDNA clone MGC:13943 IMAGE:4191098) |
| ■ | H3120F02 | 0.0186      | Tia1           | BC027826          | Mm.30849 Mm.333219                | Human polyadenylate binding protein (TIA-1) mRNA, complete cds                                     |
|   | H3087C05 | 0.0201      | data not found | data not found    | data not found                    | data not found                                                                                     |
|   | H3073B09 | 0.0201      | data not found | data not found    | data not found                    | data not found                                                                                     |
|   | H3126B09 | 0.0201      | data not found | data not found    | data not found                    | data not found                                                                                     |
|   | 313981   | 0.0201      | data not found | Multiple clusters | Mm.288567<br>Mm.2444<br>Mm.387214 | hemoglobin, beta adult major chain                                                                 |
|   | H3057H09 | 0.0201      | data not found | data not found    | data not found                    | data not found                                                                                     |
|   | H3134E01 | 0.0201      | Hbb-b1         | BQ044124          | Mm.288567                         | Hemoglobin, beta adult major chain, mRNA (cDNA clone MGC:40691 IMAGE:3988455)                      |
|   | H3157D01 | 0.0201      | Got2           | AK098166          | Mm.230169 Mm.383179               | Glutamate oxaloacetate transaminase 2, mitochondrial (Got2), mRNA                                  |
|   | H3114C04 | 0.0201      | Trim44         | BC039979          | Mm.315002                         | Tripartite motif-containing 44 (Trim44), mRNA                                                      |
|   | H3118G01 | 0.0214      | data not found | data not found    | data not found                    | Mouse gene for beta-1-globin                                                                       |

|   | <b>NIA</b>            | <b><math>\rho \leq</math></b> | <b>Symbol</b>  | <b>Genbank</b> | <b>UniGene</b> | <b>Name</b>                                            |
|---|-----------------------|-------------------------------|----------------|----------------|----------------|--------------------------------------------------------|
|   | H3073B08              | 0.0216                        | data not found | data not found | data not found | data not found                                         |
|   | H3073D08              | 0.0302                        | data not found | data not found | data not found | data not found                                         |
|   | H3061F03              | 0.0302                        | data not found | data not found | data not found | Homo sapiens jagged 1 (Alagille syndrome) (JAG1), mRNA |
|   | H3065F02              | 0.0302                        | A830008O07     | AK081241       | Mm.126450      | Hypothetical protein A830008O07 (A830008O07), mRNA     |
|   | 615776                | 0.0318                        | Ppp2r5e        | NM_012024      | Mm.259626      | MKIAA4006 protein                                      |
|   | H3065A01              | 0.0318                        | data not found | data not found | data not found | Mus musculus exportin 4 (Xpo4-pending), mRNA           |
|   | H3070D08              | 0.0334                        | data not found | data not found | data not found | data not found                                         |
|   | H3056F05              | 0.0334                        | data not found | data not found | data not found | data not found                                         |
|   | H3073C09              | 0.0391                        | data not found | data not found | data not found | data not found                                         |
|   | H3013H08              | 0.0391                        | data not found | data not found | data not found | data not found                                         |
|   |                       |                               |                |                |                |                                                        |
| ■ | Testis-specific genes |                               |                |                |                |                                                        |
