# Supplementary material for: Ovarian gene expression in the absence of FIGLA, an oocyte-specific transcription factor
Source: PubMed Central journal article supplement (PMC1906760; doi:10.1186/1471-213x-7-67), 2007-06-13
Supplement: 1471-213X-7-67-S3.pdf [file 1471-213X-7-67-S3.pdf]

**Additional file 3 - List of primers used for qRT-PCR**

| <b>Name of gene</b> | <b>Forward primer (5'-3')</b> | <b>Reverse primer (5'-3')</b> |
|---------------------|-------------------------------|-------------------------------|
| BC052883            | CTTTGGACCCAGTGAAGAATAAG       | TGTGCTACTTTGGCCTATGGATT       |
| C330003B14Rik       | TGGAGCCACTGAGAAGGTCAA         | AGCCTCCAGGGCCTCAGTAG          |
| E330034G19Rik       | GGGAAGCAGACCCAGAAGAAG         | GTGAATAGGCCCTGATTTTATGGA      |
| E330017A01Rik       | TGAATCAGCCAGGGTTTCAA          | CATGACTGGCAAGAAGGAGACTT       |
| E33000P21Rik        | CCATGTAAATCACTGAAAGCTGTCA     | AGATATCGCCTGCCAAGACAAT        |
| Nalp4a (ita)        | AAGACCAGCTGCAGGGCTTAT         | CACAAACGTGTCAGTCCACATG        |
| Nalp4f (kappa)      | GCCCATGGTTCTTGCATCA           | ATCAGAGGCAGTGTGGAAGCA         |
| Nalp4b              | GAGTGTCTGAAACTGTAGTGCGAAA     | TTTTTGCCACATTCAGATGAGTTTT     |
| Nalp 5 (Mater)      | GCTTCCACAGGCCAATTATCC         | GCTGTGCTCTGCGTTCCAA           |
| Nalp14 (iota)       | CCAGCAGCCACACTGCAAT           | ACAAGCCTTACTCGTGAGAACACA      |
| Oas1d               | TTGGAAGCTAAGGCAGACGAA         | CCTGCCTGCCCATGGA              |
| Serpineb6C          | TCCACCAGGGCTTCCAGTT           | GCGAGTACTGTGTGCCAGTCTT        |
| Arhgap20            | GCCCGATTCCCTTGCAA             | CCCACCGAATACATATACACCAAA      |
| Elavl2              | CATGGCCGCCTCATCATAG           | TTTAACACCAATAAGTGCAAAGGTTT    |
| Pdzk1               | TGCGAGGCTGTGCTGAGA            | TCTGCGGAGTCCGAGCAT            |
| Figla               | CCAAAGAGCGTGAACGGATAA         | TCTTCCAGAACACAGCCGAGT         |
| Pou5f1              | CCAATCAGCTTGGGCTAGAG          | CCTGGGAAAGGTGTCCTGTA          |
| Dppa3               | CTTTGTTGTTCGGTGCTGAAA         | TCCCGTTCAAACCTCATTTC          |
| Oas1h               | GTCCAGAACAGACGTGAACTCC        | TCGATTGTAGGAACCACCCA          |
| Padi6               | TGTTTTCTACCCGGCATCGA          | ATTCACAAGCAGGATGGCTCC         |
| AK087784            | CCAGAGCGATTGACATGAAA          | ATTTCTCACTAGCGGGAGCA          |
| 2410146L05Rik       | AAACGAACTCCAAAGAGCTGTG        | AAAGCCAGCCAGTTTTAGCC          |
| BG074389            | CAGGGAGCTCAGTGCTAAGG          | CGAAAGAGACGAGACCCAAA          |
| AK139812            | ATTCCCTCTGAAGGTGCCAGA         | AGATGGCACACAGAGAGGTGGT        |
| Hprt                | CAGGCCAGACTTTGTTTGGAT         | TTGCGCTCATCTTAGGCTTT          |
| Zp2                 | GGGAAAACCCACCCTCCA            | GCCACAGCACCCAGTGTT            |
| Msy                 | GCACCATTGGAGGGTGATCAACAGC     | GATCCCTTCTTCAACCCATGCTAG      |

Conditions: 95°C 10 min, 95°C 30 sec, 55°C 30 sec, 72°C 30 sec for 40 cycles

Dissociation step: 95°C 30 sec, 60°C 30 sec, 95°C 30 sec for 1 cycle
