# Supplementary material for: Ovarian gene expression in the absence of FIGLA, an oocyte-specific transcription factor
Source: PubMed Central journal article supplement (PMC1906760; doi:10.1186/1471-213x-7-67), 2007-06-13
Supplement: 1471-213X-7-67-S4.pdf [file 1471-213X-7-67-S4.pdf]

**Additional file 4 - Oligonucleotides used for in situ hybridization (5` - 3`)**

|               |                                                  |
|---------------|--------------------------------------------------|
| BC052883      | CTTCCACTTTAGGTTTGCTGATTGATGTCGCGTGGCCCAGGTCACCAA |
| E330034G19rik | TTCCTCCGTTCTTTCTGGATCCTGCTGCTGGGTCTGGGGGTCACT    |
| C330003B14rik | TTCCAGCGGCCCTTGATGCTCCACAGTGCCAATTGATTGCCTTCCGA  |
| E330017A01rik | GGAAAAGTCTCCTTCTTGCCAGTCATGAAACTGTGGGCCATTGCAAAA |
| E330009P21rik | TCCATTCGGGTTCATTGTAGTCTTGCAAAGAGAAACTCGCTACCA    |
