# Supplementary material for: Ovarian gene expression in the absence of FIGLA, an oocyte-specific transcription factor
Source: PubMed Central journal article supplement (PMC1906760; doi:10.1186/1471-213x-7-67), 2007-06-13
Supplement: 1471-213X-7-67-S5.pdf [file 1471-213X-7-67-S5.pdf]

**Additional file 5 – False discovery rate analysis of newborn microarray: genes potentially up-regulated by FIGLA**

|   | <b>NIA</b> | <b><math>\rho \leq</math></b> | <b>Common</b>  | <b>Unigene</b> | <b>Name</b>                                                                         |
|---|------------|-------------------------------|----------------|----------------|-------------------------------------------------------------------------------------|
|   | H3141C02   | 0.0004                        | AL022943       | Mm.262730      | Expressed sequence AL022943                                                         |
|   | H3136A01   | 0.0004                        | Kit            | Mm.247073      | Kit oncogene                                                                        |
|   | H3103D02   | 0.0004                        | Lsm14b         | Mm.21577       | LSM14 homolog B                                                                     |
|   | H3142B02   | 0.0004                        | Ndufa7         | Mm.29513       | NADH dehydrogenase (ubiquinone) 1 alpha subcomplex, 7 (B14.5a)                      |
|   | H3150C01   | 0.0004                        | G3bp2          | Mm.290530      | GTPase activating protein (SH3 domain) binding protein 2                            |
|   | H3158B05   | 0.0004                        | Ippk           | Mm.390586      | Inositol 1,3,4,5,6-pentakisphosphate 2-kinase                                       |
|   | H3151G09   | 0.0004                        | Pcdhgc3        | Mm.247203      | Protocadherin gamma subfamily C, 3                                                  |
|   | H3101A03   | 0.0004                        | Trim61         | Mm.28010       | Tripartite motif-containing 61                                                      |
|   | H3069B11   | 0.0005                        | data not found | Mm.354103      | Transcribed locus                                                                   |
|   | H3067A09   | 0.0005                        | Zdhhc13        | Mm.279116      | Zinc finger, DHHC domain containing 13                                              |
|   | H3152B03   | 0.0005                        | Grid2          | Mm.425327      | Glutamate receptor, ionotropic, delta 2                                             |
|   | H3144A01   | 0.0005                        | 4930562C15Rik  | Mm.325551      | RIKEN cDNA 4930562C15 gene                                                          |
|   | H553026    | 0.0005                        | Top3b          | Mm.326089      | Topoisomerase (DNA) III beta                                                        |
|   | H3070B01   | 0.0005                        | Zbed3          | Mm.3774        | Zinc finger, BED domain containing 3                                                |
|   | H3133D07   | 0.0005                        | Tmtc4          | Mm.271988      | Transmembrane and tetratricopeptide repeat containing 4                             |
|   | H3135G08   | 0.0005                        | AU015836       | Mm.328014      | Expressed sequence AU015836                                                         |
|   | H3080G03   | 0.0005                        | Nlrp4f         | Mm.315815      | NLR family, pyrin domain containing 4F                                              |
|   | H3082H03   | 0.0005                        | Ascc3          | Mm.222497      | Activating signal cointegrator 1 complex subunit 3                                  |
|   | H3104H01   | 0.0005                        | C86187         | Mm.22314       | Expressed sequence C86187                                                           |
|   | H3127E07   | 0.0005                        | Ctnna3         | Mm.244348      | Catenin (cadherin associated protein), alpha 3                                      |
|   | H3058B02   | 0.0005                        | Tpd52          | Mm.371590      | Tumor protein D52                                                                   |
|   | H3134D03   | 0.0005                        | Nmnat3         | Mm.294082      | Nicotinamide nucleotide adenylyltransferase 3                                       |
|   | H551381    | 0.0005                        | Osbpl8         | Mm.220204      | Oxysterol binding protein-like 8                                                    |
| ‡ | H636958    | 0.0006                        | EG626058       | Mm.31556       | Predicted gene, EG626058                                                            |
|   | H3159F10   | 0.0006                        | Dhx40          | Mm.260627      | DEAH (Asp-Glu-Ala-His) box polypeptide 40                                           |
|   | H551688    | 0.0006                        | Prep           | Mm.37294       | Prolyl endopeptidase                                                                |
|   | H3129D01   | 0.0006                        | data not found | Mm.401652      | Transcribed locus, moderately similar to XP_925585.1 hypothetical protein XP_920492 |
|   | H3051D02   | 0.0006                        | Exo1           | Mm.283046      | Exonuclease 1                                                                       |
|   | H3064C07   | 0.0006                        | AI427122       | Mm.11869       | Expressed sequence AI427122                                                         |
|   | H3128G07   | 0.0006                        | data not found | Mm.410520      | Transcribed locus                                                                   |
|   | H3156G03   | 0.0006                        | 4931419K03Rik  | Mm.235443      | RIKEN cDNA 4931419K03 gene                                                          |
|   | H3072G05   | 0.0006                        | Elavl2         | Mm.318042      | ELAV (embryonic lethal, abnormal vision, Drosophila)-like 2 (Hu antigen B)          |
|   | H3059F01   | 0.0006                        | Uchl1          | Mm.29807       | Ubiquitin carboxy-terminal hydrolase L1                                             |
|   | H555534    | 0.0006                        | Fbxo21         | Mm.21912       | F-box protein 21                                                                    |

|   | <b>NIA</b> | <b><math>\rho \leq</math></b> | <b>Common</b>  | <b>Unigene</b> | <b>Name</b>                                                                           |
|---|------------|-------------------------------|----------------|----------------|---------------------------------------------------------------------------------------|
| ‡ | H3134E07   | 0.0007                        | data not found | Mm.300962      | Adult male olfactory brain cDNA, RIKEN full-length enriched library, clone:6430591E23 |
|   | H3131C01   | 0.0007                        | Dsn1           | Mm.25410       | DSN1, MIND kinetochore complex component, homolog                                     |
|   | H585251    | 0.0007                        | Cpeb1          | Mm.273122      | Cytoplasmic polyadenylation element binding protein 1                                 |
|   | H3049G03   | 0.0007                        | D8Ert362e      | Mm.394064      | DNA segment, Chr 8, ERATO Doi 362, expressed                                          |
|   | H720076    | 0.0007                        | data not found | Mm.361796      | Adult male cecum cDNA, RIKEN full-length enriched library, clone:9130020F13           |
|   | H3139B12   | 0.0007                        | Spt1           | Mm.1280        | Salivary protein 1                                                                    |
|   | H3153H08   | 0.0007                        | Hs6st2         | Mm.252561      | Heparan sulfate 6-O-sulfotransferase 2                                                |
|   | H3076E02   | 0.0007                        | C330027C09Rik  | Mm.24491       | RIKEN cDNA C330027C09 gene                                                            |
|   | H3158G04   | 0.0007                        | Stat3          | Mm.249934      | Signal transducer and activator of transcription 3                                    |
|   | H3050H08   | 0.0007                        | BC031748       | Mm.391313      | CDNA sequence BC031748                                                                |
|   | H3101B05   | 0.0007                        | 4930461P20Rik  | Mm.297862      | RIKEN cDNA 4930461P20 gene                                                            |
|   | H3055D02   | 0.0007                        | Aldob          | Mm.218862      | Aldolase 2, B isoform                                                                 |
|   | H620813    | 0.0007                        | Rdx            | Mm.245746      | Radixin                                                                               |
|   | H3078C06   | 0.0008                        | 9230115E21Rik  | Mm.393649      | RIKEN cDNA 9230115E21 gene                                                            |
|   | H3120H01   | 0.0008                        | Prnd           | Mm.180750      | Prion protein dublet                                                                  |
|   | H3066B07   | 0.0008                        | Rfpl4          | Mm.28764       | Ret finger protein-like 4                                                             |
|   | H3022D07   | 0.0008                        | 1810030O07Rik  | Mm.15974       | RIKEN cDNA 1810030O07 gene                                                            |
|   | H3078A01   | 0.0008                        | data not found | Mm.393605      | 8 cells embryo 8 cells cDNA, RIKEN full-length enriched library, clone:E860019P17     |
|   | H3061A05   | 0.0008                        | Zbtb10         | Mm.103262      | Zinc finger and BTB domain containing 10                                              |
|   | H3055G11   | 0.0008                        | fbxo21         | Mm.410455      | Transcribed locus                                                                     |
|   | H3071A09   | 0.0008                        | Spbc25         | Mm.272969      | Spindle pole body component 25 homolog                                                |
|   | H3139C03   | 0.0008                        | Cd9            | Mm.210676      | CD9 antigen                                                                           |
|   | H3096A08   | 0.0008                        | Paqr5          | Mm.273267      | Progesterin and adipoQ receptor family member V                                       |
|   | H3140H01   | 0.0008                        | data not found | Mm.103226      | Transcribed locus, weakly similar to XP_573813.1 similar to envelope protein          |
|   | H3075E03   | 0.0008                        | E330017A01Rik  | Mm.26145       | RIKEN cDNA E330017A01 gene                                                            |
|   | H583647    | 0.0008                        | Kif14          | Mm.384849      | Kinesin family member 14                                                              |
|   | H3110B11   | 0.0008                        | 2900002G04Rik  | Mm.160079      | RIKEN cDNA 2900002G04 gene                                                            |
|   | H3040F10   | 0.0008                        | Lmo7           | Mm.393651      | LIM domain only 7                                                                     |
|   | H3151F06   | 0.0008                        | Xdh            | Mm.11223       | Xanthine dehydrogenase                                                                |
|   | H3040G07   | 0.0008                        | Anxa7          | Mm.280231      | Annexin A7                                                                            |
|   | H3068F02   | 0.0009                        | Spg3a          | Mm.386814      | Spastic paraplegia 3A homolog                                                         |
|   | H3062A08   | 0.0009                        | data not found | Mm.394733      | Transcribed locus                                                                     |
|   | H3059B02   | 0.0009                        | Rgs12          | Mm.196208      | Regulator of G-protein signaling 12                                                   |
|   | H575895    | 0.0009                        | 2010301N04Rik  | Mm.31770       | RIKEN cDNA 2010301N04 gene                                                            |
|   | H3060B08   | 0.0009                        | 2700059D21Rik  | Mm.389532      | RIKEN cDNA 2700059D21 gene                                                            |
|   | H3025C02   | 0.0009                        | 7420416P09Rik  | Mm.311913      | RIKEN cDNA 7420416P09 gene                                                            |

|   | <b>NIA</b> | <b><math>\rho \leq</math></b> | <b>Common</b>  | <b>Unigene</b> | <b>Name</b>                                                        |
|---|------------|-------------------------------|----------------|----------------|--------------------------------------------------------------------|
|   | H3060F01   | 0.0009                        | Xlr3b          | Mm.379042      | X-linked lymphocyte-regulated 3B                                   |
|   | H3058E02   | 0.0010                        | data not found | Mm.390234      | Transcribed locus                                                  |
|   | H552702    | 0.0010                        | Acot3          | Mm.202331      | Acyl-CoA thioesterase 3                                            |
|   | H3071A04   | 0.0010                        | data not found | Mm.410475      | Transcribed locus                                                  |
| ‡ | H3138G05   | 0.0010                        | Zp2            | Mm.6510        | Zona pellucida glycoprotein 2                                      |
|   | H3133E07   | 0.0011                        | Gatm           | Mm.29975       | Glycine amidinotransferase (L-arginine:glycine amidinotransferase) |
|   | H3052B10   | 0.0011                        | 2210009G21Rik  | Mm.330612      | RIKEN cDNA 2210009G21 gene                                         |
|   | H521770    | 0.0011                        | Ctrc           | Mm.45316       | Chymotrypsin C (caldecrin)                                         |
|   | H3056F01   | 0.0011                        | Gdf9           | Mm.9714        | Growth differentiation factor 9                                    |
|   | H3105B01   | 0.0011                        | Sms            | Mm.18652       | Spermine synthase                                                  |
|   | H3061A04   | 0.0011                        | 6720468P15Rik  | Mm.12411       | RIKEN cDNA 6720468P15 gene                                         |
|   | H3047C05   | 0.0011                        | Ccdc123        | Mm.133263      | Coiled-coil domain containing 123                                  |
|   | H3137H03   | 0.0011                        | Mcm2           | Mm.16711       | Minichromosome maintenance deficient 2 mitotin+E129                |
|   | H3152D10   | 0.0011                        | Mat2b          | Mm.293771      | Methionine adenosyltransferase II, beta                            |
|   | H3085C10   | 0.0012                        | Zfp238         | Mm.330700      | Zinc finger protein 238                                            |
|   | H3051E04   | 0.0012                        | data not found | Mm.410451      | Transcribed locus                                                  |
|   | H3149H09   | 0.0012                        | 1700006H03Rik  | Mm.325325      | RIKEN cDNA 1700006H03 gene                                         |
|   | H3123E01   | 0.0012                        | Syce2          | Mm.229128      | Synaptonemal complex central element protein 2                     |
|   | H3130G08   | 0.0012                        | Prdm4          | Mm.25307       | PR domain containing 4                                             |
|   | H3135D05   | 0.0013                        | Col9a3         | Mm.141312      | Procollagen, type IX, alpha 3                                      |
|   | H3142A06   | 0.0013                        | Mphosph6       | Mm.181836      | M phase phosphoprotein 6                                           |
|   | H3060B07   | 0.0013                        | Ndg1           | Mm.26006       | Nur77 downstream gene 1                                            |
|   | H3001D07   | 0.0013                        | B230333C21Rik  | Mm.116704      | RIKEN cDNA B230333C21 gene                                         |
|   | H3099F09   | 0.0013                        | Dppa5          | Mm.139314      | Developmental pluripotency associated 5                            |
|   | H3079D05   | 0.0014                        | Suv420h2       | Mm.247844      | Suppressor of variegation 4-20 homolog 2                           |
|   | H3033C02   | 0.0014                        | Plk4           | Mm.3794        | Polo-like kinase 4                                                 |
|   | H3051G02   | 0.0014                        | Cpeb3          | Mm.391176      | Cytoplasmic polyadenylation element binding protein 3              |
|   | H3121G07   | 0.0014                        | Rif1           | Mm.254530      | Rap1 interacting factor 1 homolog                                  |
|   | H634968    | 0.0014                        | Slc27a2        | Mm.290044      | Solute carrier family 27 (fatty acid transporter), member 2        |
|   | H3074F02   | 0.0014                        | Atp11b         | Mm.239416      | ATPase, Class VI, type 11B                                         |
|   | H3063H01   | 0.0014                        | Tbc1d15        | Mm.432177      | TBC1 domain family, member 15                                      |
|   | H3058G08   | 0.0015                        | Nexn           | Mm.200188      | Nexilin                                                            |
|   | H3102C08   | 0.0015                        | Zp3            | Mm.1381        | Zona pellucida glycoprotein 3                                      |
|   | H596497    | 0.0015                        | data not found | Mm.260106      | Transcribed locus                                                  |
|   | H636897    | 0.0015                        | D030056L22Rik  | Mm.28101       | RIKEN cDNA D030056L22 gene                                         |
|   | H3148A01   | 0.0016                        | Sdc2           | Mm.234266      | Syndecan 2                                                         |

|  | <b>NIA</b> | <b><math>\rho \leq</math></b> | <b>Common</b>  | <b>Unigene</b> | <b>Name</b>                                                            |
|--|------------|-------------------------------|----------------|----------------|------------------------------------------------------------------------|
|  | H3110C01   | 0.0016                        | Epb4.1l4b      | Mm.28217       | Erythrocyte protein band 4.1-like 4b                                   |
|  | H582411    | 0.0016                        | Pigf           | Mm.219685      | Phosphatidylinositol glycan anchor biosynthesis, class F               |
|  | H598406    | 0.0016                        | Rock1          | Mm.6710        | Rho-associated coiled-coil containing protein kinase 1                 |
|  | H3059C11   | 0.0016                        | data not found | Mm.366840      | Transcribed locus, weakly similar to XP_577160.1 similar to LRRGT00088 |
|  | H3010B02   | 0.0016                        | Mertk          | Mm.239655      | C-mer proto-oncogene tyrosine kinase                                   |
|  | H3103G12   | 0.0016                        | Tle4           | Mm.103638      | Transducin-like enhancer of split 4                                    |
|  | H3068E02   | 0.0016                        | Zcrb1          | Mm.293181      | Zinc finger CCHC-type and RNA binding motif 1                          |
|  | H3072H12   | 0.0016                        | E2f5           | Mm.153415      | E2F transcription factor 5                                             |
|  | H3084A08   | 0.0016                        | 4921517N04Rik  | Mm.276415      | RIKEN cDNA 4921517N04 gene                                             |
|  | H3043D08   | 0.0016                        | C79562         | Mm.318680      | Expressed sequence C79562                                              |
|  | H3063H02   | 0.0016                        | Wwc2           | Mm.235074      | WW, C2 and coiled-coil domain containing 2                             |
|  | H636540    | 0.0016                        | Jag1           | Mm.22398       | Jagged 1                                                               |
|  | H3083D07   | 0.0017                        | D5Ert615e      | Mm.394707      | DNA segment, Chr 5, ERATO Doi 615, expressed                           |
|  | H3159E02   | 0.0017                        | Marveld2       | Mm.25300       | MARVEL (membrane-associating) domain containing 2                      |
|  | H3078D03   | 0.0017                        | Ndr4           | Mm.29846       | N-myc downstream regulated gene 4                                      |
|  | H3136E03   | 0.0017                        | Wdr36          | Mm.38816       | WD repeat domain 36                                                    |
|  | H3159D01   | 0.0017                        | Wee1           | Mm.287173      | Wee 1 homolog (S. pombe)                                               |
|  | H3027E04   | 0.0017                        | Bcat1          | Mm.4606        | Branched chain aminotransferase 1, cytosolic                           |
|  | H3029B11   | 0.0018                        | Hmga1          | Mm.4438        | High mobility group AT-hook 1                                          |
|  | H3068B03   | 0.0018                        | AU023525       | Mm.394898      | Expressed sequence AU023525                                            |
|  | H619810    | 0.0018                        | Lancl2         | Mm.274904      | LanC (bacterial lantibiotic synthetase component C)-like 2             |
|  | H3107H03   | 0.0018                        | C330008K14Rik  | Mm.30649       | RIKEN cDNA C330008K14 gene                                             |
|  | H3055H09   | 0.0018                        | D15Ert466e     | Mm.387118      | DNA segment, Chr 15, ERATO Doi 466, expressed                          |
|  | H3093G05   | 0.0018                        | C130092O11Rik  | Mm.376946      | RIKEN cDNA C130092O11 gene                                             |
|  | H3158A11   | 0.0018                        | Kif16b         | Mm.251934      | Kinesin family member 16B                                              |
|  | H315658    | 0.0019                        | Olah           | Mm.13808       | Oleoyl-ACP hydrolase                                                   |
|  | H3060A01   | 0.0019                        | Fam18b         | Mm.9806        | Family with sequence similarity 18, member B                           |
|  | H3091C02   | 0.0019                        | Rex2           | Mm.327224      | Reduced expression 2                                                   |
|  | H3113G05   | 0.0019                        | Ypel5          | Mm.277533      | Yippee-like 5                                                          |
|  | H3052A09   | 0.0019                        | E330034G19Rik  | Mm.2077        | RIKEN cDNA E330034G19 gene                                             |
|  | H3035G08   | 0.0019                        | Hira           | Mm.15694       | Histone cell cycle regulation defective homolog A+E183                 |
|  | H3046B08   | 0.0019                        | Anxa11         | Mm.294083      | Annexin A11                                                            |
|  | H3071C04   | 0.0020                        | Camta1         | Mm.318846      | Calmodulin binding transcription activator 1                           |
|  | H3083G08   | 0.0020                        | Rbm35a         | Mm.387719      | RNA binding motif protein 35A                                          |
|  | H3086C04   | 0.0021                        | 4933426K21Rik  | Mm.277939      | RIKEN cDNA 4933426K21 gene                                             |
|  | H3033B11   | 0.0021                        | Serpib6c       | Mm.272188      | Serine (or cysteine) peptidase inhibitor, clade B, member 6c           |

|  | <b>NIA</b> | <b><math>\rho \leq</math></b> | <b>Common</b>  | <b>Unigene</b> | <b>Name</b>                                                                  |
|--|------------|-------------------------------|----------------|----------------|------------------------------------------------------------------------------|
|  | H3119G10   | 0.0021                        | 6330577E15Rik  | Mm.181610      | RIKEN cDNA 6330577E15 gene                                                   |
|  | H3024G07   | 0.0021                        | Mycl1          | Mm.1055        | V-myc myelocytomatosis viral oncogene homolog 1, lung carcinoma derived+E364 |
|  | H651495    | 0.0021                        | Tmem81         | Mm.34611       | Transmembrane protein 81                                                     |
|  | H3139B09   | 0.0021                        | E130308A19Rik  | Mm.45688       | RIKEN cDNA E130308A19 gene                                                   |
|  | H3144G07   | 0.0021                        | Ovol1          | Mm.280225      | OVO homolog-like 1                                                           |
|  | H3135G03   | 0.0021                        | Serpib6a       | Mm.252210      | Serine (or cysteine) peptidase inhibitor, clade B, member 6a                 |
|  | H3054G01   | 0.0022                        | data not found | Mm.394349      | Transcribed locus                                                            |
|  | H3084E01   | 0.0023                        | Itga2b         | Mm.311110      | Integrin alpha 2b                                                            |
|  | H3100F07   | 0.0023                        | Tacc3          | Mm.379024      | Transforming, acidic coiled-coil containing protein 3                        |
|  | H3065B08   | 0.0024                        | Rnf141         | Mm.96867       | Ring finger protein 141                                                      |
|  | H3025A04   | 0.0024                        | 1110007M04Rik  | Mm.204831      | RIKEN cDNA 1110007M04 gene                                                   |
|  | H3079H08   | 0.0024                        | Gpd1l          | Mm.38198       | Glycerol-3-phosphate dehydrogenase 1-like                                    |
|  | H3147G09   | 0.0024                        | data not found | Mm.315593      | Nonagouti                                                                    |
|  | H367569    | 0.0025                        | Otud5          | Mm.142827      | OTU domain containing 5                                                      |
|  | H3065C08   | 0.0025                        | Ppp3cb         | Mm.274432      | Protein phosphatase 3, catalytic subunit, beta isoform                       |
|  | H3117C02   | 0.0025                        | Nusap1         | Mm.290015      | Nucleolar and spindle associated protein 1                                   |
|  | H3011D10   | 0.0026                        | Lcp1           | Mm.153911      | Lymphocyte cytosolic protein 1                                               |
|  | H3090E01   | 0.0026                        | Wdr5           | Mm.28265       | WD repeat domain 5                                                           |
|  | H597152    | 0.0026                        | Nat12          | Mm.275688      | N-acetyltransferase 12                                                       |
|  | H3110E03   | 0.0026                        | Pgm2l1         | Mm.57225       | Phosphoglucomutase 2-like 1                                                  |
|  | H3057D08   | 0.0026                        | Shcbp1         | Mm.37801       | Shc SH2-domain binding protein 1                                             |
|  | H3016B05   | 0.0027                        | Adss           | Mm.338021      | Adenylosuccinate synthetase, non muscle                                      |
|  | H477236    | 0.0027                        | Wasl           | Mm.1574        | Wiskott-Aldrich syndrome-like                                                |
|  | H3086H01   | 0.0027                        | Necap1         | Mm.288114      | NECAP endocytosis associated 1                                               |
|  | H3011B11   | 0.0028                        | Tex2           | Mm.102407      | Testis expressed gene 2                                                      |
|  | H3154E01   | 0.0028                        | Rad50          | Mm.4888        | RAD50 homolog                                                                |
|  | H597752    | 0.0028                        | Herc3          | Mm.191892      | Hect domain and RLD 3                                                        |
|  | H3146F03   | 0.0029                        | 5530401J07Rik  | Mm.392614      | RIKEN cDNA 5530401J07 gene                                                   |
|  | H3146A01   | 0.0029                        | Rnf7           | Mm.28235       | Ring finger protein 7                                                        |
|  | H3143G02   | 0.0030                        | Mrpl24         | Mm.196635      | Mitochondrial ribosomal protein L24                                          |
|  | H3046F10   | 0.0031                        | Rnf8           | Mm.305994      | Ring finger protein 8                                                        |
|  | H3088C10   | 0.0031                        | Cks2           | Mm.222228      | CDC28 protein kinase regulatory subunit 2                                    |
|  | H3149F01   | 0.0031                        | Wdr47          | Mm.285968      | WD repeat domain 47                                                          |
|  | H3078F01   | 0.0032                        | Trim75         | Mm.334557      | Tripartite motif-containing 75                                               |
|  | H3068B07   | 0.0032                        | Zc3h6          | Mm.26377       | Zinc finger CCCH type containing 6                                           |
|  | H3093C05   | 0.0032                        | Glra4          | Mm.215168      | Glycine receptor, alpha 4 subunit                                            |

|  | <b>NIA</b> | <b><math>\rho \leq</math></b> | <b>Common</b> | <b>Unigene</b> | <b>Name</b>                                                                 |
|--|------------|-------------------------------|---------------|----------------|-----------------------------------------------------------------------------|
|  | H3100D02   | 0.0032                        | Tram1         | Mm.28765       | Translocating chain-associating membrane protein 1                          |
|  | H3092H10   | 0.0034                        | Gyg           | Mm.6375        | Glycogenin                                                                  |
|  | H3146G01   | 0.0034                        | Tfdp1         | Mm.925         | Transcription factor Dp 1                                                   |
|  | H3101D01   | 0.0034                        | Cep70         | Mm.288739      | Centrosomal protein 70                                                      |
|  | H617607    | 0.0034                        | E330009J07Rik | Mm.333006      | RIKEN cDNA E330009J07 gene                                                  |
|  | H3058B06   | 0.0035                        | C87487        | Mm.394376      | Expressed sequence C87487                                                   |
|  | H3083E11   | 0.0035                        | 1700022F17Rik | Mm.310284      | RIKEN cDNA 1700022F17 gene                                                  |
|  | H3053E01   | 0.0035                        | Sart2         | Mm.34557       | Squamous cell carcinoma antigen recognized by T cells 2                     |
|  | H3145B08   | 0.0035                        | Ung2          | Mm.25457       | Uracil DNA glycosylase 2                                                    |
|  | H518698    | 0.0035                        | Dcun1d1       | Mm.379305      | DCUN1D1 DCN1, defective in cullin neddylation 1, domain containing 1        |
|  | H3085H07   | 0.0035                        | Vps26a        | Mm.260703      | Vacuolar protein sorting 26 homolog A                                       |
|  | H3081G02   | 0.0035                        | Tmem41b       | Mm.43212       | Transmembrane protein 41B                                                   |
|  | H3025B04   | 0.0035                        | Actr10        | Mm.29317       | ARP10 actin-related protein 10 homolog                                      |
|  | H3145A06   | 0.0035                        | Slc30a3       | Mm.1396        | Solute carrier family 30 (zinc transporter), member 3                       |
|  | H3100C02   | 0.0036                        | Klhl8         | Mm.179871      | Kelch-like 8                                                                |
|  | H3033E08   | 0.0036                        | Nedd4l        | Mm.98668       | Neural precursor cell expressed, developmentally down-regulated gene 4-like |
|  | H3070F07   | 0.0037                        | Lpp           | Mm.391933      | LIM domain containing preferred translocation partner in lipoma             |
|  | H3102E07   | 0.0037                        | Nlrp5         | Mm.333653      | NLR family, pyrin domain containing 5                                       |
|  | H3092H04   | 0.0038                        | Nhej1         | Mm.335937      | Nonhomologous end-joining factor 1                                          |
|  | H3087E08   | 0.0038                        | A030007L17Rik | Mm.294708      | RIKEN cDNA A030007L17 gene                                                  |
|  | H3028H03   | 0.0038                        | Psip1         | Mm.271985      | PC4 and SFRS1 interacting protein 1                                         |
|  | H3083B01   | 0.0038                        | Ube4b         | Mm.405832      | Ubiquitination factor E4B, UFD2 homolog+E156                                |
|  | H3090G01   | 0.0038                        | 1110067D22Rik | Mm.76694       | RIKEN cDNA 1110067D22 gene                                                  |
|  | H3116H07   | 0.0038                        | A530047J11Rik | Mm.34175       | RIKEN cDNA A530047J11 gene                                                  |
|  | H3121H04   | 0.0038                        | Pes1          | Mm.28659       | Pescadillo homolog 1, containing BRCT domain                                |
|  | H3061E11   | 0.0039                        | Pfdn4         | Mm.28808       | Prefoldin 4                                                                 |
|  | H402976    | 0.0039                        | Tbc1d1        | Mm.286353      | TBC1 domain family, member 1                                                |
|  | H3109A01   | 0.0039                        | Phf8          | Mm.17156       | PHD finger protein 8                                                        |
|  | H3085C12   | 0.0039                        | 1810015C04Rik | Mm.25311       | RIKEN cDNA 1810015C04 gene                                                  |
|  | H3152H12   | 0.0039                        | Pard3         | Mm.299254      | Par-3 (partitioning defective 3) homolog                                    |
|  | H3085E01   | 0.0039                        | Mier3         | Mm.31012       | Mesoderm induction early response 1, family member 3                        |
|  | H3054H08   | 0.0040                        | Hddc3         | Mm.21171       | HD domain containing 3                                                      |
|  | H3154E08   | 0.0040                        | Pdzk1         | Mm.28015       | PDZ domain containing 1                                                     |
|  | H3083A03   | 0.0042                        | 1700029F09Rik | Mm.348017      | RIKEN cDNA 1700029F09 gene                                                  |
|  | H3137D12   | 0.0042                        | Vkorc1        | Mm.29703       | Vitamin K epoxide reductase complex, subunit 1                              |
|  | H3084G04   | 0.0042                        | Smg6          | Mm.288460      | Smg-6 homolog, nonsense mediated mRNA decay factor                          |

|   | <b>NIA</b> | <b><math>\rho \leq</math></b> | <b>Common</b>  | <b>Unigene</b> | <b>Name</b>                                                           |
|---|------------|-------------------------------|----------------|----------------|-----------------------------------------------------------------------|
|   | H3132C07   | 0.0042                        | Chfr           | Mm.30264       | Checkpoint with forkhead and ring finger domains                      |
|   | H3136C07   | 0.0042                        | Bnip3          | Mm.378890      | BCL2/adenovirus E1B interacting protein 1, NIP3                       |
|   | H3123C03   | 0.0042                        | Clock          | Mm.3552        | Circadian locomoter output cycles kaput                               |
|   | H3112D07   | 0.0043                        | Dusp14         | Mm.240885      | Dual specificity phosphatase 14                                       |
|   | H3060D03   | 0.0044                        | Pla2g4c        | Mm.223639      | Phospholipase A2, group IVC (cytosolic, calcium-independent)          |
|   | H3083A09   | 0.0044                        | Rbm26          | Mm.291542      | RNA binding motif protein 26                                          |
|   | H3135G06   | 0.0045                        | Aof1           | Mm.31259       | Amine oxidase, flavin containing 1                                    |
|   | H3033D02   | 0.0045                        | Phf12          | Mm.274329      | PHD finger protein 12                                                 |
|   | H3024A07   | 0.0045                        | Ube2c          | Mm.89830       | Ubiquitin-conjugating enzyme E2C                                      |
|   | H3113F01   | 0.0045                        | Nat13          | Mm.278726      | N-acetyltransferase 13                                                |
|   | H3080A01   | 0.0046                        | Ccdc112        | Mm.329416      | Coiled-coil domain containing 112                                     |
|   | H400526    | 0.0046                        | 1110018M03Rik  | Mm.291809      | RIKEN cDNA 1110018M03 gene                                            |
|   | H3039H01   | 0.0046                        | Cnn2           | Mm.157770      | Calponin 2                                                            |
|   | H3107A05   | 0.0047                        | Baiap2l1       | Mm.18814       | BAI1-associated protein 2-like 1                                      |
|   | H3066G07   | 0.0047                        | Thrap6         | Mm.195562      | Thyroid hormone receptor associated protein 6                         |
|   | H598317    | 0.0048                        | Itpr1          | Mm.227912      | Inositol 1,4,5-triphosphate receptor 1                                |
| ‡ | H3075A04   | 0.0048                        | Padi6          | Mm.271661      | Peptidyl arginine deiminase, type VI                                  |
|   | H3146E01   | 0.0048                        | Rpa2           | Mm.2870        | Replication protein A2                                                |
|   | H3032G01   | 0.0048                        | data not found | Mm.392817      | Transcribed locus, weakly similar to NP_983802.1                      |
|   | H3090G02   | 0.0049                        | Csde1          | Mm.277713      | Cold shock domain containing E1, RNA binding                          |
|   | H3058H01   | 0.0050                        | Oas1c          | Mm.43230       | 2'-5' oligoadenylate synthetase 1C                                    |
|   | H3148D05   | 0.0050                        | Dcn            | Mm.56769       | Decorin                                                               |
|   | H3094A03   | 0.0050                        | Epn2           | Mm.139695      | Epsin 2                                                               |
|   | H3049F01   | 0.0050                        | Fancm          | Mm.374847      | Fanconi anemia, complementation group M                               |
|   | H3016G07   | 0.0051                        | Mllt4          | Mm.59167       | Myeloid/lymphoid or mixed lineage-leukemia translocation to 4 homolog |
|   | H3058G06   | 0.0052                        | Trpm7          | Mm.244705      | Transient receptor potential cation channel, subfamily M, member 7    |
|   | H3053H07   | 0.0052                        | Eef2k          | Mm.25997       | Eukaryotic elongation factor-2 kinase                                 |
|   | H3082G08   | 0.0052                        | Myo10          | Mm.60590       | Myosin X                                                              |
|   | H3116D03   | 0.0052                        | Rad51          | Mm.434303      | RAD51 homolog+E199                                                    |
|   | H3004B11   | 0.0052                        | Sh3bgrl2       | Mm.100125      | SH3 domain binding glutamic acid-rich protein like 2                  |
|   | H3004E10   | 0.0052                        | Suc1g2         | Mm.371585      | Succinate-Coenzyme A ligase, GDP-forming, beta subunit                |
|   | H3008G08   | 0.0052                        | Ttc33          | Mm.254979      | Tetratricopeptide repeat domain 33                                    |
|   | H3101C02   | 0.0052                        | Ube2t          | Mm.284587      | Ubiquitin-conjugating enzyme E2T (putative)                           |
| ‡ | H3028H01   | 0.0052                        | Pou5f1         | Mm.17031       | POU domain, class 5, transcription factor 1                           |
|   | H3137A01   | 0.0053                        | Tlk2           | Mm.126976      | Tousled-like kinase 2 (Arabidopsis)                                   |
|   | H3114E05   | 0.0055                        | 2410127L17Rik  | Mm.29592       | RIKEN cDNA 2410127L17 gene                                            |

|  | <b>NIA</b> | <b><math>\rho \leq</math></b> | <b>Common</b>  | <b>Unigene</b> | <b>Name</b>                                                     |
|--|------------|-------------------------------|----------------|----------------|-----------------------------------------------------------------|
|  | H3108E02   | 0.0055                        | Mapk6          | Mm.18856       | Mitogen-activated protein kinase 6                              |
|  | H3159C02   | 0.0055                        | Tle6           | Mm.206764      | Transducin-like enhancer of split 6                             |
|  | H3151C02   | 0.0056                        | Phc1           | Mm.6822        | Polyhomeotic-like 1                                             |
|  | H3051H08   | 0.0058                        | Btg4           | Mm.431317      | B-cell translocation gene 4                                     |
|  | H552704    | 0.0058                        | Tor3a          | Mm.206737      | Torsin family 3, member A                                       |
|  | H3092B11   | 0.0058                        | Ralbp1         | Mm.17009       | RalA binding protein 1                                          |
|  | H602659    | 0.0058                        | 1200011O22Rik  | Mm.425292      | RIKEN cDNA 1200011O22 gene                                      |
|  | H3074B09   | 0.0059                        | Dcp1a          | Mm.28733       | Decapping enzyme                                                |
|  | H3120D12   | 0.0059                        | Zfp313         | Mm.22225       | Zinc finger protein 313                                         |
|  | H3056E12   | 0.0060                        | data not found | Mm.400434      | Transcribed locus                                               |
|  | H3014D08   | 0.0061                        | Igf2bp2        | Mm.294740      | Insulin-like growth factor 2 mRNA binding protein 2             |
|  | H3113E01   | 0.0061                        | Cdc23          | Mm.196638      | CDC23                                                           |
|  | H367250    | 0.0061                        | Sohlh2         | Mm.25514       | Spermatogenesis and oogenesis specific basic helix-loop-helix 2 |
|  | H403917    | 0.0061                        | LOC329427      | Mm.434022      | Hypothetical protein LOC329427                                  |
|  | H3079C07   | 0.0061                        | Rhpn2          | Mm.286600      | Rhopilin, Rho GTPase binding protein 2                          |
|  | H583397    | 0.0061                        | Rpa3           | Mm.29073       | Replication protein A3                                          |
|  | H3076H06   | 0.0063                        | Ak311          | Mm.42040       | Adenylate kinase 3 alpha-like 1                                 |
|  | H3027C03   | 0.0063                        | Cops3          | Mm.40          | COP9 (constitutive photomorphogenic) homolog, subunit 3         |
|  | H3089E03   | 0.0064                        | Rrm2b          | Mm.24738       | Ribonucleotide reductase M2 B (TP53 inducible)                  |
|  | H3083F03   | 0.0064                        | Tmem87b        | Mm.259688      | Transmembrane protein 87B                                       |
|  | H3126D02   | 0.0064                        | Tmem57         | Mm.99793       | Transmembrane protein 57                                        |
|  | H3074G01   | 0.0065                        | Dnaja3         | Mm.325524      | DnaJ (Hsp40) homolog, subfamily A, member 3                     |
|  | H3152H02   | 0.0065                        | Tbc1d20        | Mm.288733      | TBC1 domain family, member 20                                   |
|  | H551410    | 0.0067                        | Mcpt4          | Mm.266575      | Mast cell protease 4                                            |
|  | H3055A01   | 0.0067                        | data not found | Mm.432968      | Transcribed locus                                               |
|  | H3031D01   | 0.0068                        | Orc1l          | Mm.294154      | Origin recognition complex, subunit 1-like                      |
|  | H3042B08   | 0.0069                        | Chek1          | Mm.16753       | Checkpoint kinase 1 homolog                                     |
|  | H3133C04   | 0.0070                        | Ptk2           | Mm.254494      | PTK2 protein tyrosine kinase 2                                  |
|  | H480618    | 0.0070                        | Crsp2          | Mm.17616       | Cofactor required for Sp1 transcriptional activation, subunit 2 |
|  | H3099D10   | 0.0071                        | BC049349       | Mm.334607      | CDNA sequence BC049349                                          |
|  | H3113G01   | 0.0071                        | D12Erd551e     | Mm.273755      | DNA segment, Chr 12, ERATO Doi 551, expressed                   |
|  | H3103B07   | 0.0071                        | Bnip3l         | Mm.29820       | BCL2/adenovirus E1B interacting protein 3-like                  |
|  | H3035F04   | 0.0071                        | 2610019F03Rik  | Mm.5727        | RIKEN cDNA 2610019F03 gene                                      |
|  | H598513    | 0.0071                        | Ero1lb         | Mm.358706      | ERO1-like beta                                                  |
|  | H466415    | 0.0072                        | Mid1ip1        | Mm.29429       | Mid1 interacting protein 1                                      |
|  | H338143    | 0.0072                        | Gdpd1          | Mm.281887      | Glycerophosphodiester phosphodiesterase domain containing 1     |

|  | <b>NIA</b> | <b><math>\rho \leq</math></b> | <b>Common</b>  | <b>Unigene</b> | <b>Name</b>                                                                         |
|--|------------|-------------------------------|----------------|----------------|-------------------------------------------------------------------------------------|
|  | H3131G01   | 0.0072                        | 0610007P06Rik  | Mm.28679       | RIKEN cDNA 0610007P06 gene                                                          |
|  | H3096F11   | 0.0072                        | Chst10         | Mm.260054      | Carbohydrate sulfotransferase 10                                                    |
|  | H3003C02   | 0.0072                        | Cldnd1         | Mm.29482       | Claudin domain containing 1                                                         |
|  | H3109D09   | 0.0074                        | Ssx2ip         | Mm.200783      | Synovial sarcoma, X breakpoint 2 interacting protein                                |
|  | H3093A02   | 0.0074                        | Tmem16e        | Mm.254431      | Transmembrane protein 16E                                                           |
|  | H3009B03   | 0.0074                        | Dynll1         | Mm.256858      | Dynein light chain LC8-type 1                                                       |
|  | H3101E01   | 0.0074                        | Ube2q2         | Mm.207894      | Ubiquitin-conjugating enzyme E2Q (putative) 2                                       |
|  | H3159G02   | 0.0074                        | Rac1           | Mm.292510      | RAS-related C3 botulinum substrate 1                                                |
|  | H3015C11   | 0.0075                        | Armc1          | Mm.434309      | Armadillo repeat containing 1                                                       |
|  | H3053D09   | 0.0078                        | Ccdc117        | Mm.210403      | Coiled-coil domain containing 117                                                   |
|  | H3088B08   | 0.0078                        | Fbxo8          | Mm.251174      | F-box protein 8                                                                     |
|  | H3045D07   | 0.0078                        | Naalad2        | Mm.7060        | N-acetylated alpha-linked acidic dipeptidase 2                                      |
|  | H4920352   | 0.0078                        | Parp1          | Mm.277779      | Poly (ADP-ribose) polymerase family, member 1                                       |
|  | H3085A11   | 0.0078                        | Pbef1          | Mm.202727      | Pre-B-cell colony-enhancing factor 1                                                |
|  | H551137    | 0.0078                        | Vrk3           | Mm.28816       | Vaccinia related kinase 3                                                           |
|  | H3131C08   | 0.0079                        | D030074E01Rik  | Mm.273769      | RIKEN cDNA D030074E01 gene                                                          |
|  | H3085D05   | 0.0079                        | Mtap7          | Mm.20928       | Microtubule-associated protein 7                                                    |
|  | H3006A01   | 0.0080                        | Arfgef1        | Mm.229141      | ADP-ribosylation factor guanine nucleotide-exchange factor 1(brefeldin A-inhibited) |
|  | H3051B07   | 0.0080                        | Spin           | Mm.188432      | Spindlin                                                                            |
|  | H3024D07   | 0.0080                        | Stip1          | Mm.258633      | Stress-induced phosphoprotein 1                                                     |
|  | H3146D02   | 0.0080                        | Tmem64         | Mm.394111      | Transmembrane protein 64                                                            |
|  | H3073H11   | 0.0081                        | Fdft1          | Mm.434391      | Farnesyl diphosphate farnesyl transferase 1                                         |
|  | H3134G01   | 0.0081                        | Fundc1         | Mm.41558       | FUN14 domain containing 1                                                           |
|  | H3131E12   | 0.0081                        | Tdrd5          | Mm.252800      | Tudor domain containing 5                                                           |
|  | H3026E12   | 0.0081                        | Uhrf1          | Mm.42196       | Ubiquitin-like, containing PHD and RING finger domains, 1                           |
|  | H3069B07   | 0.0082                        | Aebp2          | Mm.86453       | AE binding protein 2                                                                |
|  | H3074E07   | 0.0082                        | Atpbd1c        | Mm.266328      | ATP binding domain 1 family, member C                                               |
|  | H3158B08   | 0.0083                        | Prkab2         | Mm.31175       | Protein kinase, AMP-activated, beta 2 non-catalytic subunit                         |
|  | H3005D01   | 0.0083                        | Dpp4           | Mm.1151        | Dipeptidylpeptidase 4                                                               |
|  | H3060G09   | 0.0085                        | data not found | Mm.175989      | Membrane-associated ring finger (C3HC4) 5                                           |
|  | H3043F01   | 0.0085                        | Fhod3          | Mm.329322      | Formin homology 2 domain containing 3                                               |
|  | H3013G10   | 0.0085                        | Birc5          | Mm.8552        | Baculoviral IAP repeat-containing 5                                                 |
|  | H3060H03   | 0.0086                        | Tcl1           | Mm.18154       | T-cell lymphoma breakpoint 1                                                        |
|  | H3080B07   | 0.0086                        | Lix1           | Mm.268018      | Limb expression 1 homolog+E276                                                      |
|  | H3081B07   | 0.0087                        | Bzw1           | Mm.21848       | Basic leucine zipper and W2 domains 1                                               |
|  | H3027G07   | 0.0087                        | Cdv3           | Mm.261025      | Carnitine deficiency-associated gene expressed in ventricle 3                       |

|  | <b>NIA</b> | <b><math>\rho \leq</math></b> | <b>Common</b>  | <b>Unigene</b> | <b>Name</b>                                                      |
|--|------------|-------------------------------|----------------|----------------|------------------------------------------------------------------|
|  | H3119A01   | 0.0087                        | Drr1           | Mm.218676      | Developmentally regulated repeat element-containing transcript 1 |
|  | H3149G05   | 0.0087                        | Ccni           | Mm.250419      | Cyclin I                                                         |
|  | H670423    | 0.0088                        | Klhl21         | Mm.22306       | Kelch-like 21                                                    |
|  | H3138D03   | 0.0089                        | Tbc1d8         | Mm.387293      | TBC1 domain family, member 8                                     |
|  | H404508    | 0.0091                        | Zfp57          | Mm.305561      | Zinc finger protein 57                                           |
|  | H3138D04   | 0.0091                        | Cenpq          | Mm.9870        | Centromere protein Q                                             |
|  | H3068B08   | 0.0093                        | Tmem30b        | Mm.251196      | Transmembrane protein 30B                                        |
|  | H3147C08   | 0.0095                        | data not found | Mm.401682      | Transcribed locus                                                |
|  | H3071C06   | 0.0095                        | Gbas           | Mm.12468       | Glioblastoma amplified sequence                                  |
|  | H3042E07   | 0.0097                        | Spata13        | Mm.149776      | Spermatogenesis associated 13                                    |
|  | H3023G07   | 0.0098                        | Ctps           | Mm.1815        | Cytidine 5'-triphosphate synthase                                |
|  | H3126C01   | 0.0099                        | Rab5a          | Mm.300065      | RAB5A, member RAS oncogene family                                |
|  | H3135F02   | 0.0100                        | Exoc4          | Mm.265512      | Exocyst complex component 4                                      |
|  | H3128G04   | 0.0100                        | Ldhb           | Mm.9745        | Lactate dehydrogenase B                                          |
|  | H3053G09   | 0.0100                        | Cep55          | Mm.9916        | Centrosomal protein 55                                           |
|  | H3062G11   | 0.0102                        | Dbf4           | Mm.292470      | DBF4 homolog                                                     |
|  | H3127D01   | 0.0102                        | Snrpb          | Mm.88216       | Small nuclear ribonucleoprotein B                                |
|  | H3015G01   | 0.0102                        | Ube2a          | Mm.395649      | Ubiquitin-conjugating enzyme E2A, RAD6 homolog                   |
|  | H3025H01   | 0.0103                        | H2-Ke2         | Mm.2948        | H2-K region expressed gene 2                                     |
|  | H3109H03   | 0.0104                        | Ell2           | Mm.21288       | Elongation factor RNA polymerase II 2                            |
|  | H3042D05   | 0.0104                        | Skap2          | Mm.221479      | Src family associated phosphoprotein 2                           |
|  | H3120B01   | 0.0105                        | Coro1c         | Mm.260158      | Coronin, actin binding protein 1C                                |
|  | H442438    | 0.0105                        | Gvb1           | Mm.293266      | GA repeat binding protein, beta 1                                |
|  | H4976288   | 0.0105                        | Il1r1          | Mm.896         | Interleukin 1 receptor, type I                                   |
|  | H3159C05   | 0.0107                        | Rab3d          | Mm.260157      | RAB3D, member RAS oncogene family                                |
|  | H3013E01   | 0.0108                        | Clic4          | Mm.257765      | Chloride intracellular channel 4 (mitochondrial)                 |
|  | H3134G04   | 0.0108                        | Ddx4           | Mm.12818       | DEAD (Asp-Glu-Ala-Asp) box polypeptide 4                         |
|  | H3134G02   | 0.0108                        | Rnf12          | Mm.435574      | Ring finger protein 12                                           |
|  | H3109E02   | 0.0110                        | Anks1          | Mm.32556       | Ankyrin repeat and SAM domain containing 1                       |
|  | H3055G02   | 0.0110                        | Ctsc           | Mm.322945      | Cathepsin C                                                      |
|  | H3029G02   | 0.0110                        | Nfxl1          | Mm.187453      | Nuclear transcription factor, X-box binding-like 1               |
|  | H3093F04   | 0.0111                        | Ddx20          | Mm.272826      | DEAD (Asp-Glu-Ala-Asp) box polypeptide 20                        |
|  | H3006C01   | 0.0111                        | Nasp           | Mm.257181      | Nuclear autoantigenic sperm protein (histone-binding)            |
|  | H615180    | 0.0112                        | Gpr108         | Mm.28468       | G protein-coupled receptor 108                                   |
|  | H3149D07   | 0.0112                        | Ncoa5          | Mm.233080      | Nuclear receptor coactivator 5                                   |
|  | H3022E02   | 0.0112                        | Nucks1         | Mm.246869      | Nuclear casein kinase and cyclin-dependent kinase substrate 1    |

|   | <b>NIA</b> | <b><math>\rho \leq</math></b> | <b>Common</b>  | <b>Unigene</b> | <b>Name</b>                                                                                   |
|---|------------|-------------------------------|----------------|----------------|-----------------------------------------------------------------------------------------------|
|   | H3020E01   | 0.0113                        | Hsp110         | Mm.270681      | Heat shock protein 110                                                                        |
|   | H3332261   | 0.0113                        | Jak1           | Mm.289657      | Janus kinase 1                                                                                |
|   | H354417    | 0.0114                        | AL033314       | Mm.391917      | Expressed sequence AL033314                                                                   |
|   | H3031E03   | 0.0114                        | Ddx10          | Mm.133560      | DEAD (Asp-Glu-Ala-Asp) box polypeptide 10                                                     |
|   | H3134D06   | 0.0114                        | Grpel2         | Mm.269657      | GrpE-like 2, mitochondrial                                                                    |
|   | H3043H10   | 0.0114                        | Vprbp          | Mm.422783      | Vpr (HIV-1) binding protein                                                                   |
|   | H475662    | 0.0115                        | Pdcd7          | Mm.29193       | Programmed cell death protein 7                                                               |
|   | H3079D04   | 0.0116                        | Celsr1         | Mm.22680       | Cadherin EGF LAG seven-pass G-type receptor 1                                                 |
|   | H3022G05   | 0.0116                        | Chmp5          | Mm.212763      | Chromatin modifying protein 5                                                                 |
|   | H3043B01   | 0.0117                        | Atad2b         | Mm.210966      | ATPase family, AAA domain containing 2B                                                       |
|   | H3043A09   | 0.0119                        | Kpna2          | Mm.12508       | Karyopherin (importin) alpha 2                                                                |
|   | H3128G06   | 0.0120                        | Alkbh5         | Mm.262056      | AlkB, alkylation repair homolog 5                                                             |
|   | H539100    | 0.0121                        | Ipo8           | Mm.260105      | Importin 8                                                                                    |
|   | H597483    | 0.0122                        | data not found | Mm.270259      | Septin 7                                                                                      |
|   | H3070H08   | 0.0122                        | data not found | Mm.351228      | Transcribed locus                                                                             |
|   | H3151D07   | 0.0125                        | Abhd10         | Mm.247453      | Abhydrolase domain containing 10                                                              |
|   | H3059A05   | 0.0125                        | Mad2l1         | Mm.290830      | MAD2 (mitotic arrest deficient, homolog)-like 1                                               |
|   | H3029F02   | 0.0125                        | Nsf            | Mm.260117      | N-ethylmaleimide sensitive fusion protein                                                     |
|   | H329436    | 0.0125                        | Thbd           | Mm.24096       | Thrombomodulin                                                                                |
|   | H3101C03   | 0.0125                        | Ube2g1         | Mm.340315      | Ubiquitin-conjugating enzyme E2G 1                                                            |
|   | H3146D11   | 0.0126                        | Cd8b1          | Mm.153963      | CD8 antigen, beta chain 1                                                                     |
|   | H3021F09   | 0.0126                        | Smc2           | Mm.2999        | Structural maintenance of chromosomes 2                                                       |
|   | H3052G01   | 0.0128                        | Mdm4           | Mm.426531      | Transformed mouse 3T3 cell double minute 4                                                    |
|   | H3106D07   | 0.0129                        | Cdc42          | Mm.1022        | Cell division cycle 42 homolog                                                                |
|   | H3034B07   | 0.0130                        | Adamts1        | Mm.1421        | A disintegrin-like and metallopeptidase (reprolysin type) with thrombospondin type 1 motif, 1 |
|   | H3111B10   | 0.0130                        | Ap3b2          | Mm.322894      | Adaptor-related protein complex 3, beta 2 subunit                                             |
|   | H3144F10   | 0.0134                        | 8030402F09Rik  | Mm.258969      | RIKEN cDNA 8030402F09 gene                                                                    |
| ‡ | H582767    | 0.0134                        | Vbp1           | Mm.8294        | Von Hippel-Lindau binding protein 1                                                           |
|   | H3011H07   | 0.0135                        | Arcn1          | Mm.371682      | Archain 1                                                                                     |
|   | H3142C11   | 0.0135                        | Bpgm           | Mm.282863      | 2,3-bisphosphoglycerate mutase                                                                |
|   | H3107H01   | 0.0135                        | Jam3           | Mm.28770       | Junction adhesion molecule 3                                                                  |
|   | H3085G07   | 0.0135                        | Tgoln1         | Mm.246563      | Trans-golgi network protein                                                                   |
|   | H3081D01   | 0.0136                        | data not found | Mm.26250       | Transcribed locus                                                                             |
|   | H641403    | 0.0136                        | Elp4           | Mm.33870       | Elongation protein 4 homolog                                                                  |
|   | H421434    | 0.0136                        | Whsc2          | Mm.332320      | Wolf-Hirschhorn syndrome candidate 2                                                          |
|   | H3038C09   | 0.0138                        | Prpsap2        | Mm.27703       | Phosphoribosyl pyrophosphate synthetase-associated protein 2                                  |

|   | <b>NIA</b> | <b><math>\rho \leq</math></b> | <b>Common</b> | <b>Unigene</b> | <b>Name</b>                                                                              |
|---|------------|-------------------------------|---------------|----------------|------------------------------------------------------------------------------------------|
|   | H3023E01   | 0.0138                        | Skp1a         | Mm.42944       | S-phase kinase-associated protein 1A                                                     |
|   | H386370    | 0.0139                        | Hnrpa1        | Mm.237064      | Heterogeneous nuclear ribonucleoprotein A1                                               |
|   | H3152C01   | 0.0139                        | Rqcd1         | Mm.291708      | Rcd1 (required for cell differentiation) homolog 1                                       |
| ‡ | H519629    | 0.0140                        | Rbpms2        | Mm.29148       | RNA binding protein with multiple splicing 2                                             |
|   | H3056A07   | 0.0141                        | Nubp1         | Mm.29037       | Nucleotide binding protein 1                                                             |
|   | H3151C11   | 0.0141                        | Sec22a        | Mm.259164      | SEC22 vesicle trafficking protein-like A+E446                                            |
|   | H3137D07   | 0.0142                        | Abce1         | Mm.5831        | ATP-binding cassette, sub-family E (OABP), member 1                                      |
|   | H3081G04   | 0.0142                        | Rfk           | Mm.7013        | Riboflavin kinase                                                                        |
|   | H3135F10   | 0.0142                        | Trim71        | Mm.17857       | Tripartite motif-containing 71                                                           |
|   | H3149C09   | 0.0143                        | Gprasp1       | Mm.271980      | G protein-coupled receptor associated sorting protein 1                                  |
|   | H3070F06   | 0.0143                        | lpmk          | Mm.245867      | Inositol polyphosphate multikinase                                                       |
|   | H3037G09   | 0.0144                        | Dnajc11       | Mm.21353       | DnaJ (Hsp40) homolog, subfamily C, member 11                                             |
|   | H3108C01   | 0.0145                        | 4930444A02Rik | Mm.17631       | RIKEN cDNA 4930444A02 gene                                                               |
|   | H3142H09   | 0.0145                        | Epb4.1l2      | Mm.306026      | Erythrocyte protein band 4.1-like 2                                                      |
|   | H3102B01   | 0.0145                        | Ube3a         | Mm.9002        | Ubiquitin protein ligase E3A                                                             |
|   | H3059D06   | 0.0145                        | Zcchc8        | Mm.279427      | Zinc finger, CCHC domain containing 8                                                    |
|   | H3131A02   | 0.0146                        | Sfpq          | Mm.257276      | Splicing factor proline/glutamine rich (polypyrimidine tract binding protein associated) |
|   | H3140D08   | 0.0147                        | Fkbp1a        | Mm.278458      | FK506 binding protein 1a                                                                 |
|   | H3071A02   | 0.0147                        | Srpk1         | Mm.15252       | Serine/arginine-rich protein specific kinase 1                                           |
|   | H3063D04   | 0.0148                        | 2010107G23Rik | Mm.294126      | RIKEN cDNA 2010107G23 gene                                                               |
|   | H3153D08   | 0.0149                        | Zfhx1a        | Mm.3929        | Zinc finger homeobox 1a                                                                  |
|   | H3007E09   | 0.0150                        | 2610101N10Rik | Mm.292742      | RIKEN cDNA 2610101N10 gene                                                               |
|   | H3133G01   | 0.0150                        | Oxr1          | Mm.254267      | Oxidation resistance 1                                                                   |
|   | H3038E03   | 0.0150                        | Pawr          | Mm.391419      | PRKC, apoptosis, WT1, regulator                                                          |
|   | H3070B02   | 0.0150                        | Vdp           | Mm.15868       | Vesicle docking protein                                                                  |
|   | H3151H01   | 0.0150                        | Vps41         | Mm.27389       | Vacuolar protein sorting 41+E589                                                         |
|   | H617672    | 0.0151                        | 1110005A23Rik | Mm.351579      | RIKEN cDNA 1110005A23 gene                                                               |
|   | H3061G08   | 0.0151                        | AU041783      | Mm.226284      | Expressed sequence AU041783                                                              |
|   | H3071B07   | 0.0151                        | Mtus1         | Mm.149438      | Mitochondrial tumor suppressor 1                                                         |
|   | H3051A08   | 0.0152                        | Nploc4        | Mm.309520      | Nuclear protein localization 4 homolog+E380                                              |
|   | H617676    | 0.0152                        | Tlr1          | Mm.273024      | Toll-like receptor 1                                                                     |
|   | H3096D07   | 0.0154                        | Nr2f1         | Mm.14297       | Nuclear receptor subfamily 2, group F, member 1                                          |
|   | H3024D01   | 0.0154                        | Tubb2c        | Mm.227260      | Tubulin, beta 2c                                                                         |
|   | H3094E02   | 0.0155                        | Ptch1         | Mm.228798      | Patched homolog 1                                                                        |
|   | H3095B01   | 0.0158                        | D430039N05Rik | Mm.330351      | RIKEN cDNA D430039N05 gene                                                               |
|   | H634745    | 0.0158                        | Rbm12         | Mm.27660       | RNA binding motif protein 12                                                             |

|  | <b>NIA</b> | <b><math>\rho \leq</math></b> | <b>Common</b>  | <b>Unigene</b> | <b>Name</b>                                                                                     |
|--|------------|-------------------------------|----------------|----------------|-------------------------------------------------------------------------------------------------|
|  | H3098E02   | 0.0158                        | Vps54          | Mm.170103      | Vacuolar protein sorting 54 (yeast)                                                             |
|  | H3031H01   | 0.0160                        | Agpat5         | Mm.24117       | 1-acylglycerol-3-phosphate O-acyltransferase 5 (lysophosphatidic acid acyltransferase, epsilon) |
|  | H3058H08   | 0.0160                        | Pros1          | Mm.127156      | Protein S (alpha)                                                                               |
|  | H3113E08   | 0.0161                        | Cops6          | Mm.3981        | COP9 (constitutive photomorphogenic) homolog, subunit 6                                         |
|  | H3151G08   | 0.0161                        | Ppig           | Mm.11815       | Peptidyl-prolyl isomerase G (cyclophilin G)                                                     |
|  | H3113E07   | 0.0161                        | Rras2          | Mm.276572      | Related RAS viral (r-ras) oncogene homolog 2                                                    |
|  | H3026B01   | 0.0161                        | Tbp            | Mm.244820      | TATA box binding protein                                                                        |
|  | H3069G10   | 0.0163                        | Dpf3           | Mm.151308      | D4, zinc and double PHD fingers, family 3                                                       |
|  | H3073E01   | 0.0164                        | AU024076       | Mm.326336      | Expressed sequence AU024076                                                                     |
|  | H3097F11   | 0.0164                        | Mbl2           | Mm.30045       | Mannose binding lectin (C)                                                                      |
|  | H3159B07   | 0.0165                        | 2900057K09Rik  | Mm.323087      | RIKEN cDNA 2900057K09 gene                                                                      |
|  | H400490    | 0.0166                        | Ube2n          | Mm.434498      | Ubiquitin-conjugating enzyme E2N                                                                |
|  | H3087H01   | 0.0167                        | data not found | Mm.380982      | Transcribed locus                                                                               |
|  | H3085B01   | 0.0168                        | Csnk1a1        | Mm.26908       | Casein kinase 1, alpha 1                                                                        |
|  | H618102    | 0.0168                        | Gimap4         | Mm.333048      | GTPase, IMAP family member 4                                                                    |
|  | H3029C08   | 0.0168                        | Paxip1         | Mm.277190      | PAX interacting (with transcription-activation domain) protein 1                                |
|  | H621092    | 0.0169                        | D11Wsu47e      | Mm.239566      | DNA segment, Chr 11, Wayne State University 47, expressed                                       |
|  | H3013D03   | 0.0169                        | Rab10          | Mm.378993      | RAB10, member RAS oncogene family                                                               |
|  | H3058D08   | 0.0170                        | Myh10          | Mm.218233      | Myosin, heavy polypeptide 10, non-muscle                                                        |
|  | H3088C02   | 0.0171                        | Cd55           | Mm.101591      | CD55 antigen                                                                                    |
|  | H3063D10   | 0.0172                        | Gbe1           | Mm.396102      | Glucan (1,4-alpha-), branching enzyme 1                                                         |
|  | H3016D02   | 0.0172                        | Stt3a          | Mm.2863        | STT3, subunit of the oligosaccharyltransferase complex, homolog A                               |
|  | H3052E08   | 0.0173                        | 9130213B05Rik  | Mm.5002        | RIKEN cDNA 9130213B05 gene                                                                      |
|  | H634823    | 0.0173                        | Cetn2          | Mm.24643       | Centrin 2                                                                                       |
|  | H3059E07   | 0.0173                        | Il17f          | Mm.222807      | Interleukin 17F                                                                                 |
|  | H3155H02   | 0.0173                        | Prc1           | Mm.227274      | Protein regulator of cytokinesis 1                                                              |
|  | H3066G05   | 0.0173                        | Wdr42a         | Mm.159915      | WD repeat domain 42A                                                                            |
|  | H3054D06   | 0.0176                        | Ovgp1          | Mm.431947      | Oviductal glycoprotein 1                                                                        |
|  | H3066E03   | 0.0177                        | BC025546       | Mm.275341      | CDNA sequence BC025546                                                                          |
|  | H3018F02   | 0.0177                        | Kifap3         | Mm.4651        | Kinesin-associated protein 3                                                                    |
|  | H3035F07   | 0.0177                        | LOC665306      | Mm.358758      | Hypothetical protein LOC665306                                                                  |
|  | H3104A09   | 0.0177                        | Lpgat1         | Mm.277958      | Lysophosphatidylglycerol acyltransferase 1                                                      |
|  | H3030A08   | 0.0177                        | Rpa1           | Mm.180734      | Replication protein A1                                                                          |
|  | H553017    | 0.0177                        | Zbtb3          | Mm.23423       | Zinc finger and BTB domain containing 3                                                         |
|  | H3104A03   | 0.0179                        | Esp1           | Mm.288324      | Extra spindle poles-like 1                                                                      |
|  | H3057E10   | 0.0180                        | D10Wsu102e     | Mm.196210      | DNA segment, Chr 10, Wayne State University 102, expressed                                      |

|  | <b>NIA</b> | <b><math>\rho \leq</math></b> | <b>Common</b> | <b>Unigene</b> | <b>Name</b>                                                              |
|--|------------|-------------------------------|---------------|----------------|--------------------------------------------------------------------------|
|  | H3155F07   | 0.0182                        | 2810008M24Rik | Mm.29464       | RIKEN cDNA 2810008M24 gene                                               |
|  | H582040    | 0.0182                        | Hook3         | Mm.334464      | Hook homolog 3                                                           |
|  | H3134C03   | 0.0183                        | Cnot2         | Mm.351553      | CCR4-NOT transcription complex, subunit 2                                |
|  | H598316    | 0.0183                        | Rab1          | Mm.271944      | RAB1, member RAS oncogene family                                         |
|  | H3030G01   | 0.0184                        | Rpe           | Mm.240912      | Ribulose-5-phosphate-3-epimerase                                         |
|  | H3084C01   | 0.0184                        | Siah1a        | Mm.324553      | Seven in absentia 1A                                                     |
|  | H557977    | 0.0185                        | Gimap3        | Mm.333050      | GTPase, IMAP family member 3                                             |
|  | H3120E08   | 0.0185                        | Pkp4          | Mm.260938      | Plakophilin 4                                                            |
|  | H3090B04   | 0.0185                        | Usp1          | Mm.371692      | Ubiquitin specific peptidase 1                                           |
|  | H3063A07   | 0.0189                        | Atp9b         | Mm.247138      | ATPas, class II, type 9B                                                 |
|  | H538160    | 0.0189                        | Chd7          | Mm.138792      | Chromodomain helicase DNA binding protein 7                              |
|  | H3048H01   | 0.0189                        | Hnrpc         | Mm.427321      | Heterogeneous nuclear ribonucleoprotein C                                |
|  | H3070F03   | 0.0189                        | Nlrp4b        | Mm.95244       | NLR family, pyrin domain containing 4B                                   |
|  | H3078F08   | 0.0189                        | Spata2        | Mm.34342       | Spermatogenesis associated 2                                             |
|  | H3135D07   | 0.0191                        | Dhcr24        | Mm.133370      | 24-dehydrocholesterol reductase                                          |
|  | H617913    | 0.0191                        | Nuak1         | Mm.25874       | NUAK family, SNF1-like kinase, 1                                         |
|  | H575740    | 0.0192                        | Ear2          | Mm.327386      | Eosinophil-associated, ribonuclease A family, member 2                   |
|  | H3096C07   | 0.0192                        | Rbbp5         | Mm.132868      | Retinoblastoma binding protein 5                                         |
|  | H336029    | 0.0193                        | D10Bwg1379e   | Mm.40491       | DNA segment, Chr 10, Brigham & Women's Genetics 1379 expressed           |
|  | H657430    | 0.0193                        | Ranbp10       | Mm.4206        | RAN binding protein 10                                                   |
|  | H637279    | 0.0194                        | Dscr1l2       | Mm.331970      | Down syndrome critical region gene 1-like 2                              |
|  | H3094H01   | 0.0197                        | Otud1         | Mm.83981       | OTU domain containing 1                                                  |
|  | H3018H09   | 0.0198                        | Csnk2a1       | Mm.298893      | Casein kinase 2, alpha 1 polypeptide                                     |
|  | H3103H02   | 0.0200                        | D11Ert636e    | Mm.229207      | DNA segment, Chr 11, ERATO Doi 636, expressed                            |
|  | H3013B01   | 0.0200                        | Taf3          | Mm.86343       | TAF3 RNA polymerase II, TATA box binding protein (TBP)-associated factor |
|  | H3045D09   | 0.0201                        | Vps24         | Mm.181278      | Vacuolar protein sorting 24                                              |
|  | H3086F02   | 0.0204                        | Rtn4ip1       | Mm.390253      | Reticulon 4 interacting protein 1                                        |
|  | H3146G10   | 0.0204                        | Zzz3          | Mm.425142      | Zinc finger, ZZ domain containing 3                                      |
|  | H3027H08   | 0.0206                        | 2900073G15Rik | Mm.261329      | RIKEN cDNA 2900073G15 gene                                               |
|  | H3101A05   | 0.0206                        | Tmem16a       | Mm.26700       | Transmembrane protein 16A                                                |
|  | H637211    | 0.0207                        | Gda           | Mm.45054       | Guanine deaminase                                                        |
|  | H3123E04   | 0.0207                        | Pols          | Mm.315959      | Polymerase (DNA directed) sigma                                          |
|  | H3126H06   | 0.0207                        | Zfp87         | Mm.315879      | Zinc finger protein 87                                                   |
|  | H3025E01   | 0.0209                        | C330019G07Rik | Mm.335866      | RIKEN cDNA C330019G07 gene                                               |
|  | H3042H08   | 0.0209                        | Spred2        | Mm.266627      | Sprouty-related, EVH1 domain containing 2                                |
|  | H3090A04   | 0.0209                        | Strn          | Mm.311915      | Striatin, calmodulin binding protein                                     |

|   | <b>NIA</b> | <b><math>\rho \leq</math></b> | <b>Common</b>  | <b>Unigene</b> | <b>Name</b>                                                                    |
|---|------------|-------------------------------|----------------|----------------|--------------------------------------------------------------------------------|
|   | H3058D07   | 0.0211                        | Mmp23          | Mm.29373       | Matrix metalloproteinase 23                                                    |
|   | H3030D01   | 0.0212                        | Abcb7          | Mm.426128      | ATP-binding cassette, sub-family B (MDR/TAP), member 7                         |
|   | H3006F07   | 0.0212                        | Nmd3           | Mm.21062       | NMD3 homolog                                                                   |
|   | H3014E07   | 0.0212                        | Sec11c         | Mm.27800       | SEC11 homolog C                                                                |
|   | H3039E11   | 0.0213                        | Foxn2          | Mm.393597      | Forkhead box N2                                                                |
|   | H3023C12   | 0.0213                        | Pcqap          | Mm.208970      | Positive cofactor 2, multiprotein complex, glutamine/Q-rich-associated protein |
|   | H636120    | 0.0215                        | Dolpp1         | Mm.285167      | Dolichyl pyrophosphate phosphatase 1                                           |
| ‡ | H3089E09   | 0.0215                        | Ivns1abp       | Mm.33764       | Influenza virus NS1A binding protein                                           |
|   | H3020G01   | 0.0215                        | Pak1ip1        | Mm.24789       | PAK1 interacting protein 1                                                     |
|   | H3043B08   | 0.0216                        | Trappc6b       | Mm.290070      | Trafficking protein particle complex 6B                                        |
|   | H3154F01   | 0.0217                        | data not found | Mm.427081      | Transcribed locus, weakly similar to NP_001017510.1 protein LOC498750          |
|   | H3493036   | 0.0217                        | Nap111         | Mm.432116      | Nucleosome assembly protein 1-like 1                                           |
|   | H3030C07   | 0.0218                        | Large          | Mm.324371      | Like-glycosyltransferase                                                       |
|   | H3051H06   | 0.0221                        | AU017455       | Mm.435553      | Expressed sequence AU017455                                                    |
|   | H3016E01   | 0.0221                        | Prps1          | Mm.268180      | Phosphoribosyl pyrophosphate synthetase 1                                      |
|   | H3006E05   | 0.0224                        | Seh1l          | Mm.307315      | SEH1-like (S. cerevisiae)                                                      |
|   | H420319    | 0.0225                        | Psat1          | Mm.289936      | Phosphoserine aminotransferase 1                                               |
|   | H3066A03   | 0.0227                        | Usp42          | Mm.259620      | Ubiquitin specific peptidase 42                                                |
|   | H3124A04   | 0.0229                        | Msh6           | Mm.18210       | MutS homolog 6 (E. coli)                                                       |
|   | H582683    | 0.0230                        | Herpud2        | Mm.142843      | HERPUD family member 2                                                         |
|   | H330603    | 0.0232                        | 2700081L22Rik  | Mm.391869      | RIKEN cDNA 2700081L22 gene                                                     |
|   | H3017C02   | 0.0232                        | 4930548G07Rik  | Mm.152466      | RIKEN cDNA 4930548G07 gene                                                     |
|   | H3074G07   | 0.0232                        | C330018D20Rik  | Mm.256874      | RIKEN cDNA C330018D20 gene                                                     |
|   | H3081F02   | 0.0232                        | Eif4enif1      | Mm.255649      | Eukaryotic translation initiation factor 4E nuclear import factor 1            |
|   | H3024C08   | 0.0232                        | Hax1           | Mm.256035      | HCLS1 associated X-1                                                           |
|   | H3101D04   | 0.0232                        | Hrb            | Mm.380683      | HIV-1 Rev binding protein                                                      |
|   | H3072C08   | 0.0232                        | Lrrfip1        | Mm.45039       | Leucine rich repeat (in FLII) interacting protein 1                            |
|   | H613955    | 0.0232                        | Mcoln1         | Mm.8356        | Mucolipin 1                                                                    |
|   | H3101A02   | 0.0232                        | R3hdm2         | Mm.29342       | R3H domain containing 2                                                        |
|   | H3070F02   | 0.0234                        | B3gnt2         | Mm.258094      | UDP-GlcNAc:betaGal beta-1,3-N-acetylglucosaminyltransferase 2                  |
|   | H3115C07   | 0.0237                        | Opa1           | Mm.274285      | Optic atrophy 1 homolog                                                        |
|   | H3074H01   | 0.0238                        | Syde2          | Mm.268854      | Synapse defective 1, Rho GTPase, homolog 2                                     |
|   | H3065D04   | 0.0242                        | Nlrp14         | Mm.35644       | NLR family, pyrin domain containing 14                                         |
|   | H3076A08   | 0.0243                        | Polr2h         | Mm.288730      | Polymerase (RNA) II (DNA directed) polypeptide H                               |
|   | H3030B03   | 0.0243                        | Zfp655         | Mm.206555      | Zinc finger protein 655                                                        |
|   | H3050E02   | 0.0245                        | Ccpg1          | Mm.268475      | Cell cycle progression 1                                                       |

|  | <b>NIA</b> | <b><math>\rho \leq</math></b> | <b>Common</b> | <b>Unigene</b> | <b>Name</b>                                                                |
|--|------------|-------------------------------|---------------|----------------|----------------------------------------------------------------------------|
|  | H3156C05   | 0.0245                        | Dusp7         | Mm.275584      | Dual specificity phosphatase 7                                             |
|  | H3078A07   | 0.0245                        | E030046B03Rik | Mm.11567       | RIKEN cDNA E030046B03 gene                                                 |
|  | H3149C01   | 0.0245                        | Mphosph10     | Mm.26973       | M-phase phosphoprotein 10 (U3 small nucleolar ribonucleoprotein)           |
|  | H3004F07   | 0.0245                        | Ptp4a2        | Mm.193688      | Protein tyrosine phosphatase 4a2                                           |
|  | H3101E10   | 0.0248                        | Lypla1        | Mm.299955      | Lysophospholipase 1                                                        |
|  | H3080D03   | 0.0248                        | Tubb2b        | Mm.379227      | Tubulin, beta 2b                                                           |
|  | H3067A07   | 0.0249                        | Kcmf1         | Mm.29194       | Potassium channel modulatory factor 1                                      |
|  | H3148D11   | 0.0249                        | Psma5         | Mm.208883      | Proteasome (prosome, macropain) subunit, alpha type 5                      |
|  | H3056A02   | 0.0251                        | Klf6          | Mm.275036      | Kruppel-like factor 6                                                      |
|  | H3112G08   | 0.0252                        | Lats2         | Mm.347899      | Large tumor suppressor 2                                                   |
|  | H3106A07   | 0.0252                        | Nolc1         | Mm.402190      | Nucleolar and coiled-body phosphoprotein 1                                 |
|  | H3150E07   | 0.0254                        | 5730593F17Rik | Mm.262113      | RIKEN cDNA 5730593F17 gene                                                 |
|  | H3127F07   | 0.0254                        | Cdc73         | Mm.389191      | Vcell division cycle 73, Paf1/RNA polymerase II complex component, homolog |
|  | H3005H07   | 0.0256                        | Smap1l        | Mm.271819      | Stromal membrane-associated protein 1-like                                 |
|  | H3034D08   | 0.0256                        | Zc3h11a       | Mm.245357      | Zinc finger CCCH type containing 11A                                       |
|  | H3087G08   | 0.0256                        | Zfp654        | Mm.25960       | Zinc finger protein 654                                                    |
|  | H3052B05   | 0.0257                        | Cul5          | Mm.434362      | Cullin 5                                                                   |
|  | H402552    | 0.0257                        | Kcnk1         | Mm.10800       | Potassium channel, subfamily K, member 1                                   |
|  | H3101C04   | 0.0257                        | Tbl1xr1       | Mm.202966      | Transducin (beta)-like 1X-linked receptor 1                                |
|  | H3016H02   | 0.0258                        | Pold3         | Mm.37562       | Polymerase (DNA-directed), delta 3, accessory subunit                      |
|  | H3030F07   | 0.0259                        | Copb2         | Mm.400464      | Coatomer protein complex, subunit beta 2 (beta prime)                      |
|  | H3111F10   | 0.0259                        | Trim37        | Mm.17436       | Tripartite motif protein 37                                                |
|  | H644818    | 0.0261                        | Ccdc126       | Mm.32416       | Coiled-coil domain containing 126                                          |
|  | H3008B05   | 0.0261                        | Dag1          | Mm.7524        | Dystroglycan 1                                                             |
|  | H597078    | 0.0261                        | Ikbkb         | Mm.277886      | Inhibitor of kappaB kinase beta                                            |
|  | H3032E09   | 0.0261                        | Synj2bp       | Mm.279603      | Synaptojanin 2 binding protein                                             |
|  | H3075E09   | 0.0261                        | Zfp535        | Mm.340052      | Zinc finger protein 535                                                    |
|  | H3123D08   | 0.0262                        | Vps29         | Mm.216528      | Vacuolar protein sorting 29                                                |
|  | H3102E02   | 0.0263                        | Ppp2r5c       | Mm.240396      | Protein phosphatase 2, regulatory subunit B (B56), gamma isoform           |
|  | H3097F07   | 0.0264                        | AU040829      | Mm.134338      | Expressed sequence AU040829                                                |
|  | H3029F07   | 0.0265                        | Leo1          | Mm.41508       | Leo1, Paf1/RNA polymerase II complex component, homolog                    |
|  | H3027F07   | 0.0266                        | Map2k6        | Mm.14487       | Mitogen activated protein kinase kinase 6                                  |
|  | H3059H12   | 0.0267                        | Plac1l        | Mm.26881       | Placenta-specific 1-like                                                   |
|  | H3068A06   | 0.0268                        | Aytl2         | Mm.284649      | Acyltransferase like 2                                                     |
|  | H3085E08   | 0.0268                        | LOC635617     | Mm.435560      | Hypothetical LOC635617                                                     |
|  | H3073E02   | 0.0268                        | Pttg1         | Mm.6856        | Pituitary tumor-transforming 1                                             |

|  | <b>NIA</b> | <b><math>\rho \leq</math></b> | <b>Common</b>  | <b>Unigene</b> | <b>Name</b>                                                |
|--|------------|-------------------------------|----------------|----------------|------------------------------------------------------------|
|  | H3016D07   | 0.0272                        | Atp8b1         | Mm.270043      | ATPase, class I, type 8B, member 1                         |
|  | H3026G07   | 0.0273                        | Bbx            | Mm.28940       | Bobby sox homolog                                          |
|  | H3015D01   | 0.0278                        | Tubb5          | Mm.434402      | Tubulin, beta 5                                            |
|  | H3708478   | 0.0279                        | Hnrpf          | Mm.422979      | Heterogeneous nuclear ribonucleoprotein F                  |
|  | H3021H03   | 0.0279                        | Rsu1           | Mm.905         | Ras suppressor protein 1                                   |
|  | H3108C09   | 0.0279                        | Wfdc2          | Mm.27289       | WAP four-disulfide core domain 2                           |
|  | H3158C11   | 0.0283                        | Gja4           | Mm.24615       | Gap junction membrane channel protein alpha 4              |
|  | H3131A10   | 0.0286                        | Sypl           | Mm.246304      | Synaptophysin-like protein                                 |
|  | H3013H07   | 0.0289                        | Hbld2          | Mm.7884        | HESB like domain containing 2                              |
|  | H3010F07   | 0.0291                        | Pdcd6ip        | Mm.29816       | Programmed cell death 6 interacting protein                |
|  | H3158G03   | 0.0292                        | Kif9           | Mm.42170       | Kinesin family member 9                                    |
|  | H3103A05   | 0.0292                        | Pla2g4a        | Mm.4186        | Phospholipase A2, group IVA (cytosolic, calcium-dependent) |
|  | H3080D09   | 0.0293                        | B230220E17Rik  | Mm.241965      | RIKEN cDNA B230220E17 gene                                 |
|  | H3036H07   | 0.0295                        | 9430057O19Rik  | Mm.21450       | RIKEN cDNA 9430057O19 gene                                 |
|  | H3091F11   | 0.0295                        | Shoc2          | Mm.228669      | Soc-2 (suppressor of clear) homolog                        |
|  | H3130G03   | 0.0296                        | BC017133       | Mm.404420      | CDNA sequence BC017133                                     |
|  | H3110C08   | 0.0297                        | Rnasen         | Mm.293142      | Ribonuclease III, nuclear                                  |
|  | H3151D08   | 0.0298                        | Dad1           | Mm.319038      | Defender against cell death 1                              |
|  | H3063A08   | 0.0299                        | Lgmn           | Mm.17185       | Legumain                                                   |
|  | H3075B01   | 0.0302                        | Baz2a          | Mm.252213      | Bromodomain adjacent to zinc finger domain, 2A             |
|  | H3012C02   | 0.0302                        | Canx           | Mm.248827      | Calnexin                                                   |
|  | H3095A05   | 0.0302                        | Esr1           | Mm.9213        | Estrogen receptor 1 (alpha)                                |
|  | H3070C01   | 0.0303                        | 5730557L09Rik  | Mm.392007      | RIKEN cDNA 5730557L09 gene                                 |
|  | H3042B07   | 0.0303                        | Ccdc43         | Mm.277638      | Coiled-coil domain containing 43                           |
|  | H3089F02   | 0.0303                        | Edem1          | Mm.21596       | ER degradation enhancer, mannosidase alpha-like 1          |
|  | H3102F02   | 0.0305                        | Ehd4           | Mm.132226      | EH-domain containing 4                                     |
|  | H3085A07   | 0.0307                        | data not found | Mm.410573      | Transcribed locus                                          |
|  | H3091D08   | 0.0307                        | Gna14          | Mm.313181      | Guanine nucleotide binding protein, alpha 14               |
|  | H1477166   | 0.0307                        | Hnrpa2b1       | Mm.155896      | Heterogeneous nuclear ribonucleoprotein A2/B1              |
|  | H3008A08   | 0.0307                        | Melk           | Mm.268668      | Maternal embryonic leucine zipper kinase                   |
|  | H3037C07   | 0.0307                        | Trim13         | Mm.23959       | Tripartite motif protein 13                                |
|  | H3028H06   | 0.0308                        | Pdk1           | Mm.34411       | Pyruvate dehydrogenase kinase, isoenzyme 1                 |
|  | H3132G09   | 0.0309                        | Atp6v1h        | Mm.27082       | ATPase, H+ transporting, lysosomal V1 subunit H            |
|  | H313744    | 0.0309                        | D14Ert436e     | Mm.287279      | DNA segment, Chr 14, ERATO Doi 436, expressed              |
|  | H3038A11   | 0.0309                        | data not found | Mm.350239      | Transcribed locus                                          |
|  | H3051C10   | 0.0309                        | Nrp1           | Mm.271745      | Neuropilin 1                                               |

|  | <b>NIA</b> | <b><math>\rho \leq</math></b> | <b>Common</b> | <b>Unigene</b> | <b>Name</b>                                                                   |
|--|------------|-------------------------------|---------------|----------------|-------------------------------------------------------------------------------|
|  | H3022B07   | 0.0309                        | Pigs          | Mm.295908      | Phosphatidylinositol glycan anchor biosynthesis, class S                      |
|  | H3034B01   | 0.0309                        | Ube2l3        | Mm.3074        | Ubiquitin-conjugating enzyme E2L 3                                            |
|  | H537177    | 0.0310                        | Chordc1       | Mm.103534      | Cysteine and histidine-rich domain (CHORD)-containing, zinc-binding protein 1 |
|  | H3149G02   | 0.0312                        | Smad3         | Mm.7320        | MAD homolog 3+E679                                                            |
|  | H3101A12   | 0.0313                        | Ccrn4l        | Mm.86541       | CCR4 carbon catabolite repression 4-like                                      |
|  | H3076H09   | 0.0313                        | Unc13c        | Mm.41035       | Unc-13 homolog C                                                              |
|  | H3013E02   | 0.0314                        | Bxdc2         | Mm.28057       | Brix domain containing 2                                                      |
|  | H634707    | 0.0318                        | Ccnb1         | Mm.260114      | Cyclin B1                                                                     |
|  | H577160    | 0.0318                        | Crsp6         | Mm.44151       | Cofactor required for Sp1 transcriptional activation, subunit 6               |
|  | H3038B10   | 0.0318                        | Csnk2a2       | Mm.51136       | Casein kinase 2, alpha prime polypeptide                                      |
|  | H3089C02   | 0.0318                        | D2ErtD391e    | Mm.28492       | DNA segment, Chr 2, ERATO Doi 391, expressed                                  |
|  | H599008    | 0.0319                        | Cxcl12        | Mm.303231      | Chemokine (C-X-C motif) ligand 12                                             |
|  | H3057G07   | 0.0319                        | Dock7         | Mm.260623      | Dedicator of cytokinesis 7                                                    |
|  | H3129E02   | 0.0319                        | Gtpbp8        | Mm.34520       | GTP-binding protein 8 (putative)                                              |
|  | H3122A02   | 0.0319                        | Hoxb3         | Mm.342481      | Homeo box B3                                                                  |
|  | H639132    | 0.0319                        | Slc14a1       | Mm.33832       | Solute carrier family 14 (urea transporter), member 1                         |
|  | H3075E01   | 0.0321                        | Snx6          | Mm.28240       | Sorting nexin 6                                                               |
|  | H582141    | 0.0324                        | Cfl2          | Mm.276826      | Cofilin 2, muscle                                                             |
|  | H3060D01   | 0.0324                        | Cnot7         | Mm.272551      | CCR4-NOT transcription complex, subunit 7                                     |
|  | H3101E07   | 0.0324                        | Tjp2          | Mm.104744      | Tight junction protein 2                                                      |
|  | H719317    | 0.0326                        | Lsm11         | Mm.249827      | U7 snRNP-specific Sm-like protein LSM11                                       |
|  | H3011F08   | 0.0329                        | Errfi1        | Mm.318841      | ERBB receptor feedback inhibitor 1                                            |
|  | H3087B01   | 0.0335                        | AU022751      | Mm.199793      | Expressed sequence AU022751                                                   |
|  | H3113F04   | 0.0335                        | Nkiras1       | Mm.25648       | NFKB inhibitor interacting Ras-like protein 1                                 |
|  | H3113A01   | 0.0335                        | Slbp          | Mm.4172        | Stem-loop binding protein                                                     |
|  | H524113    | 0.0335                        | Yip6          | Mm.212290      | Yip1 domain family, member 6                                                  |
|  | H3049D01   | 0.0338                        | Senp6         | Mm.28232       | SUMO/sentrin specific peptidase 6                                             |
|  | H3078G10   | 0.0341                        | Drd3          | Mm.327835      | Dopamine receptor 3                                                           |
|  | H723423    | 0.0342                        | Cugbp2        | Mm.431429      | CUG triplet repeat, RNA binding protein 2                                     |
|  | H3101G07   | 0.0345                        | 5730420B22Rik | Mm.28129       | RIKEN cDNA 5730420B22 gene                                                    |
|  | H3126A12   | 0.0345                        | Pole4         | Mm.195753      | Polymerase (DNA-directed), epsilon 4 (p12 subunit)                            |
|  | H406754    | 0.0345                        | Thumpd1       | Mm.26392       | THUMP domain containing 1                                                     |
|  | H3023F01   | 0.0345                        | Zwilch        | Mm.335237      | Zwilch, kinetochore associated, homolog                                       |
|  | H3151F04   | 0.0346                        | Odf2          | Mm.330116      | Outer dense fiber of sperm tails 2                                            |
|  | H585381    | 0.0347                        | D15Wsu169e    | Mm.322931      | DNA segment, Chr 15, Wayne State University 169, expressed                    |
|  | H3082A03   | 0.0347                        | Glcci1        | Mm.210787      | Glucocorticoid induced transcript 1                                           |

|  | <b>NIA</b> | <b><math>\rho \leq</math></b> | <b>Common</b> | <b>Unigene</b> | <b>Name</b>                                                                       |
|--|------------|-------------------------------|---------------|----------------|-----------------------------------------------------------------------------------|
|  | H524155    | 0.0353                        | Ubqln1        | Mm.182053      | Ubiquilin 1                                                                       |
|  | H3026E11   | 0.0354                        | Rbm4b         | Mm.426068      | RNA binding motif protein 4B                                                      |
|  | H3048E04   | 0.0357                        | Etnk1         | Mm.272548      | Ethanolamine kinase 1                                                             |
|  | H3150C10   | 0.0359                        | 0610010D24Rik | Mm.156217      | RIKEN cDNA 0610010D24 gene                                                        |
|  | H3157C07   | 0.0359                        | Sgol2         | Mm.339711      | Shugoshin-like 2                                                                  |
|  | H3078D09   | 0.0359                        | Trim28        | Mm.15701       | Tripartite motif protein 28                                                       |
|  | H3003F10   | 0.0362                        | Id1           | Mm.444         | Inhibitor of DNA binding 1                                                        |
|  | H3139A07   | 0.0363                        | Stt3b         | Mm.296158      | STT3, subunit of the oligosaccharyltransferase complex, homolog B                 |
|  | H3055C08   | 0.0364                        | Rragc         | Mm.220922      | Ras-related GTP binding C                                                         |
|  | H3023D07   | 0.0364                        | Ttll5         | Mm.132172      | Tubulin tyrosine ligase-like family, member 5                                     |
|  | H719336    | 0.0367                        | Zxda          | Mm.426145      | Zinc finger, X-linked, duplicated A                                               |
|  | H3060A08   | 0.0368                        | 4933428G09Rik | Mm.29409       | RIKEN cDNA 4933428G09 gene                                                        |
|  | H3084F06   | 0.0368                        | Aup1          | Mm.235303      | Ancient ubiquitous protein                                                        |
|  | H3103H03   | 0.0370                        | C1galt1       | Mm.393184      | Core 1 UDP-galactose:N-acetylgalactosamine-alpha-R beta 1,3-galactosyltransferase |
|  | H614501    | 0.0370                        | Cpsf6         | Mm.288682      | Cleavage and polyadenylation specific factor 6                                    |
|  | H3077H08   | 0.0370                        | Rdh10         | Mm.274376      | Retinol dehydrogenase 10 (all-trans)                                              |
|  | H3115B01   | 0.0372                        | 2610002J23Rik | Mm.391799      | RIKEN cDNA 2610002J23 gene                                                        |
|  | H3025E07   | 0.0372                        | Adprh         | Mm.20047       | ADP-ribosylarginine hydrolase                                                     |
|  | H3094D02   | 0.0373                        | Gnb1          | Mm.2344        | Guanine nucleotide binding protein, beta 1                                        |
|  | H3081G08   | 0.0377                        | Arl4a         | Mm.12723       | ADP-ribosylation factor-like 4A                                                   |
|  | H572811    | 0.0381                        | Kns2          | Mm.325746      | Kinesin 2                                                                         |
|  | H3067E07   | 0.0382                        | Arhgap20      | Mm.26150       | Rho GTPase activating protein 20                                                  |
|  | H329599    | 0.0382                        | Prdm15        | Mm.328741      | PR domain containing 15                                                           |
|  | H3023B05   | 0.0382                        | Sumo3         | Mm.24433       | SMT3 suppressor of mif two 3 homolog 3                                            |
|  | H3118E08   | 0.0391                        | Ibtk          | Mm.22315       | Inhibitor of Bruton agammaglobulinemia tyrosine kinase                            |
|  | H3107B07   | 0.0391                        | Myst2         | Mm.205400      | MYST histone acetyltransferase 2                                                  |
|  | H3087B02   | 0.0392                        | Pogz          | Mm.274787      | Pogo transposable element with ZNF domain                                         |
|  | H3130B02   | 0.0393                        | Eif4e         | Mm.3941        | Eukaryotic translation initiation factor 4E                                       |
|  | H3108H07   | 0.0394                        | Cttn          | Mm.205601      | Cortactin                                                                         |
|  | H330584    | 0.0394                        | Moxd1         | Mm.285934      | Monoxygenase, DBH-like 1                                                          |
|  | H3132F10   | 0.0394                        | Tulp4         | Mm.28251       | Tubby like protein 4                                                              |
|  | H636116    | 0.0396                        | Aass          | Mm.18651       | Amino adipate-semialdehyde synthase                                               |
|  | H3109D06   | 0.0398                        | F8a           | Mm.165807      | Factor 8-associated gene A                                                        |
|  | H3040D02   | 0.0399                        | Egln1         | Mm.140619      | EGL nine homolog 1                                                                |
|  | H3062A04   | 0.0399                        | Rab32         | Mm.31486       | RAB32, member RAS oncogene family                                                 |
|  | H3118C07   | 0.0401                        | Hspd1         | Mm.378944      | Heat shock protein 1 (chaperonin)                                                 |

|  | <b>NIA</b> | <b><math>\rho \leq</math></b> | <b>Common</b>  | <b>Unigene</b> | <b>Name</b>                                                                            |
|--|------------|-------------------------------|----------------|----------------|----------------------------------------------------------------------------------------|
|  | H3032H03   | 0.0401                        | Satb1          | Mm.311655      | Special AT-rich sequence binding protein 1                                             |
|  | H3089E12   | 0.0401                        | Sema3c         | Mm.5071        | Sema domain, immunoglobulin domain (Ig), short basic domain, secreted, (semaphorin) 3C |
|  | H3036H01   | 0.0402                        | Edg2           | Mm.4772        | Endothelial differentiation, lysophosphatidic acid G-protein-coupled receptor, 2       |
|  | H580666    | 0.0402                        | Etfa           | Mm.290853      | Electron transferring flavoprotein, alpha polypeptide                                  |
|  | H524610    | 0.0407                        | Anln           | Mm.282751      | Anillin, actin binding protein+E769                                                    |
|  | H3148C06   | 0.0407                        | Eea1           | Mm.210035      | Early endosome antigen 1                                                               |
|  | H3122A05   | 0.0407                        | Il4            | Mm.276360      | Interleukin 4                                                                          |
|  | H3057C07   | 0.0408                        | data not found | Mm.410567      | Transcribed locus                                                                      |
|  | H3001A07   | 0.0409                        | BC002163       | Mm.375824      | CDNA sequence BC002163                                                                 |
|  | H575105    | 0.0409                        | Nfkb1          | Mm.256765      | Nuclear factor of kappa light chain gene enhancer in B-cells 1, p105                   |
|  | H3113H08   | 0.0410                        | Cul3           | Mm.12665       | Cullin 3                                                                               |
|  | H3067C12   | 0.0411                        | Jak2           | Mm.275839      | Janus kinase 2                                                                         |
|  | H570257    | 0.0412                        | Kctd10         | Mm.238285      | Potassium channel tetramerisation domain containing 10                                 |
|  | H3121F07   | 0.0412                        | Socs6          | Mm.91920       | Suppressor of cytokine signaling 6                                                     |
|  | H3071G09   | 0.0413                        | C030046E11Rik  | Mm.353838      | RIKEN cDNA C030046E11 gene                                                             |
|  | H3027G01   | 0.0413                        | Lsm2           | Mm.165735      | LSM2 homolog, U6 small nuclear RNA associated                                          |
|  | H3146C08   | 0.0413                        | Mcm6           | Mm.4933        | Minichromosome maintenance deficient 6 (MIS5 homolog                                   |
|  | H3103D12   | 0.0415                        | Dcamkl2        | Mm.44490       | Doublecortin and CaM kinase-like 2                                                     |
|  | H3097G01   | 0.0415                        | Mlx            | Mm.628         | MAX-like protein X                                                                     |
|  | H3050D10   | 0.0415                        | Tardbp         | Mm.22453       | TAR DNA binding protein                                                                |
|  | H3115D07   | 0.0416                        | Cops4          | Mm.957         | COP9 (constitutive photomorphogenic) homolog, subunit 4                                |
|  | H3149A01   | 0.0417                        | Ccnd3          | Mm.246520      | Cyclin D3                                                                              |
|  | H3101C11   | 0.0419                        | Ddhd1          | Mm.121918      | DDHD domain containing 1                                                               |
|  | H3061G10   | 0.0420                        | Ranbp17        | Mm.159019      | RAN binding protein 17                                                                 |
|  | H3060E07   | 0.0421                        | Exod1          | Mm.274160      | Exonuclease domain containing 1                                                        |
|  | H3020H08   | 0.0421                        | Fndc3b         | Mm.38832       | Fibronectin type III domain containing 3B                                              |
|  | H3097C04   | 0.0422                        | Xbp1           | Mm.434371      | X-box binding protein 1                                                                |
|  | H3025C03   | 0.0427                        | 4833439L19Rik  | Mm.24593       | RIKEN cDNA 4833439L19 gene                                                             |
|  | H3012C01   | 0.0428                        | Deb1           | Mm.24848       | Differentially expressed in B16F10 1                                                   |
|  | H3074H02   | 0.0431                        | Acbd3          | Mm.272981      | Acyl-Coenzyme A binding domain containing 3                                            |
|  | H331981    | 0.0431                        | Tmcc3          | Mm.23047       | Transmembrane and coiled coil domains 3                                                |
|  | H3009C02   | 0.0432                        | Sdad1          | Mm.86564       | SDA1 domain containing 1                                                               |
|  | H3017B07   | 0.0432                        | Supt16h        | Mm.286066      | Suppressor of Ty 16 homolog                                                            |
|  | H635131    | 0.0436                        | Bmp2k          | Mm.392853      | BMP2 inducible kinase                                                                  |
|  | H3153B08   | 0.0436                        | Gabra3         | Mm.102286      | Gamma-aminobutyric acid (GABA-A) receptor, subunit alpha 3                             |
|  | H3087F01   | 0.0437                        | Immt           | Mm.235123      | Inner membrane protein, mitochondrial                                                  |

|  | <b>NIA</b> | <b><math>\rho \leq</math></b> | <b>Common</b>  | <b>Unigene</b> | <b>Name</b>                                                            |
|--|------------|-------------------------------|----------------|----------------|------------------------------------------------------------------------|
|  | H577934    | 0.0437                        | Tsg101         | Mm.241334      | Tumor susceptibility gene 101                                          |
|  | H3052F01   | 0.0442                        | Dyrk2          | Mm.45565       | Dual-specificity tyrosine-(Y)-phosphorylation regulated kinase 2       |
|  | H3042C03   | 0.0444                        | Ap3m1          | Mm.386781      | Adaptor-related protein complex 3, mu 1 subunit                        |
|  | H3003F07   | 0.0444                        | Calm1          | Mm.285993      | Calmodulin 1                                                           |
|  | H3113G07   | 0.0445                        | Plcg2          | Mm.192699      | Phospholipase C, gamma 2                                               |
|  | H3121E10   | 0.0446                        | Eif1ay         | Mm.294623      | Eukaryotic translation initiation factor 1A, Y-linked                  |
|  | H3017H04   | 0.0446                        | Gatad2a        | Mm.270044      | GATA zinc finger domain containing 2A                                  |
|  | H3066A10   | 0.0446                        | Ndfip2         | Mm.290669      | Nedd4 family interacting protein 2                                     |
|  | H516176    | 0.0453                        | Pole3          | Mm.27444       | Polymerase (DNA directed), epsilon 3 (p17 subunit)                     |
|  | H3006A07   | 0.0455                        | Rcn2           | Mm.1782        | Reticulocalbin 2                                                       |
|  | H3069G07   | 0.0455                        | Unc50          | Mm.27404       | Unc-50 homolog                                                         |
|  | H3150E08   | 0.0462                        | Map4k5         | Mm.341948      | Mitogen-activated protein kinase kinase kinase kinase 5                |
|  | H3082C04   | 0.0463                        | 9030611O19Rik  | Mm.248938      | RIKEN cDNA 9030611O19 gene                                             |
|  | H3146C11   | 0.0463                        | Plekhb2        | Mm.292751      | Pleckstrin homology domain containing, family B (evectins) member 2    |
|  | H596983    | 0.0463                        | Tspan5         | Mm.31927       | Tetraspanin 5                                                          |
|  | H3002F11   | 0.0466                        | Lig3           | Mm.277136      | Ligase III, DNA, ATP-dependent                                         |
|  | H3013G07   | 0.0466                        | Tsn            | Mm.426637      | Translin                                                               |
|  | H3087G09   | 0.0469                        | Selk           | Mm.104491      | Selenoprotein K                                                        |
|  | H3130E07   | 0.0470                        | Snx8           | Mm.27098       | Sorting nexin 8                                                        |
|  | H3144F03   | 0.0472                        | Arpc5l         | Mm.38155       | Actin related protein 2/3 complex, subunit 5-like                      |
|  | H3092G09   | 0.0473                        | data not found | Mm.410501      | Transcribed locus, moderately similar to NP_997348.1 protein LOC400754 |
|  | H3047E10   | 0.0473                        | Isg20l2        | Mm.45744       | Interferon stimulated exonuclease gene 20-like 2                       |
|  | H3090B12   | 0.0473                        | Prune          | Mm.14155       | Prune homolog                                                          |
|  | H3058A05   | 0.0474                        | Prkg1          | Mm.381172      | Protein kinase, cGMP-dependent, type I                                 |
|  | H3041D08   | 0.0474                        | Zfp161         | Mm.29434       | Zinc finger protein 161                                                |
|  | H3028E09   | 0.0475                        | Grb10          | Mm.273117      | Growth factor receptor bound protein 10                                |
|  | H3055B08   | 0.0476                        | 9030416H16Rik  | Mm.278974      | RIKEN cDNA 9030416H16 gene                                             |
|  | H643832    | 0.0478                        | Ccnt2          | Mm.268672      | Cyclin T2                                                              |
|  | H3125E10   | 0.0478                        | Hmga2          | Mm.157190      | High mobility group AT-hook 2                                          |
|  | H3010H07   | 0.0478                        | Peli1          | Mm.28957       | Pellino 1                                                              |
|  | H3092B08   | 0.0478                        | Rpia           | Mm.17905       | Ribose 5-phosphate isomerase A                                         |
|  | H537175    | 0.0478                        | Tbc1d19        | Mm.28823       | TBC1 domain family, member 19                                          |
|  | H3144D04   | 0.0479                        | Ccdc98         | Mm.221269      | Coiled-coil domain containing 98                                       |
|  | H3148D08   | 0.0480                        | Dhdds          | Mm.100290      | Dehydrodolichyl diphosphate synthase                                   |
|  | H3045A11   | 0.0480                        | Gspt1          | Mm.325827      | G1 to S phase transition 1                                             |
|  | H3031C07   | 0.0481                        | 8430406I07Rik  | Mm.386817      | RIKEN cDNA 8430406I07 gene                                             |

|   | <b>NIA</b>                | <b><math>\rho \leq</math></b> | <b>Common</b> | <b>Unigene</b> | <b>Name</b>                                  |
|---|---------------------------|-------------------------------|---------------|----------------|----------------------------------------------|
|   | H3056E01                  | 0.0483                        | Arpc5         | Mm.288974      | Actin related protein 2/3 complex, subunit 5 |
|   | H580158                   | 0.0484                        | Qdpr          | Mm.30204       | Quinoid dihydropteridine reductase           |
|   | H3057H02                  | 0.0487                        | Prss35        | Mm.257629      | Protease, serine, 35                         |
|   | H3085B03                  | 0.0487                        | Rbm4          | Mm.426069      | RNA binding motif protein 4                  |
|   | H3087H05                  | 0.0490                        | Acat1         | Mm.293233      | Acetyl-Coenzyme A acetyltransferase 1        |
|   | H3089H02                  | 0.0490                        | Efna5         | Mm.435564      | Ephrin A5                                    |
|   | H3044D09                  | 0.0490                        | Scd1          | Mm.193096      | Stearoyl-Coenzyme A desaturase 1             |
|   | H651602                   | 0.0490                        | Tm4sf1        | Mm.856         | Transmembrane 4 superfamily member 1         |
|   | H3142C09                  | 0.0493                        | Sh3gl2        | Mm.143603      | SH3-domain GRB2-like 2                       |
|   | H3092A02                  | 0.0495                        | 2500002B13Rik | Mm.426240      | RIKEN cDNA 2500002B13 gene                   |
|   | H3021C02                  | 0.0495                        | Arpc4         | Mm.289306      | Actin related protein 2/3 complex, subunit 4 |
|   | H3114C07                  | 0.0495                        | Bmi1          | Mm.289584      | B lymphoma Mo-MLV insertion region 1         |
|   | H3077H01                  | 0.0497                        | AU019823      | Mm.335149      | Expressed sequence AU019823                  |
|   | H3130C07                  | 0.0497                        | Srfbp1        | Mm.100617      | Serum response factor binding protein 1      |
|   |                           |                               |               |                |                                              |
| ‡ | Detected in SAGE analysis |                               |               |                |                                              |
