# Supplementary material for: Ovarian gene expression in the absence of FIGLA, an oocyte-specific transcription factor
Source: PubMed Central journal article supplement (PMC1906760; doi:10.1186/1471-213x-7-67), 2007-06-13
Supplement: 1471-213X-7-67-S6.pdf [file 1471-213X-7-67-S6.pdf]

**Additional file 6 – False discovery rate analysis of newborn microarray: genes potentially down-regulated by FIGLA**

|  | <b>NIA</b> | <b><math>\rho \leq</math></b> | <b>Common</b>  | <b>Unigene</b> | <b>Name</b>                                                                                                      |
|--|------------|-------------------------------|----------------|----------------|------------------------------------------------------------------------------------------------------------------|
|  | H427063    | 0.0000                        | Tmem178        | Mm.357108      | Transmembrane protein 178                                                                                        |
|  | H3154D11   | 0.0000                        | Taf7l          | Mm.103259      | TAF7-like RNA polymerase II, TATA box binding protein (TBP)-associated factor                                    |
|  | H520363    | 0.0000                        | data not found | Mm.390888      | Transcribed locus, weakly similar to XP_001075088.1 similar to glyceraldehyde-3-phosphate dehydrogenase          |
|  | H636923    | 0.0000                        | data not found | Mm.393093      | Transcribed locus                                                                                                |
|  | H3083F09   | 0.0000                        | Phtf1          | Mm.385178      | Putative homeodomain transcription factor 1                                                                      |
|  | H335579    | 0.0000                        | Slc20a1        | Mm.272675      | Solute carrier family 20, member 1                                                                               |
|  | H3091F07   | 0.0000                        | Gm1564         | Mm.426692      | Gene model 1564, (NCBI)                                                                                          |
|  | H3039D12   | 0.0000                        | D6ErtD160e     | Mm.24985       | DNA segment, Chr 6, ERATO Doi 160, expressed                                                                     |
|  | H3046A06   | 0.0000                        | Auts2          | Mm.217323      | Autism susceptibility candidate 2                                                                                |
|  | H643709    | 0.0000                        | Tal1           | Mm.239869      | T-cell acute lymphocytic leukemia 1                                                                              |
|  | H651959    | 0.0000                        | B630005N14Rik  | Mm.354863      | RIKEN cDNA B630005N14 gene                                                                                       |
|  | H581004    | 0.0000                        | Elovl2         | Mm.2567        | Elongation of very long chain fatty acids+E58                                                                    |
|  | H3154E03   | 0.0000                        | Daam2          | Mm.211275      | Dishevelled associated activator of morphogenesis 2                                                              |
|  | H3089B04   | 0.0000                        | LOC433801      | Mm.276881      | Similar to RIKEN cDNA 6330416L07 gene                                                                            |
|  | H3076G04   | 0.0000                        | Cacnb2         | Mm.313930      | Calcium channel, voltage-dependent, beta 2 subunit                                                               |
|  | H3154A06   | 0.0000                        | Gng13          | Mm.171123      | Guanine nucleotide binding protein 13, gamma                                                                     |
|  | H3033B06   | 0.0000                        | Birc1c         | Mm.410435      | Baculoviral IAP repeat-containing 1c                                                                             |
|  | H3098F09   | 0.0001                        | Vamp8          | Mm.1838        | Vesicle-associated membrane protein 8                                                                            |
|  | H3037D10   | 0.0001                        | Creg1          | Mm.294885      | Cellular repressor of E1A-stimulated genes 1                                                                     |
|  | H3156F03   | 0.0001                        | Prpcp          | Mm.389969      | Prolylcarboxypeptidase (angiotensinase C)                                                                        |
|  | H334924    | 0.0001                        | Ilvbl          | Mm.2644        | IlvB (bacterial acetolactate synthase)-like                                                                      |
|  | H3121A01   | 0.0001                        | Ncam2          | Mm.364726      | Neural cell adhesion molecule 2                                                                                  |
|  | H316656    | 0.0001                        | Bex2           | Mm.94160       | Brain expressed X-linked 2                                                                                       |
|  | H3088F02   | 0.0001                        | D1Pas1         | Mm.108054      | DNA segment, Chr 1, Pasteur Institute 1                                                                          |
|  | H3083G04   | 0.0001                        | Jmjd1a         | Mm.260479      | Jumonji domain containing 1A                                                                                     |
|  | H3147B03   | 0.0001                        | Myl9           | Mm.271770      | Myosin, light polypeptide 9, regulatory                                                                          |
|  | H3113B02   | 0.0001                        | Rhbdd3         | Mm.260866      | Rhomboid domain containing 3                                                                                     |
|  | H3064E12   | 0.0001                        | Tsga10         | Mm.332756      | Testis specific 10                                                                                               |
|  | H482270    | 0.0001                        | Pam            | Mm.5121        | Peptidylglycine alpha-amidating monooxygenase                                                                    |
|  | H3138E11   | 0.0001                        | Sema4g         | Mm.34404       | Sema domain, immunoglobulin domain (Ig), transmembrane domain (TM) and short cytoplasmic domain, (semaphorin) 4G |
|  | H3128D05   | 0.0001                        | Six6os1        | Mm.242892      | Six6 opposite strand transcript 1                                                                                |
|  | H3155C04   | 0.0001                        | Ihpk1          | Mm.276155      | Inositol hexaphosphate kinase 1                                                                                  |
|  | H493561    | 0.0001                        | Cma1           | Mm.1252        | Chymase 1, mast cell                                                                                             |
|  | H3122H12   | 0.0001                        | Hba-a1         | Mm.196110      | Hemoglobin alpha, adult chain 1                                                                                  |
|  | H643386    | 0.0001                        | 2810008D09Rik  | Mm.393072      | RIKEN cDNA 2810008D09 gene                                                                                       |
|  | H3042D02   | 0.0002                        | Bag3           | Mm.84073       | Bcl2-associated athanogene 3                                                                                     |

|  | <b>NIA</b> | <b><math>\rho \leq</math></b> | <b>Common</b> | <b>Unigene</b> | <b>Name</b>                                                                                     |
|--|------------|-------------------------------|---------------|----------------|-------------------------------------------------------------------------------------------------|
|  | H3149C02   | 0.0002                        | Stag3         | Mm.285609      | Stromal antigen 3                                                                               |
|  | H3102A08   | 0.0002                        | Cst12         | Mm.280779      | Cystatin 12                                                                                     |
|  | H3104H05   | 0.0002                        | Rex2          | Mm.388922      | Reduced expression 2                                                                            |
|  | H476319    | 0.0002                        | Tsc22d3       | Mm.22216       | TSC22 domain family 3                                                                           |
|  | H3013D11   | 0.0002                        | Mt2           | Mm.147226      | Metallothionein 2                                                                               |
|  | H643249    | 0.0002                        | Wdr33         | Mm.277705      | WD repeat domain 33                                                                             |
|  | H3152H08   | 0.0002                        | Plp1          | Mm.1268        | Proteolipid protein (myelin) 1                                                                  |
|  | H3154E09   | 0.0002                        | Atp13a3       | Mm.8924        | ATPase type 13A3                                                                                |
|  | H3078E11   | 0.0002                        | Acsbg1        | Mm.20592       | Acyl-CoA synthetase bubblegum family member 1                                                   |
|  | H3141G03   | 0.0002                        | Hmgcs2        | Mm.289131      | 3-hydroxy-3-methylglutaryl-Coenzyme A synthase 2                                                |
|  | H3035D04   | 0.0003                        | Gm2a          | Mm.287807      | GM2 ganglioside activator protein                                                               |
|  | H3150H11   | 0.0003                        | AU020206      | Mm.200422      | Expressed sequence AU020206                                                                     |
|  | H614363    | 0.0003                        | Rnpc3         | Mm.316928      | RNA-binding region (RNP1, RRM) containing 3                                                     |
|  | H4019758   | 0.0003                        | Nek11         | Mm.347509      | NIMA (never in mitosis gene a)-related expressed kinase 11                                      |
|  | H3108A06   | 0.0003                        | Tnfrsf19      | Mm.281356      | Tumor necrosis factor receptor superfamily, member 19                                           |
|  | H3140A03   | 0.0003                        | Zfp503        | Mm.292401      | Zinc finger protein 503                                                                         |
|  | H3135E05   | 0.0004                        | A230106D06Rik | Mm.379388      | RIKEN cDNA A230106D06 gene                                                                      |
|  | H641739    | 0.0004                        | Lef1          | Mm.255219      | Lymphoid enhancer binding factor 1                                                              |
|  | H3059B12   | 0.0004                        | D330050I23Rik | Mm.230853      | RIKEN cDNA D330050I23 gene                                                                      |
|  | H3118G02   | 0.0004                        | Ptpn13        | Mm.3414        | Protein tyrosine phosphatase, non-receptor type 13                                              |
|  | H3034D10   | 0.0004                        | Zfp248        | Mm.212572      | Zinc finger protein 248                                                                         |
|  | H3025F11   | 0.0004                        | EG433273      | Mm.304088      | Predicted gene, EG433273                                                                        |
|  | H313136    | 0.0004                        | 4933417E01Rik | Mm.333647      | RIKEN cDNA 4933417E01 gene                                                                      |
|  | H3152D03   | 0.0004                        | C330002I19Rik | Mm.250641      | RIKEN cDNA C330002I19 gene                                                                      |
|  | H3108A04   | 0.0004                        | Clu           | Mm.200608      | Clusterin                                                                                       |
|  | H3036C11   | 0.0004                        | Luc7l2        | Mm.276133      | LUC7-like 2+E108                                                                                |
|  | H483686    | 0.0004                        | Zfp740        | Mm.352945      | Zinc finger protein 740                                                                         |
|  | H3031D03   | 0.0005                        | Aldoa         | Mm.275831      | Aldolase 1, A isoform                                                                           |
|  | H482191    | 0.0005                        | P4ha1         | Mm.2212        | Procollagen-proline, 2-oxoglutarate 4-dioxygenase (proline 4-hydroxylase), alpha 1 polypeptide  |
|  | H3012G09   | 0.0005                        | Fancc         | Mm.126106      | Fanconi anemia, complementation group C                                                         |
|  | H3098D09   | 0.0006                        | Adamts16      | Mm.115970      | A disintegrin-like and metalloproteinase (reprolysin type) with thrombospondin type 1 motif, 16 |
|  | H3126F11   | 0.0006                        | Mfge8         | Mm.1451        | Milk fat globule-EGF factor 8 protein                                                           |
|  | H3003C11   | 0.0006                        | 1110019N10Rik | Mm.279         | RIKEN cDNA 1110019N10 gene                                                                      |
|  | H3114C08   | 0.0006                        | Eraf          | Mm.423023      | Erythroid associated factor                                                                     |
|  | H3152D12   | 0.0006                        | Col3a1        | Mm.249555      | Procollagen, type III, alpha 1                                                                  |
|  | H614586    | 0.0006                        | Grem2         | Mm.25760       | Gremlin 2 homolog, cysteine knot superfamily                                                    |
|  | H3109D03   | 0.0006                        | Lamp2         | Mm.486         | Lysosomal membrane glycoprotein 2                                                               |
|  | H616738    | 0.0006                        | Tlr3          | Mm.33874       | Toll-like receptor 3                                                                            |
|  | H3108G05   | 0.0006                        | Gtf2h1        | Mm.22700       | General transcription factor II H, polypeptide 1                                                |
|  | H3147G12   | 0.0006                        | Aff3          | Mm.336679      | AF4/FMR2 family, member 3                                                                       |

|  | <b>NIA</b> | <b><math>\rho \leq</math></b> | <b>Common</b>  | <b>Unigene</b> | <b>Name</b>                                                                    |
|--|------------|-------------------------------|----------------|----------------|--------------------------------------------------------------------------------|
|  | H3101C10   | 0.0006                        | EG382450       | Mm.422788      | Predicted gene, EG382450                                                       |
|  | H658174    | 0.0006                        | Smg6           | Mm.288460      | Smg-6 homolog, nonsense mediated mRNA decay factor                             |
|  | H3112G09   | 0.0007                        | Atp6v0d1       | Mm.17708       | ATPase, H+ transporting, lysosomal V0 subunit D1                               |
|  | H3090D05   | 0.0007                        | data not found | Mm.410578      | Transcribed locus                                                              |
|  | H618819    | 0.0007                        | data not found | Mm.426407      | 16 days embryo head cDNA, RIKEN full-length enriched library, clone:C130083E18 |
|  | H3045B04   | 0.0007                        | Nlk            | Mm.9001        | Nemo like kinase                                                               |
|  | H371729    | 0.0007                        | Tnrc15         | Mm.23065       | Trinucleotide repeat containing 15                                             |
|  | H3079C06   | 0.0007                        | Zdhhc23        | Mm.327852      | Zinc finger, DHHC domain containing 23                                         |
|  | H3115F09   | 0.0007                        | Sgce           | Mm.8739        | Sarcoglycan, epsilon                                                           |
|  | H334928    | 0.0007                        | Lrp5           | Mm.274581      | Low density lipoprotein receptor-related protein 5                             |
|  | H3083C10   | 0.0007                        | data not found | Mm.426532      | Transcribed locus, moderately similar to XP_575695                             |
|  | H313341    | 0.0008                        | Bace2          | Mm.97885       | Beta-site APP-cleaving enzyme 2                                                |
|  | H3019G02   | 0.0008                        | Mbnl3          | Mm.295324      | Muscleblind-like 3+E135                                                        |
|  | H3099E06   | 0.0008                        | 3110007F17Rik  | Mm.292979      | RIKEN cDNA 3110007F17 gene                                                     |
|  | H3145H01   | 0.0008                        | Nxf2           | Mm.103155      | Nuclear RNA export factor 2                                                    |
|  | H3011C03   | 0.0008                        | Pcyox1         | Mm.30849       | Prenylcysteine oxidase 1                                                       |
|  | H3128F03   | 0.0009                        | Traf6          | Mm.292729      | Tnf receptor-associated factor 6                                               |
|  | H3151D11   | 0.0010                        | Psap           | Mm.277498      | Prosaposin                                                                     |
|  | H3121G05   | 0.0010                        | Cyp51          | Mm.46044       | Cytochrome P450, family 51                                                     |
|  | H3119C11   | 0.0010                        | Cdc42bpb       | Mm.27397       | Cdc42 binding protein kinase beta                                              |
|  | H574685    | 0.0010                        | Glt8d3         | Mm.22819       | Glycosyltransferase 8 domain containing 3                                      |
|  | H3046B11   | 0.0010                        | Gata6          | Mm.329287      | GATA binding protein 6                                                         |
|  | H3135H09   | 0.0011                        | Dip3b          | Mm.282985      | Dip3 beta                                                                      |
|  | H3128B04   | 0.0011                        | Lsr            | Mm.4067        | Lipolysis stimulated lipoprotein receptor                                      |
|  | H3043B09   | 0.0011                        | Cul4b          | Mm.327675      | Cullin 4B                                                                      |
|  | H3005D11   | 0.0011                        | Trim8          | Mm.392177      | Tripartite motif protein 8                                                     |
|  | H3149A03   | 0.0011                        | Speg           | Mm.275397      | SPEG complex locus                                                             |
|  | H596455    | 0.0012                        | Adcy7          | Mm.288206      | Adenylate cyclase 7                                                            |
|  | H3125A02   | 0.0012                        | EG666017       | Mm.425641      | Predicted gene, EG666017                                                       |
|  | H3047H09   | 0.0012                        | data not found | Mm.410559      | Transcribed locus, moderately similar to NP_001041426.1 protein LOC500712      |
|  | H3142E09   | 0.0012                        | Tssc4          | Mm.139675      | Tumor-suppressing subchromosomal transferable fragment 4                       |
|  | H3087F05   | 0.0013                        | Tsr2           | Mm.8142        | TSR2, 20S rRNA accumulation, homolog                                           |
|  | H3138C09   | 0.0013                        | Rnf128         | Mm.27764       | Ring finger protein 128                                                        |
|  | H352778    | 0.0013                        | St8sia4        | Mm.306228      | ST8 alpha-N-acetyl-neuraminide alpha-2,8-sialyltransferase 4                   |
|  | H3057F05   | 0.0013                        | Rabepk         | Mm.158705      | Rab9 effector protein with kelch motifs                                        |
|  | H3142F09   | 0.0013                        | Stx17          | Mm.171334      | Syntaxin 17                                                                    |
|  | H3099D04   | 0.0013                        | Cox5b          | Mm.288128      | Cytochrome c oxidase, subunit Vb                                               |
|  | H3127F11   | 0.0014                        | Ugcgl2         | Mm.213406      | UDP-glucose ceramide glucosyltransferase-like 2                                |
|  | H3152B05   | 0.0014                        | Hipk1          | Mm.20827       | Homeodomain interacting protein kinase 1                                       |
|  | H722834    | 0.0014                        | Dock2          | Mm.380679      | Dedicator of cyto-kinesis 2                                                    |

|  | <b>NIA</b> | <b><math>\rho \leq</math></b> | <b>Common</b>  | <b>Unigene</b> | <b>Name</b>                                                                              |
|--|------------|-------------------------------|----------------|----------------|------------------------------------------------------------------------------------------|
|  | H3137E11   | 0.0015                        | Il11ra1        | Mm.193451      | Interleukin 11 receptor, alpha chain 1                                                   |
|  | H598561    | 0.0015                        | Eif2ak4        | Mm.217616      | Eukaryotic translation initiation factor 2 alpha kinase 4                                |
|  | H3115H09   | 0.0015                        | Emx2           | Mm.245394      | Empty spiracles homolog 2+E165                                                           |
|  | H3061B11   | 0.0016                        | Pcdh9          | Mm.37126       | Protocadherin 9                                                                          |
|  | H636322    | 0.0016                        | Serpib9        | Mm.272569      | Serine (or cysteine) peptidase inhibitor, clade B, member 9                              |
|  | H3109A04   | 0.0016                        | Malat1         | Mm.298256      | Metastasis associated lung adenocarcinoma transcript 1 (non-coding RNA)                  |
|  | H3118H04   | 0.0016                        | data not found | Mm.388432      | Transcribed locus                                                                        |
|  | H3148F08   | 0.0018                        | Speer4a        | Mm.389607      | Spermatogenesis associated glutamate (E)-rich protein 4a                                 |
|  | H581667    | 0.0018                        | 2700007P21Rik  | Mm.381231      | RIKEN cDNA 2700007P21 gene                                                               |
|  | H575359    | 0.0018                        | data not found | Mm.426368      | 12 days embryo embryonic body+E226, RIKEN full-length enriched library, clone:9430093C18 |
|  | H580807    | 0.0019                        | D0HXS9928E     | Mm.4370        | DNA segment, human DXS9928E                                                              |
|  | H3032F06   | 0.0019                        | Hbb-b1         | Mm.288567      | Hemoglobin, beta adult major chain                                                       |
|  | H478560    | 0.0019                        | Hspb8          | Mm.21549       | Heat shock protein 8                                                                     |
|  | H3019C05   | 0.0019                        | AU022875       | Mm.426334      | Expressed sequence AU022875                                                              |
|  | H3117D06   | 0.0019                        | Sumf1          | Mm.379094      | Sulfatase modifying factor 1                                                             |
|  | H3131F05   | 0.0020                        | Tex101         | Mm.23385       | Testis expressed gene 101                                                                |
|  | H3095F05   | 0.0020                        | Tmem176a       | Mm.27061       | Transmembrane protein 176A                                                               |
|  | H3124B09   | 0.0021                        | App            | Mm.277585      | Amyloid beta (A4) precursor protein                                                      |
|  | H596846    | 0.0021                        | Morc3          | Mm.287329      | Microrchidia 3                                                                           |
|  | H3130C01   | 0.0021                        | 1200016E24Rik  | Mm.332931      | RIKEN cDNA 1200016E24 gene                                                               |
|  | H3140A09   | 0.0021                        | Cpt1a          | Mm.18522       | Carnitine palmitoyltransferase 1a, liver                                                 |
|  | H3139H12   | 0.0021                        | Hnrpa2b1       | Mm.155896      | Heterogeneous nuclear ribonucleoprotein A2/B1                                            |
|  | H3023H12   | 0.0021                        | Ldha           | Mm.29324       | Lactate dehydrogenase A                                                                  |
|  | H316867    | 0.0021                        | Dnm3os         | Mm.383186      | Dynamin 3, opposite strand                                                               |
|  | H3117G06   | 0.0023                        | Pygb           | Mm.222584      | Brain glycogen phosphorylase                                                             |
|  | H3127G12   | 0.0023                        | Amy2           | Mm.331313      | Amylase 2, pancreatic                                                                    |
|  | H2648673   | 0.0024                        | Phyhd1         | Mm.297949      | Phytanoyl-CoA dioxygenase domain containing 1                                            |
|  | H519148    | 0.0024                        | Tfrc           | Mm.28683       | Transferrin receptor                                                                     |
|  | H3109G05   | 0.0024                        | Pdgfd          | Mm.390122      | Platelet-derived growth factor, D polypeptide                                            |
|  | H573287    | 0.0024                        | EG666451       | Mm.390434      | Predicted gene, EG666451                                                                 |
|  | H720681    | 0.0024                        | Nfat5          | Mm.390057      | Nuclear factor of activated T-cells 5                                                    |
|  | H636169    | 0.0024                        | Kihl5          | Mm.10281       | Kelch-like 5+E194                                                                        |
|  | H622781    | 0.0025                        | Samd9l         | Mm.196013      | Sterile alpha motif domain containing 9-like                                             |
|  | H3056B11   | 0.0025                        | Dnaja3         | Mm.325524      | DnaJ (Hsp40) homolog, subfamily A, member 3                                              |
|  | H620197    | 0.0026                        | 3110043O21Rik  | Mm.331544      | RIKEN cDNA 3110043O21 gene                                                               |
|  | H3109H12   | 0.0026                        | Tmem176b       | Mm.28385       | Transmembrane protein 176B                                                               |
|  | H3070E05   | 0.0027                        | Nol4           | Mm.209896      | Nucleolar protein 4                                                                      |
|  | H3134D04   | 0.0028                        | Hk1            | Mm.196605      | Hexokinase 1                                                                             |
|  | H3145D10   | 0.0028                        | Kcnd2          | Mm.320691      | Potassium voltage-gated channel, Shal-related family, member 2                           |
|  | H3157B02   | 0.0028                        | Cd200          | Mm.245851      | Cd200 antigen                                                                            |

|  | <b>NIA</b> | <b><math>\rho \leq</math></b> | <b>Common</b>  | <b>Unigene</b> | <b>Name</b>                                                                                       |
|--|------------|-------------------------------|----------------|----------------|---------------------------------------------------------------------------------------------------|
|  | H3669923   | 0.0028                        | data not found | Mm.30806       | Transcribed locus, moderately similar to XP_362236.1 protein MG04681.4 [Magnaporthe grisea 70-15] |
|  | H596904    | 0.0029                        | Smpdl3a        | Mm.2379        | Sphingomyelin phosphodiesterase, acid-like 3A                                                     |
|  | H3069D09   | 0.0030                        | Ankra2         | Mm.209642      | Ankyrin repeat, family A (RFXANK-like), 2                                                         |
|  | H3122E12   | 0.0030                        | Atp5b          | Mm.238973      | ATP synthase, H <sup>+</sup> transporting mitochondrial F1 complex, beta subunit                  |
|  | H3138F12   | 0.0031                        | Sdc4           | Mm.3815        | Syndecan 4                                                                                        |
|  | H3097B10   | 0.0032                        | Mll5           | Mm.205190      | Myeloid/lymphoid or mixed-lineage leukemia 5                                                      |
|  | H3024D11   | 0.0032                        | Kif7           | Mm.101633      | Kinesin family member 7                                                                           |
|  | H3068H08   | 0.0032                        | Zfp53          | Mm.42140       | Zinc finger protein 53                                                                            |
|  | H3064B09   | 0.0032                        | Heatr1         | Mm.342328      | HEAT repeat containing 1                                                                          |
|  | H3010B04   | 0.0033                        | Wdr75          | Mm.270376      | WD repeat domain 75                                                                               |
|  | H3066C06   | 0.0033                        | Sfpq           | Mm.257276      | Splicing factor proline/glutamine rich (polypyrimidine tract binding protein associated)          |
|  | H3080D05   | 0.0034                        | Stk4           | Mm.234472      | Serine/threonine kinase 4                                                                         |
|  | H3148D04   | 0.0034                        | Maged1         | Mm.27578       | Melanoma antigen, family D, 1                                                                     |
|  | H568119    | 0.0034                        | Prnd           | Mm.180750      | Prion protein dublet                                                                              |
|  | H3115G09   | 0.0034                        | Hba-x          | Mm.141758      | Hemoglobin X, alpha-like embryonic chain in Hba complex                                           |
|  | H514319    | 0.0034                        | Ndufa5         | Mm.275780      | NADH dehydrogenase (ubiquinone) 1 alpha subcomplex, 5                                             |
|  | H3145H05   | 0.0035                        | Ankrd47        | Mm.196330      | Ankyrin repeat domain 47                                                                          |
|  | H662847    | 0.0035                        | Hnrpul2        | Mm.347805      | Heterogeneous nuclear ribonucleoprotein U-like 2                                                  |
|  | H3113A12   | 0.0035                        | Gas5           | Mm.270065      | Growth arrest specific 5                                                                          |
|  | H3090A03   | 0.0035                        | Dmt2           | Mm.11171       | Dorso-medial telencephalon gene 2                                                                 |
|  | H3130B05   | 0.0035                        | Gemin4         | Mm.188413      | Gem (nuclear organelle) associated protein 4                                                      |
|  | H3118D03   | 0.0035                        | Arbp           | Mm.5286        | Acidic ribosomal phosphoprotein P0                                                                |
|  | H599017    | 0.0035                        | Prdx3          | Mm.29821       | Peroxiredoxin 3                                                                                   |
|  | H636312    | 0.0036                        | data not found | Mm.269151      | Transcribed locus                                                                                 |
|  | H596896    | 0.0036                        | Pex12          | Mm.102205      | Peroxisomal biogenesis factor 12                                                                  |
|  | H3123D05   | 0.0036                        | Pygl           | Mm.256926      | Liver glycogen phosphorylase                                                                      |
|  | H355433    | 0.0037                        | Trim46         | Mm.331156      | Tripartite motif protein 46                                                                       |
|  | H3156D09   | 0.0037                        | Epb4.1         | Mm.30038       | Erythrocyte protein band 4.1                                                                      |
|  | H3111A09   | 0.0037                        | 4921511K06Rik  | Mm.251303      | RIKEN cDNA 4921511K06 gene                                                                        |
|  | H3031D04   | 0.0038                        | Ptp4a1         | Mm.374437      | Protein tyrosine phosphatase 4a1                                                                  |
|  | H403610    | 0.0038                        | Ykt6           | Mm.294821      | YKT6 homolog+E233                                                                                 |
|  | H3156E12   | 0.0038                        | Smc1b          | Mm.182737      | Structural maintenance of chromosomes 1B                                                          |
|  | H386829    | 0.0038                        | Stk38          | Mm.435098      | Serine/threonine kinase 38                                                                        |
|  | H317273    | 0.0039                        | 2310036O22Rik  | Mm.196005      | RIKEN cDNA 2310036O22 gene                                                                        |
|  | H3101H03   | 0.0039                        | Chmp2b         | Mm.432944      | Chromatin modifying protein 2B                                                                    |
|  | H620242    | 0.0039                        | B230325K18Rik  | Mm.32145       | RIKEN cDNA B230325K18 gene                                                                        |
|  | H3084H03   | 0.0040                        | 1600020E01Rik  | Mm.349174      | RIKEN cDNA 1600020E01 gene                                                                        |
|  | H3157D01   | 0.0040                        | Got2           | Mm.230169      | Glutamate oxaloacetate transaminase 2, mitochondrial                                              |
|  | H641939    | 0.0040                        | Lrrfip1        | Mm.45039       | Leucine rich repeat (in FLII) interacting protein 1                                               |
|  | H598351    | 0.0040                        | Mocs2          | Mm.19027       | Molybdenum cofactor synthesis 2                                                                   |

|  | <b>NIA</b> | <b><math>\rho \leq</math></b> | <b>Common</b>        | <b>Unigene</b> | <b>Name</b>                                                                       |
|--|------------|-------------------------------|----------------------|----------------|-----------------------------------------------------------------------------------|
|  | H3121C06   | 0.0041                        | Rag1ap1              | Mm.17958       | Recombination activating gene 1 activating protein 1                              |
|  | H3136G06   | 0.0041                        | Rpl13a               | Mm.180458      | Ribosomal protein L13a                                                            |
|  | H3112B07   | 0.0042                        | Acaa2                | Mm.245724      | Acetyl-Coenzyme A acyltransferase 2 (mitochondrial 3-oxoacyl-Coenzyme A thiolase) |
|  | H3017B11   | 0.0042                        | Pgrmc1               | Mm.9052        | Progesterone receptor membrane component 1                                        |
|  | H3144A04   | 0.0042                        | Sacs                 | Mm.103675      | Sacsin                                                                            |
|  | H3132E04   | 0.0043                        | Ndfip1               | Mm.102496      | Nedd4 family interacting protein 1                                                |
|  | H3079D12   | 0.0043                        | Pld3                 | Mm.6483        | Phospholipase D family, member 3                                                  |
|  | H3025H11   | 0.0044                        | Pcmt2                | Mm.271986      | Protein-L-isoaspartate (D-aspartate) O-methyltransferase domain containing 2      |
|  | H619921    | 0.0044                        | <i>C030011O14Rik</i> | Mm.135018      | RIKEN cDNA C030011O14 gene                                                        |
|  | H3035E12   | 0.0044                        | data not found       | Mm.410553      | Transcribed locus                                                                 |
|  | H578171    | 0.0044                        | Il7r                 | Mm.389         | Interleukin 7 receptor                                                            |
|  | H635976    | 0.0045                        | Synj2bp              | Mm.279603      | Synaptojanin 2 binding protein                                                    |
|  | H3005H12   | 0.0045                        | Son                  | Mm.46401       | Son cell proliferation protein                                                    |
|  | H3117A05   | 0.0046                        | Dync1h1              | Mm.181430      | Dynein cytoplasmic 1 heavy chain 1                                                |
|  | H3034C03   | 0.0046                        | data not found       | Mm.410552      | Transcribed locus, moderately similar to XP_575144.1 similar to LRRGT00150        |
|  | H482535    | 0.0046                        | Atp1a1               | Mm.280103      | ATPase, Na <sup>+</sup> /K <sup>+</sup> transporting, alpha 1 polypeptide         |
|  | H3047F12   | 0.0046                        | Atf6                 | Mm.377046      | Activating transcription factor 6                                                 |
|  | H722408    | 0.0046                        | Mllt6                | Mm.23685       | Myeloid/lymphoid or mixed lineage-leukemia translocation to 6 homolog             |
|  | H614970    | 0.0049                        | 3321401G04Rik        | Mm.24652       | RIKEN cDNA 3321401G04 gene                                                        |
|  | H651726    | 0.0050                        | Tanc2                | Mm.22501       | Tetratricopeptide repeat, ankyrin repeat and coiled-coil containing 2             |
|  | H3126B08   | 0.0051                        | Pla2g7               | Mm.9277        | Phospholipase A2, group VII (platelet-activating factor acetylhydrolase, plasma)  |
|  | H334851    | 0.0051                        | Fbxo17               | Mm.358659      | F-box protein 17                                                                  |
|  | H3125H05   | 0.0051                        | Rps3a                | Mm.399829      | Ribosomal protein S3a                                                             |
|  | H3109F10   | 0.0051                        | Mal2                 | Mm.434394      | Mal, T-cell differentiation protein 2                                             |
|  | H603970    | 0.0052                        | Lmtk3                | Mm.44928       | Lemur tyrosine kinase 3                                                           |
|  | H3029D06   | 0.0052                        | Tubb5                | Mm.432391      | Tubulin, beta 5                                                                   |
|  | H515230    | 0.0053                        | 4930550L11Rik        | Mm.391968      | RIKEN cDNA 4930550L11 gene                                                        |
|  | H3077D05   | 0.0054                        | Npc2                 | Mm.282556      | Niemann Pick type C2                                                              |
|  | H3072B09   | 0.0054                        | 3110068G20Rik        | Mm.392589      | RIKEN cDNA 3110068G20 gene                                                        |
|  | H3711711   | 0.0054                        | Stat5b               | Mm.34064       | Signal transducer and activator of transcription 5B                               |
|  | H3079G08   | 0.0055                        | Ufc1                 | Mm.2815        | Ubiquitin-fold modifier conjugating enzyme 1                                      |
|  | H3058C05   | 0.0055                        | Cyp11a1              | Mm.302865      | Cytochrome P450, family 11, subfamily a, polypeptide 1                            |
|  | H3146F11   | 0.0055                        | Nrbp2                | Mm.101946      | Nuclear receptor binding protein 2                                                |
|  | H3140F04   | 0.0055                        | Anxa6                | Mm.265347      | Annexin A6                                                                        |
|  | H3042C02   | 0.0056                        | Pqlc1                | Mm.29247       | PQ loop repeat containing 1                                                       |
|  | H3135H12   | 0.0056                        | Ccdc64               | Mm.233914      | Coiled-coil domain containing 64                                                  |
|  | H596025    | 0.0056                        | D830007B15Rik        | Mm.434319      | RIKEN cDNA D830007B15 gene                                                        |
|  | H3115A11   | 0.0056                        | Nod1                 | Mm.28498       | Nucleotide-binding oligomerization domain containing 1                            |
|  | H599930    | 0.0056                        | data not found       | Mm.383435      | Transcribed locus                                                                 |
|  | H3123B06   | 0.0056                        | Edd1                 | Mm.275426      | E3 ubiquitin protein ligase, HECT domain containing, 1                            |

|  | <b>NIA</b> | <b><math>\rho \leq</math></b> | <b>Common</b>  | <b>Unigene</b> | <b>Name</b>                                                                                           |
|--|------------|-------------------------------|----------------|----------------|-------------------------------------------------------------------------------------------------------|
|  | H3143B05   | 0.0057                        | Rbm39          | Mm.392436      | RNA binding motif protein 39                                                                          |
|  | H3023A11   | 0.0058                        | Esf1           | Mm.21228       | ESF1, nucleolar pre-rRNA processing protein, homolog                                                  |
|  | H3144D09   | 0.0059                        | Slc35d2        | Mm.133731      | Solute carrier family 35, member D2                                                                   |
|  | H3128E04   | 0.0059                        | Opn1sw         | Mm.56987       | Opsin 1 (cone pigments), short-wave-sensitive (color blindness, tritan)                               |
|  | H3151F05   | 0.0060                        | Pkp2           | Mm.2252        | Plakophilin 2                                                                                         |
|  | H3147B06   | 0.0061                        | Gnaq           | Mm.391165      | Guanine nucleotide binding protein, alpha q polypeptide                                               |
|  | H596885    | 0.0061                        | data not found | Mm.364924      | Transcribed locus                                                                                     |
|  | H3134E06   | 0.0061                        | 3930401B19Rik  | Mm.391849      | RIKEN cDNA 3930401B19 gene                                                                            |
|  | H3111H06   | 0.0061                        | Kcnb2          | Mm.382301      | Potassium voltage gated channel, Shab-related subfamily, member 2                                     |
|  | H3086G06   | 0.0062                        | C330024D21Rik  | Mm.387187      | RIKEN cDNA C330024D21 gene                                                                            |
|  | H3024B02   | 0.0062                        | Sec61a1        | Mm.28375       | Sec61 alpha 1 subunit+E316                                                                            |
|  | H635962    | 0.0062                        | Tfdp2          | Mm.390208      | Transcription factor Dp 2                                                                             |
|  | H3136H05   | 0.0063                        | Atp5g1         | Mm.371547      | ATP synthase, H <sup>+</sup> transporting, mitochondrial F0 complex, subunit c (subunit 9), isoform 1 |
|  | H614369    | 0.0063                        | Rab31          | Mm.29274       | RAB31, member RAS oncogene family                                                                     |
|  | H575476    | 0.0063                        | Hmgcl          | Mm.297251      | 3-hydroxy-3-methylglutaryl-Coenzyme A lyase                                                           |
|  | H3041B12   | 0.0064                        | Tug1           | Mm.390314      | Taurine upregulated gene 1                                                                            |
|  | H3110F06   | 0.0065                        | Pkia           | Mm.3193        | Protein kinase inhibitor, alpha                                                                       |
|  | H573951    | 0.0065                        | Klhl26         | Mm.187090      | Kelch-like 26+E496                                                                                    |
|  | H576753    | 0.0065                        | Rbm4b          | Mm.426068      | RNA binding motif protein 4B                                                                          |
|  | H637845    | 0.0066                        | data not found | Mm.4913        | Transcribed locus                                                                                     |
|  | H3152B08   | 0.0066                        | Dnajc15        | Mm.248046      | DnaJ (Hsp40) homolog, subfamily C, member 15                                                          |
|  | H3112D03   | 0.0066                        | Pex19          | Mm.247764      | Peroxisome biogenesis factor 19                                                                       |
|  | H347933    | 0.0066                        | Ddah2          | Mm.1457        | Dimethylarginine dimethylaminohydrolase 2                                                             |
|  | H570043    | 0.0066                        | Gipc1          | Mm.20945       | GIPC PDZ domain containing family, member 1                                                           |
|  | H621840    | 0.0067                        | Srgap3         | Mm.236401      | SLIT-ROBO Rho GTPase activating protein 3                                                             |
|  | H3063G06   | 0.0067                        | data not found | Mm.173536      | Transcribed locus                                                                                     |
|  | H3116H04   | 0.0067                        | Pggt1b         | Mm.393044      | Protein geranylgeranyltransferase type I, beta subunit                                                |
|  | H642365    | 0.0067                        | Centg2         | Mm.291135      | Centaurin, gamma 2                                                                                    |
|  | H3127B06   | 0.0069                        | Kitl           | Mm.45124       | Kit ligand                                                                                            |
|  | H355186    | 0.0070                        | Tmem86a        | Mm.27338       | Transmembrane protein 86A                                                                             |
|  | H3130F05   | 0.0071                        | Crsp2          | Mm.17616       | Cofactor required for Sp1 transcriptional activation, subunit 2                                       |
|  | H481530    | 0.0071                        | Arf3           | Mm.221298      | ADP-ribosylation factor 3                                                                             |
|  | H3010C07   | 0.0071                        | Irx3           | Mm.238044      | Iroquois related homeobox 3                                                                           |
|  | H3005F06   | 0.0072                        | Irak1          | Mm.38241       | Interleukin-1 receptor-associated kinase 1                                                            |
|  | H3129C03   | 0.0072                        | Slc4a1         | Mm.7248        | Solute carrier family 4 (anion exchanger), member 1                                                   |
|  | H3027E09   | 0.0072                        | Eno1           | Mm.70666       | Enolase 1, alpha non-neuron                                                                           |
|  | H419490    | 0.0072                        | Iqce           | Mm.179704      | IQ motif containing E                                                                                 |
|  | H3009B05   | 0.0072                        | Rpl27a         | Mm.305750      | Ribosomal protein L27a                                                                                |
|  | H3073D08   | 0.0073                        | data not found | Mm.423302      | RNA binding site for Dazl protein, clone kc7                                                          |
|  | H3058E09   | 0.0074                        | Dgke           | Mm.153695      | Diacylglycerol kinase, epsilon                                                                        |

|  | <b>NIA</b> | <b><math>\rho \leq</math></b> | <b>Common</b>  | <b>Unigene</b> | <b>Name</b>                                                                                   |
|--|------------|-------------------------------|----------------|----------------|-----------------------------------------------------------------------------------------------|
|  | H3099F04   | 0.0074                        | Fnbp4          | Mm.314887      | Formin binding protein 4                                                                      |
|  | H404427    | 0.0074                        | Pdgfa          | Mm.2675        | Platelet derived growth factor, alpha                                                         |
|  | H3113H03   | 0.0074                        | Ddx26b         | Mm.72753       | DEAD/H (Asp-Glu-Ala-Asp/His) box polypeptide 26B                                              |
|  | H637208    | 0.0078                        | data not found | Mm.34484       | Transcribed locus                                                                             |
|  | H3112D10   | 0.0078                        | Wdr89          | Mm.341719      | WD repeat domain 89                                                                           |
|  | H3044D11   | 0.0078                        | C4bp           | Mm.306720      | Complement component 4 binding protein                                                        |
|  | H3120H05   | 0.0080                        | Sdha           | Mm.158231      | Succinate dehydrogenase complex, subunit A, flavoprotein (Fp)                                 |
|  | H3137H06   | 0.0081                        | Aes            | Mm.180013      | Amino-terminal enhancer of split                                                              |
|  | H637814    | 0.0081                        | data not found | Mm.30630       | Transcribed locus                                                                             |
|  | H331449    | 0.0081                        | Lemd2          | Mm.29689       | LEM domain containing 2                                                                       |
|  | H597897    | 0.0081                        | C330002G24Rik  | Mm.361682      | RIKEN cDNA C330002G24 gene                                                                    |
|  | H3107B09   | 0.0082                        | Tfb2m          | Mm.293529      | Transcription factor B2, mitochondrial                                                        |
|  | H619261    | 0.0082                        | 4930546H06Rik  | Mm.227456      | RIKEN cDNA 4930546H06 gene                                                                    |
|  | H3134F11   | 0.0083                        | Men1           | Mm.12917       | Multiple endocrine neoplasia 1                                                                |
|  | H652719    | 0.0083                        | Zfp96          | Mm.24124       | Zinc finger protein 96                                                                        |
|  | H574155    | 0.0083                        | H2-Eb1         | Mm.22564       | Histocompatibility 2, class II antigen E beta                                                 |
|  | H3158F11   | 0.0084                        | Nnp1           | Mm.38344       | Novel nuclear protein 1                                                                       |
|  | H3117D07   | 0.0084                        | Cd63           | Mm.277857      | Cd63 antigen                                                                                  |
|  | H3137G08   | 0.0084                        | Gab2           | Mm.42033       | Growth factor receptor bound protein 2-associated protein 2                                   |
|  | H3030D10   | 0.0085                        | Pkm2           | Mm.326167      | Pyruvate kinase, muscle                                                                       |
|  | H3139F09   | 0.0085                        | Mccc1          | Mm.425129      | Methylcrotonoyl-Coenzyme A carboxylase 1 (alpha)                                              |
|  | H3056H09   | 0.0086                        | Fndc5          | Mm.44075       | Fibronectin type III domain containing 5                                                      |
|  | H3125G06   | 0.0089                        | Rpl31          | Mm.379302      | Ribosomal protein L31                                                                         |
|  | H367410    | 0.0089                        | Chgb           | Mm.255241      | Chromogranin B                                                                                |
|  | H618848    | 0.0093                        | Ltbp1          | Mm.269747      | Latent transforming growth factor beta binding protein 1                                      |
|  | H3116F03   | 0.0093                        | data not found | Mm.275414      | Transcribed locus                                                                             |
|  | H3103B10   | 0.0094                        | 1700095A21Rik  | Mm.393245      | RIKEN cDNA 1700095A21 gene                                                                    |
|  | H427644    | 0.0094                        | Aplp1          | Mm.2381        | Amyloid beta (A4) precursor-like protein 1                                                    |
|  | H3132D09   | 0.0095                        | Usp3           | Mm.38976       | Ubiquitin specific peptidase 3                                                                |
|  | H3116G06   | 0.0096                        | Adamts6        | Mm.208125      | A disintegrin-like and metallopeptidase (reprolysin type) with thrombospondin type 1 motif, 6 |
|  | H3090A05   | 0.0096                        | data not found | Mm.26003       | Transcribed locus                                                                             |
|  | H615776    | 0.0098                        | Ppp2r5e        | Mm.259626      | Protein phosphatase 2, regulatory subunit B (B56), epsilon isoform                            |
|  | H618006    | 0.0100                        | data not found | Mm.384709      | Transcribed locus                                                                             |
|  | H3098G02   | 0.0100                        | data not found | Mm.410503      | Transcribed locus                                                                             |
|  | H3098H04   | 0.0101                        | Zbtb20         | Mm.136238      | Zinc finger and BTB domain containing 20                                                      |
|  | H3069E09   | 0.0102                        | Atp1b2         | Mm.235204      | ATPase, Na <sup>+</sup> /K <sup>+</sup> transporting, beta 2 polypeptide                      |
|  | H3150C09   | 0.0102                        | Limk2          | Mm.390323      | LIM motif-containing protein kinase 2                                                         |
|  | H3060A11   | 0.0102                        | Pbx3           | Mm.239941      | Pre B-cell leukemia transcription factor 3                                                    |
|  | H3134C11   | 0.0103                        | Gars           | Mm.250004      | Glycyl-tRNA synthetase                                                                        |
|  | H3081B05   | 0.0104                        | Mier1          | Mm.288721      | Mesoderm induction early response 1 homolog                                                   |

|  | <b>NIA</b> | <b><math>\rho \leq</math></b> | <b>Common</b>  | <b>Unigene</b> | <b>Name</b>                                                                    |
|--|------------|-------------------------------|----------------|----------------|--------------------------------------------------------------------------------|
|  | H3142G06   | 0.0105                        | 2610005L07Rik  | Mm.359054      | RIKEN cDNA 2610005L07 gene                                                     |
|  | H3068D02   | 0.0106                        | data not found | Mm.351390      | Transcribed locus                                                              |
|  | H3036E04   | 0.0107                        | Magi2          | Mm.332231      | Membrane associated guanylate kinase, WW and PDZ domain containing 2           |
|  | H331081    | 0.0110                        | Slc6a2         | Mm.57040       | Solute carrier family 6 (neurotransmitter transporter, noradrenalin), member 2 |
|  | H402902    | 0.0112                        | Arfp2          | Mm.41637       | ADP-ribosylation factor interacting protein 2                                  |
|  | H3034C05   | 0.0112                        | D230025D16Rik  | Mm.334761      | RIKEN cDNA D230025D16 gene                                                     |
|  | H3068H12   | 0.0113                        | Dock4          | Mm.341423      | Dedicator of cytokinesis 4                                                     |
|  | H3107H11   | 0.0114                        | 4930451C15Rik  | Mm.38634       | RIKEN cDNA 4930451C15 gene                                                     |
|  | H3023D12   | 0.0114                        | E4f1           | Mm.163132      | E4F transcription factor 1                                                     |
|  | H3048D12   | 0.0114                        | Gnpat1         | Mm.312945      | Glucosamine-phosphate N-acetyltransferase 1                                    |
|  | H539393    | 0.0115                        | 2610002F03Rik  | Mm.27103       | RIKEN cDNA 2610002F03 gene                                                     |
|  | H3045F08   | 0.0115                        | Tktl1          | Mm.25057       | Transketolase-like 1                                                           |
|  | H3114C04   | 0.0116                        | Trim44         | Mm.315002      | Tripartite motif-containing 44                                                 |
|  | H3127F04   | 0.0117                        | Chst11         | Mm.360747      | Carbohydrate sulfotransferase 11                                               |
|  | H3032F09   | 0.0117                        | Lnpep          | Mm.328807      | Leucyl/cystinyl aminopeptidase                                                 |
|  | H3158F12   | 0.0118                        | 1700020I14Rik  | Mm.379181      | RIKEN cDNA 1700020I14 gene                                                     |
|  | H3111H03   | 0.0118                        | Nfia           | Mm.31274       | Nuclear factor I/A                                                             |
|  | H3063E06   | 0.0120                        | 4930422I07Rik  | Mm.259988      | RIKEN cDNA 4930422I07 gene                                                     |
|  | H3116B06   | 0.0120                        | Snn            | Mm.325800      | Stannin                                                                        |
|  | H3149B12   | 0.0123                        | Pabpn1         | Mm.7723        | Poly(A) binding protein, nuclear 1                                             |
|  | H3023G10   | 0.0126                        | Nkiras2        | Mm.274734      | NFKB inhibitor interacting Ras-like protein 2                                  |
|  | H3088E04   | 0.0127                        | Csnk1a1        | Mm.26908       | Casein kinase 1, alpha 1                                                       |
|  | H3153H05   | 0.0127                        | Peci           | Mm.28883       | Peroxisomal delta3, delta2-enoyl-Coenzyme A isomerase                          |
|  | H3133D11   | 0.0129                        | Zfp623         | Mm.273264      | Zinc finger protein 623                                                        |
|  | H3013F01   | 0.0130                        | Alad           | Mm.6988        | Aminolevulinate, delta-, dehydratase                                           |
|  | H3120H03   | 0.0130                        | Alcam          | Mm.288282      | Activated leukocyte cell adhesion molecule                                     |
|  | H354692    | 0.0130                        | Alkbh3         | Mm.272498      | AlkB, alkylation repair homolog 3 (E. coli)                                    |
|  | H3079H05   | 0.0131                        | Baz2b          | Mm.228071      | Bromodomain adjacent to zinc finger domain, 2B                                 |
|  | H3152F01   | 0.0131                        | Cryl1          | Mm.25539       | Crystallin, lambda 1                                                           |
|  | H3067D12   | 0.0132                        | 2310008H04Rik  | Mm.244703      | RIKEN cDNA 2310008H04 gene                                                     |
|  | H3143H01   | 0.0132                        | LOC436089      | Mm.426985      | Similar to matrilin 1, cartilage matrix protein                                |
|  | H3154B03   | 0.0133                        | Frap1          | Mm.21158       | FK506 binding protein 12-rapamycin associated protein 1                        |
|  | H3084H11   | 0.0133                        | Stk40          | Mm.41865       | Serine/threonine kinase 40                                                     |
|  | H3158A04   | 0.0134                        | E330013P04Rik  | Mm.245813      | RIKEN cDNA E330013P04 gene                                                     |
|  | H520179    | 0.0134                        | Laptm4b        | Mm.197518      | Lysosomal-associated protein transmembrane 4B                                  |
|  | H3064C11   | 0.0136                        | A130040M12Rik  | Mm.391766      | RIKEN cDNA A130040M12 gene                                                     |
|  | H3150F06   | 0.0136                        | Fnta           | Mm.3496        | Farnesyltransferase, CAAX box, alpha                                           |
|  | H3095E04   | 0.0140                        | Camk2b         | Mm.4857        | Calcium/calmodulin-dependent protein kinase II, beta                           |
|  | H3093F09   | 0.0140                        | Gpr98          | Mm.288694      | G protein-coupled receptor 98                                                  |
|  | H3139B10   | 0.0140                        | Slk            | Mm.281011      | STE20-like kinase+E402                                                         |

|  | <b>NIA</b> | <b><math>\rho \leq</math></b> | <b>Common</b>  | <b>Unigene</b> | <b>Name</b>                                                                                      |
|--|------------|-------------------------------|----------------|----------------|--------------------------------------------------------------------------------------------------|
|  | H3060H05   | 0.0141                        | Cflar          | Mm.11778       | CASP8 and FADD-like apoptosis regulator                                                          |
|  | H552564    | 0.0142                        | Xpo7           | Mm.152987      | Exportin 7                                                                                       |
|  | H3107D10   | 0.0143                        | BC038167       | Mm.347681      | CDNA sequence BC038167                                                                           |
|  | H3027D05   | 0.0143                        | Ly6e           | Mm.788         | Lymphocyte antigen 6 complex, locus E                                                            |
|  | H3065F02   | 0.0144                        | data not found | Mm.209805      | NOD-derived CD11c +ve dendritic cells cDNA, RIKEN full-length enriched library, clone:F630046O13 |
|  | H3124E06   | 0.0145                        | Atf4           | Mm.641         | Activating transcription factor 4                                                                |
|  | H572398    | 0.0146                        | AI987662       | Mm.206911      | Expressed sequence AI987662                                                                      |
|  | H3147B04   | 0.0146                        | Fgfr2          | Mm.16340       | Fibroblast growth factor receptor 2                                                              |
|  | H3136E11   | 0.0146                        | Nr1d2          | Mm.26587       | Nuclear receptor subfamily 1, group D, member 2                                                  |
|  | H539681    | 0.0146                        | Zfp606         | Mm.98929       | Zinc finger protein 606                                                                          |
|  | H3147H06   | 0.0149                        | Cacybp         | Mm.10702       | Calcyclin binding protein                                                                        |
|  | H3103D06   | 0.0150                        | Tlk2           | Mm.126976      | Tousled-like kinase 2                                                                            |
|  | H420689    | 0.0151                        | Butr1          | Mm.22540       | Butyrophilin related 1                                                                           |
|  | H3074F11   | 0.0153                        | Lsm7           | Mm.379101      | LSM7 homolog, U6 small nuclear RNA associated                                                    |
|  | H3143E11   | 0.0153                        | Rab12          | Mm.248313      | RAB12, member RAS oncogene family                                                                |
|  | H3104H04   | 0.0154                        | data not found | Mm.430772      | Transcribed locus                                                                                |
|  | H3115F06   | 0.0155                        | Mrpl27         | Mm.34951       | Mitochondrial ribosomal protein L27                                                              |
|  | H3006G06   | 0.0158                        | Ctsz           | Mm.156919      | Cathepsin Z                                                                                      |
|  | H400572    | 0.0158                        | Pabpc1         | Mm.321828      | Poly A binding protein, cytoplasmic 1                                                            |
|  | H3073E12   | 0.0158                        | Rif1           | Mm.254530      | Rap1 interacting factor 1 homolog                                                                |
|  | H3082C12   | 0.0158                        | Spp1           | Mm.288474      | Secreted phosphoprotein 1                                                                        |
|  | H3108B03   | 0.0159                        | H13            | Mm.277327      | Histocompatibility 13                                                                            |
|  | H583388    | 0.0161                        | Cerk           | Mm.222685      | Ceramide kinase                                                                                  |
|  | H3142H12   | 0.0161                        | data not found | Mm.365349      | Transcribed locus                                                                                |
|  | H604175    | 0.0161                        | data not found | Mm.386480      | Transcribed locus                                                                                |
|  | H3100A10   | 0.0161                        | Dmxl2          | Mm.93636       | Dmx-like 2                                                                                       |
|  | H583180    | 0.0161                        | Stxbp3a        | Mm.316894      | Syntaxin binding protein 3A                                                                      |
|  | H3109F03   | 0.0162                        | Bcar1          | Mm.3758        | Breast cancer anti-estrogen resistance 1                                                         |
|  | H3137H10   | 0.0162                        | E130310K16Rik  | Mm.317473      | RIKEN cDNA E130310K16 gene                                                                       |
|  | H3143G11   | 0.0162                        | Pde8b          | Mm.100167      | Phosphodiesterase 8B                                                                             |
|  | H3128F04   | 0.0163                        | 5730406M06Rik  | Mm.100117      | RIKEN cDNA 5730406M06 gene                                                                       |
|  | H3150E03   | 0.0164                        | 4930518F03Rik  | Mm.70781       | RIKEN cDNA 4930518F03 gene                                                                       |
|  | H3119D12   | 0.0164                        | Osbpl1a        | Mm.259470      | Oxysterol binding protein-like 1A                                                                |
|  | H3141C05   | 0.0166                        | Lphn1          | Mm.260733      | Latrophilin 1                                                                                    |
|  | H598250    | 0.0167                        | 1700029I01Rik  | Mm.392861      | RIKEN cDNA 1700029I01 gene                                                                       |
|  | H3127D11   | 0.0167                        | Grid2          | Mm.425327      | Glutamate receptor, ionotropic, delta 2                                                          |
|  | H3008F09   | 0.0167                        | Slc25a10       | Mm.3991        | Solute carrier family 25 (mitochondrial carrier, dicarboxylate transporter), member 10           |
|  | H3019A12   | 0.0168                        | Hmox1          | Mm.276389      | Heme oxygenase (decycling) 1                                                                     |
|  | H3129F07   | 0.0168                        | Ptprk          | Mm.332303      | Protein tyrosine phosphatase, receptor type, K                                                   |
|  | H3110D12   | 0.0168                        | Ufd1l          | Mm.237594      | Ubiquitin fusion degradation 1 like                                                              |

|  | <b>NIA</b> | <b><math>\rho \leq</math></b> | <b>Common</b>  | <b>Unigene</b> | <b>Name</b>                                                                                                   |
|--|------------|-------------------------------|----------------|----------------|---------------------------------------------------------------------------------------------------------------|
|  | H3092F03   | 0.0169                        | Cd276          | Mm.5356        | CD276 antigen                                                                                                 |
|  | H3095H05   | 0.0170                        | Pscd3          | Mm.281003      | Pleckstrin homology, Sec7 and coiled-coil domains 3                                                           |
|  | H596106    | 0.0171                        | Ahdc1          | Mm.31816       | AT hook, DNA binding motif, containing 1                                                                      |
|  | H3158C03   | 0.0171                        | Ccdc72         | Mm.2395        | Coiled-coil domain containing 72                                                                              |
|  | H643775    | 0.0171                        | data not found | Mm.364882      | Transcribed locus                                                                                             |
|  | H3121B12   | 0.0171                        | Kcnj12         | Mm.4970        | Potassium inwardly-rectifying channel, subfamily J, member 12                                                 |
|  | H637856    | 0.0171                        | Rp2h           | Mm.288141      | Retinitis pigmentosa 2 homolog+E449                                                                           |
|  | H3027D09   | 0.0172                        | Marcksl1       | Mm.424974      | MARCKS-like 1                                                                                                 |
|  | H3081E12   | 0.0173                        | Wdr77          | Mm.5110        | WD repeat domain 77                                                                                           |
|  | H3012F03   | 0.0175                        | Glo1           | Mm.261984      | Glyoxalase 1                                                                                                  |
|  | H3024A10   | 0.0176                        | Tpp1           | Mm.20837       | Tripeptidyl peptidase I                                                                                       |
|  | H3026C06   | 0.0177                        | Abr            | Mm.258939      | Active BCR-related gene                                                                                       |
|  | H596699    | 0.0177                        | Dhx29          | Mm.35094       | DEAH (Asp-Glu-Ala-His) box polypeptide 29                                                                     |
|  | H3120G11   | 0.0177                        | Kcnab3         | Mm.232472      | Potassium voltage-gated channel, shaker-related subfamily, beta member 3                                      |
|  | H3073G12   | 0.0178                        | Klhl15         | Mm.238117      | Kelch-like 15                                                                                                 |
|  | H523193    | 0.0178                        | Prrg3          | Mm.25626       | Proline rich Gla (G-carboxyglutamic acid) 3 (transmembrane)                                                   |
|  | H3080C05   | 0.0182                        | Adam8          | Mm.15969       | A disintegrin and metallopeptidase domain 8                                                                   |
|  | H3144F06   | 0.0182                        | Afp            | Mm.381         | Adipose differentiation related protein                                                                       |
|  | H3085B11   | 0.0182                        | Bola2          | Mm.358692      | BolA-like 2                                                                                                   |
|  | H3157C09   | 0.0182                        | Casp6          | Mm.281379      | Caspase 6                                                                                                     |
|  | H3134E05   | 0.0182                        | Cntn4          | Mm.321683      | Contactin 4                                                                                                   |
|  | H573537    | 0.0182                        | Zdhhc16        | Mm.20387       | Zinc finger, DHHC domain containing 16                                                                        |
|  | H657439    | 0.0183                        | Mlc1           | Mm.32780       | Megalencephalic leukoencephalopathy with subcortical cysts 1 homolog                                          |
|  | H3138D11   | 0.0185                        | Adam10         | Mm.431099      | A disintegrin and metallopeptidase domain 10                                                                  |
|  | H3155B11   | 0.0185                        | Chrac1         | Mm.23095       | Chromatin accessibility complex 1                                                                             |
|  | H3039G11   | 0.0185                        | Exph5          | Mm.390155      | Exophilin 5                                                                                                   |
|  | H3074C02   | 0.0186                        | Abhd3          | Mm.273108      | Abhydrolase domain containing 3                                                                               |
|  | H3084H06   | 0.0186                        | Cdc14b         | Mm.25335       | CDC14 cell division cycle 14 homolog B                                                                        |
|  | H3080H03   | 0.0186                        | Crip3          | Mm.25168       | Cysteine-rich protein 3                                                                                       |
|  | H3026F02   | 0.0186                        | Gpx1           | Mm.1090        | Glutathione peroxidase 1                                                                                      |
|  | H3073F05   | 0.0186                        | Serbp1         | Mm.240490      | Serpine1 mRNA binding protein 1                                                                               |
|  | H598948    | 0.0188                        | Cav2           | Mm.396075      | Caveolin 2                                                                                                    |
|  | H617662    | 0.0188                        | data not found | Mm.384414      | Transcribed locus                                                                                             |
|  | H534171    | 0.0188                        | Pxmp3          | Mm.132336      | Peroxisomal membrane protein 3                                                                                |
|  | H3126D03   | 0.0189                        | Adrbk2         | Mm.285619      | Adrenergic receptor kinase, beta 2                                                                            |
|  | H3056D05   | 0.0189                        | data not found | Mm.392275      | Transcribed locus, weakly similar to XP_921847.1 similar to Retrovirus-related Pol polyprotein (Endonuclease) |
|  | H644827    | 0.0189                        | data not found | Mm.393161      | Transcribed locus                                                                                             |
|  | H3117G11   | 0.0189                        | Eid1           | Mm.425101      | EP300 interacting inhibitor of differentiation 1                                                              |
|  | H3153D01   | 0.0190                        | 2210010A19Rik  | Mm.171484      | RIKEN cDNA 2210010A19 gene                                                                                    |
|  | H3096D02   | 0.0191                        | Fat4           | Mm.316210      | FAT tumor suppressor homolog 4+E482                                                                           |

|  | <b>NIA</b> | <b><math>\rho \leq</math></b> | <b>Common</b>  | <b>Unigene</b> | <b>Name</b>                                                                                   |
|--|------------|-------------------------------|----------------|----------------|-----------------------------------------------------------------------------------------------|
|  | H3111A06   | 0.0192                        | Rpl22          | Mm.426317      | Ribosomal protein L22                                                                         |
|  | H3107F05   | 0.0192                        | Uqcrb          | Mm.379136      | Ubiquinol-cytochrome c reductase binding protein                                              |
|  | H3044H12   | 0.0193                        | Lace1          | Mm.89646       | Lactation elevated 1                                                                          |
|  | H3132F05   | 0.0193                        | Nsbp1          | Mm.298443      | Nucleosome binding protein 1                                                                  |
|  | H3143F12   | 0.0194                        | Ctps2          | Mm.2065        | Cytidine 5'-triphosphate synthase 2                                                           |
|  | H493659    | 0.0194                        | Srp19          | Mm.29452       | Signal recognition particle 19                                                                |
|  | H3024B07   | 0.0196                        | Igf2           | Mm.3862        | Insulin-like growth factor 2                                                                  |
|  | H3047B12   | 0.0199                        | Akap7          | Mm.179069      | A kinase (PRKA) anchor protein 7                                                              |
|  | H3107F11   | 0.0200                        | Dusp3          | Mm.392115      | Dual specificity phosphatase 3 (vaccinia virus phosphatase VH1-related)                       |
|  | H331202    | 0.0200                        | Dync1i1        | Mm.20893       | Dynein cytoplasmic 1 intermediate chain 1                                                     |
|  | H3115H06   | 0.0200                        | Ftl1           | Mm.30357       | Ferritin light chain 1                                                                        |
|  | H3134C05   | 0.0200                        | Mgp            | Mm.243085      | Matrix Gla protein                                                                            |
|  | H3093B05   | 0.0200                        | Rbm26          | Mm.291542      | RNA binding motif protein 26                                                                  |
|  | H658624    | 0.0203                        | 1110038F14Rik  | Mm.322968      | RIKEN cDNA 1110038F14 gene                                                                    |
|  | H3158A10   | 0.0203                        | Abi2           | Mm.212066      | Abl-interactor 2                                                                              |
|  | H555877    | 0.0203                        | Adamts10       | Mm.29304       | A disintegrin-like and metallopeptidase (repolysin type) with thrombospondin type 1 motif, 10 |
|  | H3141B11   | 0.0203                        | H2-K1          | Mm.33263       | Histocompatibility 2, K1, K region                                                            |
|  | H3158G12   | 0.0203                        | Mtl5           | Mm.209941      | Metallothionein-like 5, testis-specific (tesmin)                                              |
|  | H3155C06   | 0.0204                        | Cd24a          | Mm.29742       | CD24a antigen                                                                                 |
|  | H3120D06   | 0.0204                        | Wdr6           | Mm.335454      | WD repeat domain 6                                                                            |
|  | H3049H05   | 0.0206                        | Amot           | Mm.100068      | Angiomotin                                                                                    |
|  | H481408    | 0.0206                        | Cox8a          | Mm.14022       | Cytochrome c oxidase, subunit VIIIa                                                           |
|  | H3072B06   | 0.0207                        | data not found | Mm.383962      | Transcribed locus                                                                             |
|  | H3118D04   | 0.0207                        | Slc29a1        | Mm.29744       | Solute carrier family 29 (nucleoside transporters), member 1                                  |
|  | H3136D02   | 0.0207                        | Sorbs2         | Mm.211096      | Sorbin and SH3 domain containing 2                                                            |
|  | H3135H04   | 0.0209                        | Tst            | Mm.15312       | Thiosulfate sulfurtransferase, mitochondrial                                                  |
|  | H3155G10   | 0.0210                        | Myo1b          | Mm.3390        | Myosin IB                                                                                     |
|  | H3140D10   | 0.0211                        | Dgcr2          | Mm.254515      | DiGeorge syndrome critical region gene 2                                                      |
|  | H3151E09   | 0.0213                        | 2010109N14Rik  | Mm.260791      | RIKEN cDNA 2010109N14 gene                                                                    |
|  | H555816    | 0.0216                        | Tm6sf1         | Mm.221412      | Transmembrane 6 superfamily member 1                                                          |
|  | H3152D06   | 0.0217                        | Alas2          | Mm.302724      | Aminolevulinic acid synthase 2, erythroid                                                     |
|  | H3118D05   | 0.0217                        | Rps25          | Mm.292027      | Ribosomal protein S25                                                                         |
|  | H314426    | 0.0218                        | Cbr1           | Mm.26940       | Carbonyl reductase 1                                                                          |
|  | H3065E09   | 0.0219                        | Eftud1         | Mm.238020      | Elongation factor Tu GTP binding domain containing 1                                          |
|  | H3145D11   | 0.0219                        | Rps24          | Mm.16775       | Ribosomal protein S24                                                                         |
|  | H596829    | 0.0219                        | Tacc1          | Mm.308452      | Transforming, acidic coiled-coil containing protein 1                                         |
|  | H641371    | 0.0223                        | BC018507       | Mm.139738      | CDNA sequence BC018507                                                                        |
|  | H642164    | 0.0223                        | Gtf2f2         | Mm.20415       | General transcription factor IIF, polypeptide 2                                               |
|  | H3104F03   | 0.0223                        | Krt18          | Mm.22479       | Keratin 18                                                                                    |
|  | H635173    | 0.0223                        | Slc3a2         | Mm.4114        | Solute carrier family 3 (activators of dibasic and neutral amino acid transport), member 2    |

|   | <b>NIA</b> | <b><math>\rho \leq</math></b> | <b>Common</b>  | <b>Unigene</b> | <b>Name</b>                                                                            |
|---|------------|-------------------------------|----------------|----------------|----------------------------------------------------------------------------------------|
|   | H3124G03   | 0.0224                        | 1810007M14Rik  | Mm.347         | RIKEN cDNA 1810007M14 gene                                                             |
|   | H3142H05   | 0.0225                        | Tmem147        | Mm.27499       | Transmembrane protein 147                                                              |
|   | H621131    | 0.0227                        | 1700020O03Rik  | Mm.252967      | RIKEN cDNA 1700020O03 gene                                                             |
|   | H477897    | 0.0228                        | Epb4.1l1       | Mm.20852       | Erythrocyte protein band 4.1-like 1                                                    |
| ‡ | H3083C05   | 0.0228                        | Sp3            | Mm.124328      | Trans-acting transcription factor 3                                                    |
|   | H3057D12   | 0.0229                        | Rnf170         | Mm.291906      | Ring finger protein 170                                                                |
|   | H3142E03   | 0.0232                        | Hdac3          | Mm.20521       | Histone deacetylase 3                                                                  |
|   | H3066F01   | 0.0232                        | Rgs2           | Mm.28262       | Regulator of G-protein signaling 2                                                     |
|   | H3097B09   | 0.0233                        | Cd97           | Mm.334648      | CD97 antigen                                                                           |
|   | H3040F11   | 0.0233                        | Ifi30          | Mm.30241       | Interferon gamma inducible protein 30                                                  |
|   | H351947    | 0.0233                        | Lrrn1          | Mm.428543      | Leucine rich repeat protein 1, neuronal                                                |
|   | H3123F05   | 0.0233                        | Spint2         | Mm.295230      | Serine protease inhibitor, Kunitz type 2                                               |
|   | H595923    | 0.0233                        | Yy1            | Mm.3868        | YY1 transcription factor                                                               |
|   | H3114B11   | 0.0234                        | Rps6ka3        | Mm.328476      | Ribosomal protein S6 kinase polypeptide 3                                              |
|   | H316130    | 0.0235                        | Blmh           | Mm.399785      | Bleomycin hydrolase                                                                    |
|   | H3124H05   | 0.0235                        | Inadl          | Mm.90218       | InaD-like+E538                                                                         |
|   | H3113F06   | 0.0235                        | Rnh1           | Mm.279485      | Ribonuclease/angiogenin inhibitor 1                                                    |
|   | H3109B08   | 0.0236                        | Slc15a4        | Mm.28506       | Solute carrier family 15, member 4                                                     |
|   | H635726    | 0.0239                        | Itih2          | Mm.182043      | Inter-alpha trypsin inhibitor, heavy chain 2                                           |
|   | H3047D04   | 0.0243                        | Ccdc86         | Mm.294908      | Coiled-coil domain containing 86                                                       |
|   | H482752    | 0.0243                        | Icosl          | Mm.17819       | Icos ligand                                                                            |
|   | H400664    | 0.0245                        | Gng11          | Mm.25547       | Guanine nucleotide binding protein (G protein), gamma 11                               |
|   | H3075C08   | 0.0245                        | Klf4           | Mm.4325        | Kruppel-like factor 4 (gut)                                                            |
|   | H3111F12   | 0.0248                        | Cnot6          | Mm.247113      | CCR4-NOT transcription complex, subunit 6                                              |
|   | H3038H11   | 0.0248                        | EG210583       | Mm.327168      | Predicted gene, EG210583                                                               |
|   | H519072    | 0.0248                        | Xpr1           | Mm.266215      | Xenotropic and polytropic retrovirus receptor 1                                        |
|   | H597636    | 0.0250                        | data not found | Mm.386223      | Transcribed locus                                                                      |
|   | H3031C12   | 0.0251                        | Ndrp1          | Mm.30837       | N-myc downstream regulated gene 1                                                      |
|   | H3157B11   | 0.0252                        | Cbx5           | Mm.262059      | Chromobox homolog 5                                                                    |
|   | H3119D11   | 0.0252                        | Ifitm2         | Mm.379266      | Interferon induced transmembrane protein 2                                             |
|   | H3106B12   | 0.0252                        | LOC434459      | Mm.359230      | Similar to RIKEN cDNA 4930503E14                                                       |
|   | H575724    | 0.0252                        | Nxf1           | Mm.7271        | Nuclear RNA export factor 1 homolog                                                    |
| ‡ | H3118B10   | 0.0252                        | Ogt            | Mm.259191      | O-linked N-acetylglucosamine (GlcNAc) transferase+E555                                 |
|   | H3101F06   | 0.0252                        | Pum1           | Mm.34701       | Pumilio 1                                                                              |
|   | H3120F05   | 0.0252                        | Rapgef1        | Mm.298274      | Rap guanine nucleotide exchange factor (GEF) 1                                         |
|   | H3008E04   | 0.0252                        | Rps20          | Mm.21938       | Ribosomal protein S20                                                                  |
|   | H3003A10   | 0.0252                        | Tpppb          | Mm.30144       | Trophoblast specific protein beta                                                      |
|   | H579505    | 0.0254                        | Chic1          | Mm.42223       | Cysteine-rich hydrophobic domain 1                                                     |
|   | H3091E12   | 0.0254                        | data not found | Mm.432813      | Adult male liver tumor cDNA, RIKEN full-length enriched library, clone:C730024P13+E561 |
|   | H3104A05   | 0.0254                        | Gprk5          | Mm.279400      | G protein-coupled receptor kinase 5                                                    |

|  | <b>NIA</b> | <b><math>\rho \leq</math></b> | <b>Common</b>  | <b>Unigene</b> | <b>Name</b>                                                                                       |
|--|------------|-------------------------------|----------------|----------------|---------------------------------------------------------------------------------------------------|
|  | H3143C12   | 0.0254                        | Mov10          | Mm.1597        | Moloney leukemia virus 10                                                                         |
|  | H3019F11   | 0.0254                        | Ssu72          | Mm.294770      | Ssu72 RNA polymerase II CTD phosphatase homolog                                                   |
|  | H722882    | 0.0254                        | Tgfb1          | Mm.14455       | Transforming growth factor, beta induced                                                          |
|  | H620826    | 0.0256                        | 2810423E13Rik  | Mm.130610      | RIKEN cDNA 2810423E13 gene                                                                        |
|  | H3116G03   | 0.0256                        | Lasp1          | Mm.271967      | LIM and SH3 protein 1                                                                             |
|  | H386989    | 0.0256                        | Spr            | Mm.28393       | Sepiapterin reductase                                                                             |
|  | H556151    | 0.0256                        | Zmym3          | Mm.23458       | Zinc finger, MYM-type 3                                                                           |
|  | H3117E06   | 0.0257                        | D330038O06Rik  | Mm.41364       | RIKEN cDNA D330038O06 gene                                                                        |
|  | H3071C09   | 0.0257                        | Mkln1          | Mm.238038      | Muskelin 1, intracellular mediator containing kelch motifs                                        |
|  | H3105F04   | 0.0258                        | data not found | Mm.395177      | Transcribed locus                                                                                 |
|  | H3109D02   | 0.0259                        | 4930504E06Rik  | Mm.279287      | RIKEN cDNA 4930504E06 gene                                                                        |
|  | H3159B11   | 0.0261                        | Gng12          | Mm.234342      | Guanine nucleotide binding protein (G protein), gamma 12                                          |
|  | H3116H05   | 0.0261                        | Pias1          | Mm.306663      | Protein inhibitor of activated STAT 1                                                             |
|  | H3132C05   | 0.0261                        | Rasa3          | Mm.18517       | RAS p21 protein activator 3                                                                       |
|  | H3147H05   | 0.0261                        | Slc6a6         | Mm.395650      | Solute carrier family 6 (neurotransmitter transporter, taurine), member 6                         |
|  | H641049    | 0.0261                        | Thap2          | Mm.32314       | THAP domain containing, apoptosis associated protein 2                                            |
|  | H3133C12   | 0.0261                        | Xpnpep3        | Mm.410525      | X-prolyl aminopeptidase (aminopeptidase P) 3, putative                                            |
|  | H349037    | 0.0262                        | Yipf1          | Mm.29118       | Yip1 domain family, member 1                                                                      |
|  | H538045    | 0.0263                        | Apoc1          | Mm.182440      | Apolipoprotein C-I                                                                                |
|  | H3135A05   | 0.0264                        | Hmga2          | Mm.157190      | High mobility group AT-hook 2                                                                     |
|  | H3002D12   | 0.0264                        | Surf6          | Mm.245577      | Surfeit gene 6                                                                                    |
|  | H3142G05   | 0.0264                        | Tep1           | Mm.318736      | Telomerase associated protein 1                                                                   |
|  | H580033    | 0.0265                        | 2310008H09Rik  | Mm.334185      | RIKEN cDNA 2310008H09 gene                                                                        |
|  | H3156C06   | 0.0265                        | Acvr2a         | Mm.314338      | Activin receptor IIA                                                                              |
|  | H3123E06   | 0.0265                        | Ythdf3         | Mm.23834       | YTH domain family 3                                                                               |
|  | H3122G03   | 0.0267                        | 2010003J03Rik  | Mm.299167      | RIKEN cDNA 2010003J03 gene                                                                        |
|  | H3127G05   | 0.0267                        | Ppt1           | Mm.277719      | Palmitoyl-protein thioesterase 1                                                                  |
|  | H3080H12   | 0.0268                        | Cry1           | Mm.26237       | Cryptochrome 1 (photolyase-like)                                                                  |
|  | H3146F08   | 0.0269                        | Usp28          | Mm.21630       | Ubiquitin specific peptidase 28                                                                   |
|  | H3139C09   | 0.0270                        | D6Wsu116e      | Mm.28524       | DNA segment, Chr 6, Wayne State University 116, expressed                                         |
|  | H3148H03   | 0.0270                        | Xpo4           | Mm.202747      | Exportin 4                                                                                        |
|  | H3144H10   | 0.0272                        | Smarcc1        | Mm.85410       | SWI/SNF related, matrix associated, actin dependent regulator of chromatin, subfamily c, member 1 |
|  | H721683    | 0.0274                        | Ubl3           | Mm.21846       | Ubiquitin-like 3                                                                                  |
|  | H3081D05   | 0.0275                        | 1190005F20Rik  | Mm.289373      | RIKEN cDNA 1190005F20 gene                                                                        |
|  | H400580    | 0.0275                        | Etv5           | Mm.155708      | Ets variant gene 5                                                                                |
|  | H574982    | 0.0279                        | C330019G07Rik  | Mm.335866      | RIKEN cDNA C330019G07 gene                                                                        |
|  | H3036E10   | 0.0279                        | Cugbp2         | Mm.398543      | CUG triplet repeat, RNA binding protein 2                                                         |
|  | H373295    | 0.0281                        | Copg2as2       | Mm.22891       | Coatomer protein complex, subunit gamma 2, antisense 2                                            |
|  | H444424    | 0.0286                        | Ddit3          | Mm.110220      | DNA-damage inducible transcript 3                                                                 |
|  | H637576    | 0.0286                        | Phtf2          | Mm.86410       | Putative homeodomain transcription factor 2                                                       |

|  | <b>NIA</b> | <b><math>\rho \leq</math></b> | <b>Common</b>  | <b>Unigene</b> | <b>Name</b>                                                                           |
|--|------------|-------------------------------|----------------|----------------|---------------------------------------------------------------------------------------|
|  | H3140G01   | 0.0286                        | Timeless       | Mm.6458        | Timeless homolog                                                                      |
|  | H3120A04   | 0.0287                        | Cpne8          | Mm.290991      | Copine VIII                                                                           |
|  | H599126    | 0.0287                        | Myo9a          | Mm.249545      | Myosin IXa                                                                            |
|  | H385200    | 0.0289                        | Itm2c          | Mm.29870       | Integral membrane protein 2C                                                          |
|  | H3066F04   | 0.0292                        | Igfbp7         | Mm.157655      | Insulin-like growth factor binding protein 7                                          |
|  | H3147B05   | 0.0293                        | Smu1           | Mm.289929      | Smu-1 suppressor of mec-8 and unc-52 homolog                                          |
|  | H617765    | 0.0295                        | data not found | Mm.385334      | Transcribed locus                                                                     |
|  | H3138B04   | 0.0296                        | Arhgef17       | Mm.29954       | Rho guanine nucleotide exchange factor (GEF) 17                                       |
|  | H615477    | 0.0296                        | D10Ert610e     | Mm.272230      | DNA segment, Chr 10, ERATO Doi 610, expressed                                         |
|  | H3118F07   | 0.0296                        | Olfm1          | Mm.43278       | Olfactomedin 1                                                                        |
|  | H3122C06   | 0.0296                        | Spast          | Mm.19804       | Spastin                                                                               |
|  | H3056F03   | 0.0296                        | Tmem49         | Mm.390398      | Transmembrane protein 49                                                              |
|  | H3006C12   | 0.0297                        | Ctr9           | Mm.255858      | Ctr9, Paf1/RNA polymerase II complex component, homolog                               |
|  | H3061F05   | 0.0297                        | Nfkb1          | Mm.256765      | Nuclear factor of kappa light chain gene enhancer in B-cells 1, p105                  |
|  | H3140D11   | 0.0300                        | 5031439G07Rik  | Mm.323925      | RIKEN cDNA 5031439G07 gene                                                            |
|  | H583512    | 0.0300                        | Spna2          | Mm.204969      | Spectrin alpha 2                                                                      |
|  | H3133F10   | 0.0302                        | Nr2c2          | Mm.383196      | Nuclear receptor subfamily 2, group C, member 2                                       |
|  | H3119A11   | 0.0303                        | Eif4g3         | Mm.268903      | Eukaryotic translation initiation factor 4 gamma, 3                                   |
|  | H3096H06   | 0.0303                        | Hps4           | Mm.238043      | Hermansky-Pudlak syndrome 4 homolog+E621                                              |
|  | H573453    | 0.0303                        | Rsf1           | Mm.211743      | Remodeling and spacing factor 1                                                       |
|  | H635679    | 0.0306                        | Tgm2           | Mm.330731      | Transglutaminase 2, C polypeptide                                                     |
|  | H597548    | 0.0308                        | Fbxl11         | Mm.31941       | F-box and leucine-rich repeat protein 11                                              |
|  | H3149F06   | 0.0309                        | Chd4           | Mm.333388      | Chromodomain helicase DNA binding protein 4                                           |
|  | H3044F11   | 0.0309                        | Mtap4          | Mm.217318      | Microtubule-associated protein 4                                                      |
|  | H313276    | 0.0309                        | Rpl12          | Mm.250030      | Ribosomal protein L12                                                                 |
|  | H3136H09   | 0.0309                        | Sfxn3          | Mm.36169       | Sideroflexin 3                                                                        |
|  | H3023B02   | 0.0310                        | Vps13b         | Mm.309250      | Vacuolar protein sorting 13B+E766                                                     |
|  | H406857    | 0.0311                        | Trak1          | Mm.305318      | Trafficking protein, kinesin binding 1                                                |
|  | H608716    | 0.0311                        | Ucp2           | Mm.171378      | Uncoupling protein 2 (mitochondrial, proton carrier)                                  |
|  | H3133F12   | 0.0312                        | Ccnd2          | Mm.333406      | Cyclin D2                                                                             |
|  | H3107G05   | 0.0312                        | Gm323          | Mm.391006      | Gene model 323, (NCBI)                                                                |
|  | H577341    | 0.0312                        | Sri            | Mm.96211       | Sorcin                                                                                |
|  | H3048B01   | 0.0313                        | Fubp1          | Mm.278922      | Far upstream element (FUSE) binding protein 1                                         |
|  | H3139H05   | 0.0313                        | Rps23          | Mm.389421      | Ribosomal protein S23                                                                 |
|  | H3022B11   | 0.0314                        | 9230105E10Rik  | Mm.425502      | RIKEN cDNA 9230105E10 gene                                                            |
|  | H638093    | 0.0314                        | Ercc3          | Mm.282335      | Excision repair cross-complementing rodent repair deficiency, complementation group 3 |
|  | H3151D03   | 0.0318                        | Kif1b          | Mm.402393      | Kinesin family member 1B                                                              |
|  | H3093C06   | 0.0319                        | B3gntl1        | Mm.386847      | UDP-GlcNAc:betaGal beta-1,3-N-acetylglucosaminyltransferase-like 1                    |
|  | H642610    | 0.0319                        | Trim27         | Mm.32492       | Tripartite motif protein 27                                                           |
|  | H658857    | 0.0322                        | 2410091C18Rik  | Mm.104959      | RIKEN cDNA 2410091C18 gene                                                            |

|  | <b>NIA</b> | <b><math>\rho \leq</math></b> | <b>Common</b>  | <b>Unigene</b> | <b>Name</b>                                          |
|--|------------|-------------------------------|----------------|----------------|------------------------------------------------------|
|  | H3128G05   | 0.0322                        | Aff1           | Mm.6949        | AF4/FMR2 family, member 1                            |
|  | H3001D03   | 0.0324                        | AI428936       | Mm.227325      | Expressed sequence AI428936                          |
|  | H3140D05   | 0.0324                        | Enpp5          | Mm.30145       | Ectonucleotide pyrophosphatase/phosphodiesterase 5   |
|  | H3133D04   | 0.0324                        | Ndufv2         | Mm.2206        | NADH dehydrogenase (ubiquinone) flavoprotein 2       |
|  | H3012D05   | 0.0324                        | Yeats4         | Mm.233529      | YEATS domain containing 4                            |
|  | H3144F11   | 0.0326                        | Matr3          | Mm.215034      | Matrin 3                                             |
|  | H3022B06   | 0.0326                        | Triobp         | Mm.123714      | TRIO and F-actin binding protein                     |
|  | H3144A03   | 0.0327                        | 2210010B09Rik  | Mm.86627       | RIKEN cDNA 2210010B09 gene                           |
|  | H3118G11   | 0.0327                        | Klhl23         | Mm.138073      | Kelch-like 23                                        |
|  | H3096H05   | 0.0327                        | Stag1          | Mm.42135       | Stromal antigen 1                                    |
|  | H3150E11   | 0.0328                        | AW822216       | Mm.236454      | Expressed sequence AW822216                          |
|  | H3112F12   | 0.0329                        | 1810035L17Rik  | Mm.355701      | RIKEN cDNA 1810035L17 gene                           |
|  | H3085C06   | 0.0329                        | D17Ert657e     | Mm.372318      | DNA segment, Chr 17, ERATO Doi 657, expressed        |
|  | H662272    | 0.0330                        | Exoc3          | Mm.261859      | Exocyst complex component 3                          |
|  | H596223    | 0.0331                        | data not found | Mm.262757      | Transcribed locus                                    |
|  | H636050    | 0.0331                        | data not found | Mm.32452       | Transcribed locus                                    |
|  | H3131B11   | 0.0331                        | Glg1           | Mm.276271      | Golgi apparatus protein 1                            |
|  | H575876    | 0.0333                        | data not found | Mm.392224      | Transcribed locus                                    |
|  | H332401    | 0.0333                        | Dchs1          | Mm.334108      | Dachsous 1+E661                                      |
|  | H599174    | 0.0335                        | Macf1          | Mm.402299      | Microtubule-actin crosslinking factor 1              |
|  | H3102C12   | 0.0336                        | Arl6ip1        | Mm.29924       | ADP-ribosylation factor-like 6 interacting protein 1 |
|  | H537167    | 0.0336                        | Ttc14          | Mm.275710      | Tetratricopeptide repeat domain 14                   |
|  | H3150E05   | 0.0337                        | Rai12          | Mm.13430       | Retinoic acid induced 12                             |
|  | H3119A08   | 0.0338                        | Clic1          | Mm.29524       | Chloride intracellular channel 1                     |
|  | H582992    | 0.0340                        | Dleu2          | Mm.32886       | Deleted in lymphocytic leukemia, 2                   |
|  | H3128C05   | 0.0341                        | 6720457D02Rik  | Mm.343450      | RIKEN cDNA 6720457D02 gene                           |
|  | H3155H03   | 0.0342                        | Rpl3           | Mm.290771      | Ribosomal protein L3                                 |
|  | H3043G10   | 0.0344                        | Snrpa1         | Mm.22362       | Small nuclear ribonucleoprotein polypeptide A'       |
|  | H3012C11   | 0.0345                        | 2900026A02Rik  | Mm.160131      | RIKEN cDNA 2900026A02 gene                           |
|  | H3056C10   | 0.0345                        | Arid2          | Mm.17166       | AT rich interactive domain 2 (Arid-rfx like)         |
|  | H3055H05   | 0.0345                        | Carhsp1        | Mm.142095      | Calcium regulated heat stable protein 1              |
|  | H3115G11   | 0.0345                        | Evl            | Mm.238841      | Ena-vasodilator stimulated phosphoprotein            |
|  | H3129E12   | 0.0345                        | Gorasp2        | Mm.271950      | Golgi reassembly stacking protein 2                  |
|  | H3097B12   | 0.0345                        | Nt5c2          | Mm.248652      | 5'-nucleotidase, cytosolic II                        |
|  | H3125H06   | 0.0345                        | Rpl4           | Mm.280083      | Ribosomal protein L4                                 |
|  | H3135F12   | 0.0346                        | Crebl1         | Mm.4068        | CAMP responsive element binding protein-like 1       |
|  | H3077D10   | 0.0347                        | BC026590       | Mm.268148      | CDNA sequence BC026590                               |
|  | H573864    | 0.0348                        | Gm826          | Mm.291144      | Gene model 826, (NCBI)                               |
|  | H3124F10   | 0.0349                        | Pxmp2          | Mm.21853       | Peroxisomal membrane protein 2                       |
|  | H3105F06   | 0.0351                        | 2310039H08Rik  | Mm.358702      | RIKEN cDNA 2310039H08 gene                           |

|  | <b>NIA</b> | <b><math>\rho \leq</math></b> | <b>Common</b>  | <b>Unigene</b> | <b>Name</b>                                                         |
|--|------------|-------------------------------|----------------|----------------|---------------------------------------------------------------------|
|  | H3143B11   | 0.0351                        | Ccdc124        | Mm.295791      | Coiled-coil domain containing 124                                   |
|  | H3076D05   | 0.0351                        | Lrrc50         | Mm.432018      | Leucine rich repeat containing 50                                   |
|  | H3141H11   | 0.0352                        | Amhr2          | Mm.60331       | Anti-Mullerian hormone type 2 receptor                              |
|  | H3106E05   | 0.0355                        | data not found | Mm.272185      | Membrane-associated ring finger (C3HC4) 6                           |
|  | H637060    | 0.0356                        | Bclaf1         | Mm.294783      | BCL2-associated transcription factor 1                              |
|  | H635134    | 0.0357                        | Htr7           | Mm.254266      | 5-hydroxytryptamine (serotonin) receptor 7                          |
|  | H3103G06   | 0.0358                        | Rplp2          | Mm.432008      | Ribosomal protein, large P2                                         |
|  | H3146C12   | 0.0359                        | Lrp1           | Mm.271854      | Low density lipoprotein receptor-related protein 1                  |
|  | H3044E06   | 0.0359                        | Psme1          | Mm.830         | Proteasome (prosome, macropain) 28 subunit, alpha                   |
|  | H3107A11   | 0.0364                        | Abl1           | Mm.1318        | V-abl Abelson murine leukemia oncogene 1                            |
|  | H3138H10   | 0.0364                        | Ctsd           | Mm.231395      | Cathepsin D                                                         |
|  | H3123B01   | 0.0367                        | 6720475J19Rik  | Mm.273536      | RIKEN cDNA 6720475J19 gene                                          |
|  | H3034C12   | 0.0369                        | Arhgap29       | Mm.229287      | Rho GTPase activating protein 29                                    |
|  | H3131F02   | 0.0370                        | 2310045N01Rik  | Mm.644         | RIKEN cDNA 2310045N01 gene                                          |
|  | H3116E12   | 0.0370                        | Ceecam1        | Mm.296336      | Cerebral endothelial cell adhesion molecule 1                       |
|  | H3117F02   | 0.0370                        | Pde1a          | Mm.40678       | Phosphodiesterase 1A, calmodulin-dependent                          |
|  | H3103D05   | 0.0372                        | Cth            | Mm.28301       | Cystathionase (cystathionine gamma-lyase)                           |
|  | H3129H03   | 0.0373                        | Hadh           | Mm.260164      | Hydroxyacyl-Coenzyme A dehydrogenase                                |
|  | H403277    | 0.0374                        | R3hcc1         | Mm.27738       | R3H domain and coiled-coil containing 1                             |
|  | H3051B09   | 0.0374                        | Stxbp6         | Mm.285400      | Syntaxin binding protein 6 (amisyn)                                 |
|  | H533282    | 0.0378                        | Actr10         | Mm.29317       | ARP10 actin-related protein 10 homolog                              |
|  | H3019A03   | 0.0380                        | Jtb            | Mm.13912       | Jumping translocation breakpoint                                    |
|  | H618846    | 0.0380                        | Zdhhc15        | Mm.30574       | Zinc finger, DHHC domain containing 15                              |
|  | H3147E11   | 0.0382                        | Ptpfr          | Mm.29855       | Protein tyrosine phosphatase, receptor type, F                      |
|  | H721890    | 0.0382                        | Selpl          | Mm.332590      | Selectin, platelet (p-selectin) ligand                              |
|  | H3153F11   | 0.0386                        | Sltm           | Mm.22379       | SAFB-like, transcription modulator                                  |
|  | H3041A06   | 0.0387                        | Srpk2          | Mm.288728      | Serine/arginine-rich protein specific kinase 2                      |
|  | H3147C04   | 0.0388                        | Lamb1-1        | Mm.172674      | Laminin B1 subunit 1                                                |
|  | H3038H04   | 0.0388                        | Pnpla8         | Mm.54126       | Patatin-like phospholipase domain containing 8                      |
|  | H3004E01   | 0.0388                        | Tmem68         | Mm.212266      | Transmembrane protein 68                                            |
|  | H3087E01   | 0.0389                        | Anxa4          | Mm.259702      | Annexin A4                                                          |
|  | H3067D10   | 0.0391                        | BC014805       | Mm.207060      | CDNA sequence BC014805                                              |
|  | H3096D05   | 0.0391                        | Nipbl          | Mm.240329      | Nipped-B homolog                                                    |
|  | H3046H10   | 0.0391                        | Upf3b          | Mm.271160      | UPF3 regulator of nonsense transcripts homolog B                    |
|  | H3074D03   | 0.0392                        | 5730403B10Rik  | Mm.157648      | RIKEN cDNA 5730403B10 gene                                          |
|  | H366995    | 0.0392                        | H2-D1          | Mm.195061      | Histocompatibility 2, D region locus 1                              |
|  | H3049F05   | 0.0392                        | Rae1           | Mm.4113        | RAE1 RNA export 1 homolog                                           |
|  | H3044B02   | 0.0394                        | Slc2a3         | Mm.395108      | Solute carrier family 2 (facilitated glucose transporter), member 3 |
|  | H3146H06   | 0.0395                        | Slc44a2        | Mm.148425      | Solute carrier family 44, member 2                                  |
|  | H642492    | 0.0396                        | Asxl3          | Mm.392310      | Additional sex combs like 3                                         |

|   | <b>NIA</b> | <b><math>\rho \leq</math></b> | <b>Common</b> | <b>Unigene</b> | <b>Name</b>                                                                                       |
|---|------------|-------------------------------|---------------|----------------|---------------------------------------------------------------------------------------------------|
|   | H3004C12   | 0.0396                        | Nt5c3l        | Mm.28738       | 5'-nucleotidase, cytosolic III-like                                                               |
|   | H348447    | 0.0400                        | Zfp324        | Mm.133086      | Zinc finger protein 324                                                                           |
|   | H3010D11   | 0.0401                        | D19Wsu162e    | Mm.329895      | DNA segment, Chr 19, Wayne State University 162, expressed                                        |
|   | H3099F03   | 0.0401                        | Prei4         | Mm.211211      | Preimplantation protein 4                                                                         |
|   | H3032E12   | 0.0401                        | Rpl7          | Mm.379004      | Ribosomal protein L7                                                                              |
|   | H3132A04   | 0.0402                        | Fis1          | Mm.25849       | Fission 1 (mitochondrial outer membrane) homolog+E728                                             |
|   | H3134C12   | 0.0403                        | Oclrl         | Mm.210343      | Oculocerebrorenal syndrome of Lowe                                                                |
|   | H3015C04   | 0.0404                        | 0610038F07Rik | Mm.180063      | RIKEN cDNA 0610038F07 gene                                                                        |
|   | H3074E12   | 0.0404                        | Usp47         | Mm.16974       | Ubiquitin specific peptidase 47                                                                   |
|   | H3089H08   | 0.0408                        | 2600011C06Rik | Mm.46005       | RIKEN cDNA 2600011C06 gene                                                                        |
|   | H3016D03   | 0.0409                        | Stk10         | Mm.8235        | Serine/threonine kinase 10                                                                        |
|   | H3155H09   | 0.0410                        | lkbke         | Mm.386783      | Inhibitor of kappaB kinase epsilon                                                                |
|   | H3139G12   | 0.0410                        | Prkcm         | Mm.133719      | Protein kinase C, mu                                                                              |
|   | H3061D03   | 0.0411                        | Pcsk5         | Mm.3401        | Proprotein convertase subtilisin/kexin type 5                                                     |
|   | H3062H04   | 0.0411                        | Utx           | Mm.257498      | Ubiquitously transcribed tetratricopeptide repeat gene, X chromosome                              |
|   | H3137B11   | 0.0412                        | Mest          | Mm.335639      | Mesoderm specific transcript                                                                      |
|   | H3107F06   | 0.0412                        | Smarca2       | Mm.313303      | SWI/SNF related, matrix associated, actin dependent regulator of chromatin, subfamily a, member 2 |
| ‡ | H3123B05   | 0.0413                        | Hdac2         | Mm.19806       | Histone deacetylase 2                                                                             |
|   | H3146H05   | 0.0413                        | Taf5l         | Mm.291777      | TAF5-like RNA polymerase II, p300/CBP-associated factor (PCAF)-associated factor                  |
|   | H3039H10   | 0.0414                        | Lima1         | Mm.33207       | LIM domain and actin binding 1                                                                    |
|   | H3029D12   | 0.0415                        | 2610507B11Rik | Mm.237103      | RIKEN cDNA 2610507B11 gene                                                                        |
|   | H3010G06   | 0.0415                        | Capg          | Mm.18626       | Capping protein (actin filament), gelsolin-like                                                   |
|   | H3032B05   | 0.0416                        | Eif3s6        | Mm.289992      | Eukaryotic translation initiation factor 3, subunit 6                                             |
|   | H400025    | 0.0416                        | Grin1         | Mm.278672      | Glutamate receptor, ionotropic, NMDA1 (zeta 1)                                                    |
|   | H372403    | 0.0417                        | Cnm3          | Mm.256323      | Cyclin M3                                                                                         |
|   | H3675547   | 0.0418                        | Tnfrsf1a      | Mm.1258        | Tumor necrosis factor receptor superfamily, member 1a                                             |
|   | H3099H11   | 0.0419                        | Myo1d         | Mm.151948      | Myosin ID                                                                                         |
|   | H3076C07   | 0.0419                        | Slc35f2       | Mm.26159       | Solute carrier family 35, member F2                                                               |
|   | H3055E11   | 0.0421                        | Dtl           | Mm.189102      | Denticleless homolog                                                                              |
|   | H3142D02   | 0.0421                        | Usf1          | Mm.8           | Upstream transcription factor 1                                                                   |
|   | H3133F04   | 0.0422                        | Snrpd2        | Mm.29135       | Small nuclear ribonucleoprotein D2                                                                |
|   | H3064B04   | 0.0426                        | Apobec4       | Mm.158650      | Apolipoprotein B mRNA editing enzyme, catalytic polypeptide-like 4                                |
|   | H3113F05   | 0.0427                        | Fxyd6         | Mm.208287      | FXYD domain-containing ion transport regulator 6                                                  |
|   | H3113H05   | 0.0427                        | Snrpe         | Mm.249110      | Small nuclear ribonucleoprotein E                                                                 |
|   | H582903    | 0.0427                        | Tpr           | Mm.174256      | Translocated promoter region                                                                      |
|   | H3112B09   | 0.0428                        | Ankrd10       | Mm.12459       | Ankyrin repeat domain 10                                                                          |
|   | H3096G05   | 0.0430                        | BC048546      | Mm.259234      | CDNA sequence BC048546                                                                            |
|   | H581127    | 0.0431                        | Uqcrcs1       | Mm.181933      | Ubiquinol-cytochrome c reductase, Rieske iron-sulfur polypeptide 1                                |
|   | H3093H10   | 0.0432                        | EG627488      | Mm.339215      | Predicted gene, EG627488                                                                          |
|   | H3124G02   | 0.0436                        | 5730405I09Rik | Mm.376607      | RIKEN cDNA 5730405I09 gene                                                                        |

|  | <b>NIA</b> | <b><math>\rho \leq</math></b> | <b>Common</b>  | <b>Unigene</b> | <b>Name</b>                                                                                           |
|--|------------|-------------------------------|----------------|----------------|-------------------------------------------------------------------------------------------------------|
|  | H3156H04   | 0.0436                        | Atp5g3         | Mm.2966        | ATP synthase, H <sup>+</sup> transporting, mitochondrial F0 complex, subunit c (subunit 9), isoform 3 |
|  | H400429    | 0.0436                        | Hoxd9          | Mm.26544       | Homeo box D9                                                                                          |
|  | H3097F04   | 0.0437                        | 5730469M10Rik  | Mm.27227       | RIKEN cDNA 5730469M10 gene                                                                            |
|  | H406320    | 0.0437                        | Cx3cl1         | Mm.103711      | Chemokine (C-X3-C motif) ligand 1                                                                     |
|  | H3005D10   | 0.0437                        | Sema3e         | Mm.134093      | Sema domain, immunoglobulin domain (Ig), short basic domain, secreted, (semaphorin) 3E                |
|  | H3091B12   | 0.0440                        | Lrp6           | Mm.321990      | Low density lipoprotein receptor-related protein 6                                                    |
|  | H3021F03   | 0.0440                        | Tomm70a        | Mm.213292      | Translocase of outer mitochondrial membrane 70 homolog A                                              |
|  | H3110F02   | 0.0441                        | Cct7           | Mm.289900      | Chaperonin subunit 7 (eta)                                                                            |
|  | H619811    | 0.0443                        | 5830418K08Rik  | Mm.218317      | RIKEN cDNA 5830418K08 gene                                                                            |
|  | H3146A05   | 0.0444                        | 4732435N03Rik  | Mm.334569      | RIKEN cDNA 4732435N03 gene                                                                            |
|  | H3008D04   | 0.0444                        | Gtf3c1         | Mm.294173      | General transcription factor III C 1                                                                  |
|  | H3150H09   | 0.0444                        | Wac            | Mm.272685      | WW domain containing adaptor with coiled-coil                                                         |
|  | H3089H09   | 0.0446                        | Ern1           | Mm.340943      | Endoplasmic reticulum (ER) to nucleus signalling 1                                                    |
|  | H722038    | 0.0448                        | Ilf2           | Mm.272336      | Interleukin enhancer binding factor 2                                                                 |
|  | H3109D12   | 0.0452                        | Kctd4          | Mm.390712      | Potassium channel tetramerisation domain containing 4                                                 |
|  | H3081E06   | 0.0452                        | Spty2d1        | Mm.155687      | SPT2, Suppressor of Ty, domain containing 1                                                           |
|  | H3122D12   | 0.0455                        | 1700021C14Rik  | Mm.273330      | RIKEN cDNA 1700021C14 gene                                                                            |
|  | H636029    | 0.0455                        | data not found | Mm.83400       | Transcribed locus                                                                                     |
|  | H3156C03   | 0.0455                        | Ppm1d          | Mm.45609       | Protein phosphatase 1D magnesium-dependent, delta isoform                                             |
|  | H3140E06   | 0.0457                        | Cd151          | Mm.30246       | CD151 antigen                                                                                         |
|  | H599227    | 0.0459                        | Sh3kbp1        | Mm.286495      | SH3-domain kinase binding protein 1                                                                   |
|  | H312860    | 0.0459                        | Tcea3          | Mm.112         | Transcription elongation factor A (SII), 3                                                            |
|  | H3141A06   | 0.0460                        | Dgkq           | Mm.260921      | Diacylglycerol kinase, theta                                                                          |
|  | H425532    | 0.0462                        | Cic            | Mm.28833       | Capicua homolog+E786                                                                                  |
|  | H3138G08   | 0.0462                        | Slc25a37       | Mm.293635      | Solute carrier family 25, member 37                                                                   |
|  | H580104    | 0.0464                        | data not found | Mm.395447      | Transcribed locus                                                                                     |
|  | H351781    | 0.0466                        | 2610301G19Rik  | Mm.218284      | RIKEN cDNA 2610301G19 gene                                                                            |
|  | H636074    | 0.0468                        | 1110019K23Rik  | Mm.153030      | RIKEN cDNA 1110019K23 gene                                                                            |
|  | H3100C09   | 0.0468                        | Ankhd1         | Mm.24790       | Ankyrin repeat and KH domain containing 1                                                             |
|  | H336003    | 0.0468                        | Zfyve20        | Mm.290734      | Zinc finger, FYVE domain containing 20                                                                |
|  | H333933    | 0.0469                        | Cd300lf        | Mm.277387      | CD300 antigen like family member F                                                                    |
|  | H3064C06   | 0.0469                        | Gldc           | Mm.274852      | Glycine decarboxylase                                                                                 |
|  | H652862    | 0.0469                        | Mbd4           | Mm.259308      | Methyl-CpG binding domain protein 4                                                                   |
|  | H329500    | 0.0469                        | Ugcgl1         | Mm.392153      | UDP-glucose ceramide glucosyltransferase-like 1                                                       |
|  | H3131F12   | 0.0470                        | Stfa3          | Mm.327618      | Stefin A3                                                                                             |
|  | H3063B04   | 0.0473                        | Abpb           | Mm.110829      | Androgen binding protein beta                                                                         |
|  | H3135D12   | 0.0473                        | data not found | Mm.38450       | Septin 9                                                                                              |
|  | H583622    | 0.0474                        | AI450540       | Mm.358870      | Expressed sequence AI450540                                                                           |
|  | H3108C10   | 0.0474                        | Mylk           | Mm.33360       | Myosin, light polypeptide kinase                                                                      |
|  | H3013H11   | 0.0474                        | Ranbp1         | Mm.3752        | RAN binding protein 1                                                                                 |

|   | <b>NIA</b>                | <b><math>\rho \leq</math></b> | <b>Common</b>  | <b>Unigene</b> | <b>Name</b>                                                                              |
|---|---------------------------|-------------------------------|----------------|----------------|------------------------------------------------------------------------------------------|
|   | H3151E11                  | 0.0474                        | Shc1           | Mm.86595       | Src homology 2 domain-containing transforming protein C1                                 |
|   | H331592                   | 0.0475                        | data not found | Mm.385639      | Transcribed locus                                                                        |
|   | H3018B03                  | 0.0478                        | Mrpl12         | Mm.133851      | Mitochondrial ribosomal protein L12                                                      |
|   | H3013F11                  | 0.0478                        | Rest           | Mm.392264      | RE1-silencing transcription factor                                                       |
|   | H3079B11                  | 0.0478                        | Surb7          | Mm.26212       | SRB7 (suppressor of RNA polymerase B) homolog                                            |
|   | H477860                   | 0.0478                        | Tbx2           | Mm.287052      | T-box 2                                                                                  |
|   | H583371                   | 0.0484                        | Mical1         | Mm.290431      | Microtubule associated monooxygenase, calponin and LIM domain containing 1               |
|   | H3078H08                  | 0.0486                        | AU020206       | Mm.200422      | Expressed sequence AU020206                                                              |
|   | H3089E05                  | 0.0486                        | Etfdh          | Mm.28336       | Electron transferring flavoprotein, dehydrogenase                                        |
|   | H3143A06                  | 0.0486                        | Gnb2           | Mm.30141       | Guanine nucleotide binding protein, beta 2                                               |
|   | H3145F12                  | 0.0487                        | 2410002F23Rik  | Mm.274492      | RIKEN cDNA 2410002F23 gene                                                               |
|   | H3144D10                  | 0.0489                        | Col18a1        | Mm.4352        | Procollagen, type XVIII, alpha 1                                                         |
|   | H3143C11                  | 0.0493                        | Pan3           | Mm.320469      | PAN3 polyA specific ribonuclease subunit homolog                                         |
|   | H3144E04                  | 0.0493                        | Pnrc2          | Mm.29159       | Proline-rich nuclear receptor coactivator 2                                              |
|   | H313871                   | 0.0493                        | Ptpn14         | Mm.4498        | Protein tyrosine phosphatase, non-receptor type 14                                       |
|   | H721451                   | 0.0493                        | Trim10         | Mm.299155      | Tripartite motif protein 10                                                              |
|   | H557009                   | 0.0493                        | Ywhaz          | Mm.3360        | Tyrosine 3-monooxygenase/tryptophan 5-monooxygenase activation protein, zeta polypeptide |
|   | H3146H04                  | 0.0495                        | Fcho2          | Mm.23928       | FCH domain only 2                                                                        |
|   | H3096D12                  | 0.0496                        | 5730403M16Rik  | Mm.23838       | RIKEN cDNA 5730403M16 gene                                                               |
|   | H576800                   | 0.0496                        | data not found | Mm.30468       | Transcribed locus                                                                        |
|   | H3155F12                  | 0.0496                        | Eif3s3         | Mm.289800      | Eukaryotic translation initiation factor 3, subunit 3 (gamma)                            |
|   | H3135H11                  | 0.0496                        | Map1lc3a       | Mm.196239      | Microtubule-associated protein 1 light chain 3 alpha                                     |
|   | H3092E05                  | 0.0497                        | Aco2           | Mm.387042      | Aconitase 2, mitochondrial                                                               |
|   | H3149B05                  | 0.0497                        | Taf12          | Mm.331926      | TAF12 RNA polymerase II, TATA box binding protein (TBP)-associated factor                |
|   | H3084G06                  | 0.0498                        | Prpf4b         | Mm.10027       | PRP4 pre-mRNA processing factor 4 homolog B                                              |
|   | H3044A03                  | 0.0500                        | Crtap          | Mm.20904       | Cartilage associated protein                                                             |
|   |                           |                               |                |                |                                                                                          |
| ‡ | Detected in SAGE analysis |                               |                |                |                                                                                          |
