# Supplementary material for: Ovarian gene expression in the absence of FIGLA, an oocyte-specific transcription factor
Source: PubMed Central journal article supplement (PMC1906760; doi:10.1186/1471-213x-7-67), 2007-06-13
Supplement: 1471-213X-7-67-S7.pdf [file 1471-213X-7-67-S7.pdf]

**Additional file 7 – SAGE libraries: genes potentially up-regulated by FIGLA**

|   | <b>SAGE Tag</b> | <b><math>\rho \leq</math></b> | <b>Common</b>       | <b>Genbank</b> | <b>Unigene</b>       | <b>Normal Tags</b> | <b>Null Tags</b> |
|---|-----------------|-------------------------------|---------------------|----------------|----------------------|--------------------|------------------|
|   | ATCTTGTGAA      | 0.0000                        | Rps2                | NM_008503      | Mm.299566            | 121                | 0                |
|   | TACAAATGTG      | 0.0000                        | Eef1a1              | BC040689       | Mm.335315            | 50                 | 0                |
|   | ATGTTTTGTC      | 0.0000                        | Mrps24              | NM_026080      | Mm.7328              | 28                 | 0                |
| ▶ | GTTGTGCATC      | 0.0000                        | Dppa3               | NM_139218      | Mm.27982             | 28                 | 0                |
|   | ATTTCCGGAA      | 0.0000                        | Ube2d3              | data not found | Mm.49884             | 27                 | 0                |
| ▶ | AGGAGCCTGG      | 0.0000                        | Pou5f1              | NM_013633      | Mm.17031             | 26                 | 0                |
|   | ACCTCTTAGG      | 0.0000                        | Gtl2                | data not found | Mm.289645            | 26                 | 0                |
| ▶ | CTGTGGCTGG      | 0.0000                        |                     | AK087784       | Mm.31556             | 23                 | 0                |
|   | AGATAGGCC       | 0.0000                        | Col1a1              | data not found | Mm.277735            | 22                 | 0                |
|   | TCCTCAGCAT      | 0.0000                        | data not found      | data not found | Mm.387484, Mm.310479 | 22                 | 0                |
|   | TGACCCCCTC      | 0.0000                        | multiple annotation |                |                      | 22                 | 0                |
|   | ATGGATGCC       | 0.0000                        | Paox                | BC033913       | Mm.44197             | 21                 | 0                |
|   | ATTATAAAAA      | 0.0000                        | Nol7                | NM_023554      | Mm.279041            | 21                 | 0                |
| ▶ | ACATACAGTA      | 0.0000                        |                     | 2410146L05Rik  | Mm.26883             | 21                 | 0                |
|   | ATTGTTTGTG      | 0.0000                        | Clta                | NM_016760      | Mm.298875            | 20                 | 0                |
|   | ATGAGGCTCT      | 0.0000                        | Leprel2             | data not found | Mm.35708             | 20                 | 0                |
|   | ATAAATGAAA      | 0.0000                        | data not found      | NM_028030      | Mm.29148             | 18                 | 0                |
|   | TTGTTACGGA      | 0.0000                        | data not found      | BE199211       | Mm.296346            | 17                 | 0                |
|   | CAGTTGCCCC      | 0.0000                        | data not found      | data not found |                      | 17                 | 0                |
|   | AAGGAAGAGG      | 0.0000                        | Sp3                 | BC027797       | Mm.124328            | 16                 | 0                |
|   | ATAGAATAGC      | 0.0000                        | Tcf21               | NM_011545      | Mm.16497             | 16                 | 0                |
| ▶ | ATTAAACCAG      | 0.0000                        |                     | AK139812       | Mm.372896            | 16                 | 0                |
|   | TGTGCCCCAC      | 0.0000                        | Peg3                | data not found | Mm.7952              | 16                 | 0                |
|   | CGGCCCTACT      | 0.0000                        | data not found      | BG099818       | Mm.300002            | 15                 | 0                |
|   | ATGTAAAAAA      | 0.0000                        | data not found      | data not found | Mm.260009, Mm.361978 | 15                 | 0                |
|   | CTGTAGCAGC      | 0.0000                        | data not found      | data not found |                      | 15                 | 0                |
|   | ACTCTGGCCG      | 0.0001                        | Flna                | BB670893       | Mm.295533            | 14                 | 0                |
|   | GGCGTAGGT       | 0.0001                        | Hspa8               | NM_031165      | Mm.290774            | 14                 | 0                |
|   | ACAACGTAG       | 0.0001                        | lvns1abp            | data not found | Mm.33764             | 14                 | 0                |
|   | ATTTGACCCT      | 0.0001                        | Scamp5              | NM_020270      | 102278               | 14                 | 0                |
|   | CCCTTGCCCTC     | 0.0001                        | data not found      | data not found | Mm.123101, Mm.222496 | 14                 | 0                |
|   | AGTGTGTGCC      | 0.0001                        | data not found      | data not found | Mm.20943, Mm.242644  | 13                 | 0                |
|   | AATGCTAGAG      | 0.0003                        | Vbp1                | NM_011692      | Mm.8294              | 12                 | 0                |
|   | ATTTAACTGG      | 0.0003                        | Obrgrp              | BC004744       | Mm.4756              | 12                 | 0                |
|   | AAGCATCTGC      | 0.0003                        | Lum                 | NM_008524      | Mm.18888             | 12                 | 0                |
|   | AGAAGCTGGA      | 0.0003                        | Stxbp2              | NM_011503      | Mm.7247              | 12                 | 0                |
|   | GAGATGATTT      | 0.0003                        | Cri1                | NM_025613      | Mm.44244             | 12                 | 0                |
|   | GGCGTCATTG      | 0.0003                        | Siat9               | NM_011375      | Mm.38248             | 12                 | 0                |
|   | CTATAGCCAA      | 0.0003                        | Dtx2                | data not found | Mm.275574            | 12                 | 0                |
|   | TTTCTTCTGG      | 0.0003                        | data not found      | data not found | Mm.4419, Mm.323357   | 12                 | 0                |
|   | CTTCTGCACA      | 0.0003                        | data not found      | data not found | Mm.290953, Mm.378795 | 12                 | 0                |
| ▶ | ATCGAGGTGC      | 0.0005                        | Oas1h               | NM_145228      | Mm.115351            | 11                 | 0                |
|   | ATGACATTCC      | 0.0005                        | data not found      | NM_023191      | Mm.28437             | 11                 | 0                |
|   | CACCTCAGGC      | 0.0005                        | Mfap2               | NM_008546      | Mm.7386              | 11                 | 0                |
| ▶ | CCGCAGCTCT      | 0.0005                        | Padi6               | NM_153106      | Mm.271661            | 11                 | 0                |
|   | TATTAAAGAA      | 0.0005                        | Hdac2               | NM_008229      | Mm.19806             | 11                 | 0                |
|   | ACAAAGGTGG      | 0.0005                        | Rraga               | AK004955       | Mm.31178             | 11                 | 0                |
|   | AGCTTGCCAA      | 0.0005                        | data not found      | AK002397       | Mm.272687            | 11                 | 0                |
|   | TTTAAACAAT      | 0.0005                        | Ogt                 | AK075653       | Mm.259191            | 11                 | 0                |
|   | TCATTACGGG      | 0.0005                        | data not found      | data not found | Mm.220328, Mm.4480   | 11                 | 0                |
|   | TGATATTAAG      | 0.0005                        | Prdx1               | data not found | Mm.30929             | 11                 | 0                |

|   | <b>SAGE Tag</b>            | <b><math>\rho \leq</math></b> | <b>Common</b>        | <b>Genbank</b> | <b>Unigene</b>       | <b>Normal Tags</b> | <b>Null Tags</b> |
|---|----------------------------|-------------------------------|----------------------|----------------|----------------------|--------------------|------------------|
|   | ATGAACCACC                 | 0.0005                        | data not found       | data not found | Mm.32012, Mm.71498   | 11                 | 0                |
|   | CACACAATGG                 | 0.0005                        | data not found       | data not found | Mm.307022, Mm.234965 | 11                 | 0                |
|   | TCCCCACCAC                 | 0.0005                        | data not found       | data not found | Mm.252244, Mm.3815   | 11                 | 0                |
|   | TGTAACCAAG                 | 0.0000                        | Zp2                  | NM_011775      | Mm.6510              | 10                 | 0                |
| ▶ | CCCAGGCCCC                 | 0.0000                        |                      | BG074389       | Mm.300962            | 10                 | 0                |
|   | TGCATCCCCA                 | 0.0000                        | Akr1a4               | NM_021473      | Mm.30085             | 10                 | 0                |
|   | ATCAAAGCCC                 | 0.0000                        | data not found       | data not found | Mm.250030, Mm.378999 | 10                 | 0                |
|   | TAATAGAGAA                 | 0.0000                        | data not found       | data not found | Mm.29870, Mm.200373  | 10                 | 0                |
|   | ATATACATTT                 | 0.0000                        | data not found       | data not found | Mm.27090, Mm.29773   | 10                 | 0                |
|   | CTATTCTTTG                 | 0.0000                        | Tde1                 | data not found | Mm.218473            | 10                 | 0                |
|   | TCGGACGGA                  | 0.0000                        | data not found       | data not found |                      | 10                 | 0                |
|   | ACTAATTGAG                 | 0.0000                        | multiple annotations |                |                      | 10                 | 0                |
|   |                            |                               |                      |                |                      |                    |                  |
| ▶ | Genes highlighted in paper |                               |                      |                |                      |                    |                  |
