# Supplementary material for: Ovarian gene expression in the absence of FIGLA, an oocyte-specific transcription factor
Source: PubMed Central journal article supplement (PMC1906760; doi:10.1186/1471-213x-7-67), 2007-06-13
Supplement: 1471-213X-7-67-S8.pdf [file 1471-213X-7-67-S8.pdf]

**Additional file 8– SAGE libraries: genes potentially down-regulated by FIGLA**

|   | <b>SAGE Tag</b> | <b><math>\rho \leq</math></b> | <b>Common</b>  | <b>Genbank</b> | <b>Unigene</b> | <b>Normal Tags</b> | <b>Null Tags</b> |
|---|-----------------|-------------------------------|----------------|----------------|----------------|--------------------|------------------|
|   | GAGTACTGAG      | 0.0000                        | data not found | data not found |                | 0                  | 149              |
|   | TATCAGAGTG      | 0.0000                        | data not found | data not found |                | 0                  | 111              |
|   | ACCAATGCTT      | 0.0000                        | Tuba3          | NM_009446      | Mm.287784      | 0                  | 95               |
|   | TACGAAAGGG      | 0.0000                        | Fabp9          | NM_011598      | Mm.26654       | 0                  | 94               |
|   | AGCCAGGAGC      | 0.0000                        | Gsg1           | NM_010352      | Mm.272306      | 0                  | 75               |
|   | TTGAAGAAAG      | 0.0000                        | 4922502D21Rik  | NM_199034      | Mm.46114       | 0                  | 74               |
|   | CAAAATGAGA      | 0.0000                        | Fut8           |                | Mm.35628       | 0                  | 63               |
|   | TCTCTTGCTC      | 0.0000                        | Dnajb3         | NM_008299      | Mm.3075        | 0                  | 57               |
|   | GAACCGTATA      | 0.0000                        | data not found | data not found |                | 0                  | 51               |
|   | ACAGAAACAA      | 0.0000                        | Sdpr           | data not found | Mm.255909      | 0                  | 47               |
|   | TTTAGAAAAT      | 0.0000                        | I1C0003E20     | data not found | Mm.379869      | 0                  | 47               |
|   | CTCTTGCTCT      | 0.0000                        | Mxd3           | data not found | Mm.20350       | 0                  | 45               |
|   | TACTGGGGCT      | 0.0000                        | Jarid1c        | data not found | Mm.142655      | 0                  | 44               |
| ■ | CTACCTCTG       | 0.0000                        | Crisp2         | NM_009420      | Mm.1296        | 0                  | 40               |
|   | GAACCGGAAC      | 0.0000                        | Cypt4          | NM_173412      | Mm.46158       | 0                  | 39               |
| ■ | AATTATAAAT      | 0.0000                        | Cetn1          | data not found | Mm.195831      | 0                  | 38               |
|   | AGTGTCTTTA      | 0.0000                        | AL024210       | data not found | Mm.291504      | 0                  | 36               |
|   | CTTGCTATAC      | 0.0000                        | Gabra2         | data not found | Mm.5304        | 0                  | 35               |
|   | CTGTAAACAG      | 0.0000                        | data not found | data not found |                | 0                  | 35               |
|   | ACCCAAGTGC      | 0.0000                        | 4930571K11     | data not found | Mm.229259      | 0                  | 34               |
|   | GGGATGTGGC      | 0.0000                        | LOC435793      | data not found | Mm.373689      | 0                  | 34               |
|   | CCTAGGTGAG      | 0.0000                        | data not found | data not found |                | 0                  | 34               |
| ■ | AATACCAGAA      | 0.0000                        | Adam3          | NM_009619      | Mm.5168        | 0                  | 34               |
|   | AGCAATAAAG      | 0.0000                        | 4930412F15Rik  | NM_175517      | Mm.383283      | 0                  | 33               |
|   | CTAGTGAGAG      | 0.0000                        | data not found | data not found |                | 0                  | 33               |
|   | CTTCTCGCGC      | 0.0000                        | data not found | data not found |                | 0                  | 33               |
|   | AACAATTCAT      | 0.0000                        | 1700074P13Rik  | data not found | Mm.333010      | 0                  | 33               |
|   | CTAGGTCTCC      | 0.0000                        | data not found | data not found |                | 0                  | 32               |
|   | TTGCCGGCAA      | 0.0000                        | Ubiquitin B    | data not found | Mm.371592      | 0                  | 32               |
|   | AATACATCTA      | 0.0000                        | Sp8            | data not found | Mm.51682       | 0                  | 32               |
|   | AAAAACTCAT      | 0.0000                        | 1700027M21     | NM_025499      | Mm.358694      | 0                  | 31               |
|   | AGAAAAATGC      | 0.0000                        | Fhl4           | data not found | Mm.46163       | 0                  | 31               |
|   | CACCCAAAGG      | 0.0000                        | Osp94          | data not found | Mm.39330       | 0                  | 31               |
|   | CCCAACTGCA      | 0.0000                        | Sorcs3         | data not found | Mm.70980       | 0                  | 31               |
|   | AGTGAACCTC      | 0.0000                        | Kcnk4          | data not found | Mm.12894       | 0                  | 30               |
|   | CGGAATAGTA      | 0.0000                        | 1700010M22     | data not found | Mm.45377       | 0                  | 30               |
|   | GTGAACCTCC      | 0.0000                        | data not found | data not found |                | 0                  | 30               |
|   | AAAACCTATA      | 0.0000                        | data not found | data not found |                | 0                  | 29               |
|   | CCTTACTTAG      | 0.0000                        | data not found | data not found |                | 0                  | 29               |
|   | CAAGGCCAAG      | 0.0000                        | 1700061J05     | data not found | Mm.73222       | 0                  | 29               |
| ■ | CCGAAGGAGG      | 0.0000                        | Prm2           | data not found | Mm.325769      | 0                  | 29               |
|   | TGAGACAGGG      | 0.0000                        | 5730596K20     | data not found | Mm.264016      | 0                  | 28               |
|   | GTACATAGAA      | 0.0000                        | data not found | data not found |                | 0                  | 28               |
|   | AGTGTGTCTC      | 0.0000                        | 4933414G08     | data not found | Mm.247201      | 0                  | 28               |
|   | AATTGTCATG      | 0.0000                        | data not found | data not found |                | 0                  | 27               |
|   | CAAAGTTACC      | 0.0000                        | 1700023A16     | data not found | Mm.252733      | 0                  | 27               |
|   | CATTATGAAA      | 0.0000                        | data not found | data not found |                | 0                  | 26               |
|   | CTGTAATAGT      | 0.0000                        | data not found | data not found |                | 0                  | 26               |
|   | CAGGACGCGC      | 0.0000                        | Tmsb10         | data not found | Mm.3532        | 0                  | 26               |
|   | GAGAAGCAGA      | 0.0000                        | data not found | data not found |                | 0                  | 25               |

|   | <b>SAGE Tag</b> | <b><math>\rho \leq</math></b> | <b>Common</b>  | <b>Genbank</b> | <b>Unigene</b> | <b>Normal Tags</b> | <b>Null Tags</b> |
|---|-----------------|-------------------------------|----------------|----------------|----------------|--------------------|------------------|
|   | AACTAATCAG      | 0.0000                        | Tpp2           | data not found | Mm.234139      | 0                  | 25               |
|   | CCATGCCTTG      | 0.0000                        | Cyp17a1        | NM_007809      | Mm.1262        | 0                  | 25               |
|   | TTTCACCTCC      | 0.0000                        | Txndc2         | NM_153519      | Mm.255732      | 0                  | 25               |
|   | GTGCAGGGTA      | 0.0000                        | data not found | data not found |                | 0                  | 24               |
|   | CCCTTCTCTC      | 0.0000                        | Asrgl1         | NM_025610      | Mm.272847      | 0                  | 24               |
|   | GTGGAAGGGC      | 0.0000                        | Gapdhs         | NM_008085      | Mm.374789      | 0                  | 24               |
|   | CAACCTATTC      | 0.0000                        | 1110018J18     | data not found | Mm.227240      | 0                  | 24               |
|   | AGCATCCAC       | 0.0000                        | 4930455B06     | XM_127913      | Mm.159281      | 0                  | 24               |
|   | CCCGCATCTT      | 0.0000                        | Irgc1          | NM_199013      | Mm.33811       | 0                  | 24               |
|   | AAAACCCTGT      | 0.0000                        | 1700051115     | data not found | Mm.271161      | 0                  | 24               |
| ■ | ATGAAGATGC      | 0.0000                        | Dkk1           | NM_015789      | Mm.27287       | 0                  | 24               |
|   | TCTTCTCGCG      | 0.0000                        | LOC545867      | data not found | Mm.380076      | 0                  | 24               |
|   | CAGGGGGATG      | 0.0000                        | Tcp10b         | data not found | Mm.264651      | 0                  | 24               |
| ■ | TAAGAAACAT      | 0.0000                        | Cypt12         | XM_619877      | Mm.27023       | 0                  | 23               |
|   | GTCATCACAT      | 0.0000                        | data not found | data not found |                | 0                  | 23               |
|   | GCCAGGAGCT      | 0.0000                        | data not found | data not found |                | 0                  | 23               |
|   | GACACCCAAG      | 0.0000                        | data not found | data not found |                | 0                  | 23               |
|   | CCTCCTTATT      | 0.0000                        | data not found | data not found |                | 0                  | 22               |
|   | GCATATGGAT      | 0.0000                        | data not found | data not found |                | 0                  | 22               |
|   | TCTGCTCACT      | 0.0000                        | Cklfsf2a       | NM_027022      | Mm.272746      | 0                  | 22               |
|   | AAAGACCCCC      | 0.0000                        | 1500006O09     | data not found | Mm.379105      | 0                  | 22               |
|   | GAACTATGGG      | 0.0000                        | LOC546598      | data not found | Mm.326801      | 0                  | 22               |
| ■ | ACGGCAGTCC      | 0.0000                        | Ldhc           | data not found | Mm.16563       | 0                  | 22               |
|   | TTGGGGGAGG      | 0.0000                        | Dusp18         | data not found | Mm.32588       | 0                  | 22               |
|   | GTGTTGAAAG      | 0.0000                        | data not found | data not found |                | 0                  | 22               |
|   | CCACCCGATA      | 0.0000                        | 1700123L14     | NM_030107      | Mm.84977       | 0                  | 22               |
|   | CACTCTGAAA      | 0.0000                        | Ldhal6b        | NM_175349      | Mm.358813      | 0                  | 21               |
|   | CCACTGTCAC      | 0.0000                        | Slc2a3         | data not found | Mm.269857      | 0                  | 21               |
|   | TGTGATGGTG      | 0.0000                        | Klk6           | NM_010639      | Mm.142722      | 0                  | 21               |
|   | TTAGAAGAAG      | 0.0000                        | Cdca7l         | data not found | Mm.281149      | 0                  | 21               |
|   | ACCTCCTTTG      | 0.0000                        | 1700016P04     | data not found | Mm.177847      | 0                  | 20               |
|   | CATCAGGATT      | 0.0000                        | Senp7          | data not found | Mm.255784      | 0                  | 20               |
|   | ACTTGCTATA      | 0.0000                        | Prdx6-rs1      | data not found | Mm.60992       | 0                  | 20               |
|   | CCTCTCCCAG      | 0.0000                        | Glul           | data not found | Mm.210745      | 0                  | 20               |
|   | AAAACATCAC      | 0.0000                        | Cdc2l6         | data not found | Mm.200924      | 0                  | 20               |
|   | TTGGACAATC      | 0.0000                        | TISP22         | data not found | Mm.326636      | 0                  | 20               |
|   | CTAGACAAGA      | 0.0000                        | Stx6           | data not found | Mm.66264       | 0                  | 20               |
|   | CTCCCTTCCC      | 0.0000                        | D830044I16     | data not found | Mm.304201      | 0                  | 20               |
|   | CTCATGGGTG      | 0.0000                        | Cklfsf2b       | NM_028524      | Mm.232593      | 0                  | 20               |
|   | CTTCTAATTA      | 0.0000                        | 2410015A16     | NM_029627      | Mm.273319      | 0                  | 19               |
|   | TGCAGAAGAA      | 0.0000                        | Lmo7           | data not found | Mm.218981      | 0                  | 19               |
|   | CAAGCTTCAG      | 0.0000                        | Spata19        | NM_029299      | Mm.45824       | 0                  | 19               |
|   | GTGTACAAGG      | 0.0000                        | 4933402P03     | NM_175368      | Mm.73263       | 0                  | 19               |
|   | CCTTAATACA      | 0.0000                        | 4930572D21     | XM_355845      | Mm.160043      | 0                  | 19               |
|   | AACAACCCAA      | 0.0000                        | Sf3a1          | data not found | Mm.156914      | 0                  | 19               |
|   | GTATTGTTCT      | 0.0000                        |                | data not found |                | 0                  | 19               |
|   | AAAAAGCCAA      | 0.0000                        | Nexn           | data not found | Mm.200188      | 0                  | 19               |
|   | CAGCGCAGCT      | 0.0000                        | 1700095G12     | XM_126335      | Mm.159159      | 0                  | 18               |
|   | ACCGTGCTGT      | 0.0000                        | 5730436H21     | data not found | Mm.29627       | 0                  | 18               |
| ■ | GGTAATTGCG      | 0.0000                        | Tnp1           | data not found | Mm.661         | 0                  | 18               |
| ■ | ACAGCCATCC      | 0.0000                        | Tisp78         | NM_144827      | Mm.156123      | 0                  | 18               |
|   | TCGTAGCTGC      | 0.0000                        | Gpd2 TISP38    | NM_010274      | Mm.3711        | 0                  | 18               |

|   | <b>SAGE Tag</b> | <b><math>\rho \leq</math></b> | <b>Common</b>          | <b>Genbank</b> | <b>Unigene</b> | <b>Normal Tags</b> | <b>Null Tags</b> |
|---|-----------------|-------------------------------|------------------------|----------------|----------------|--------------------|------------------|
|   | ACTGGGGCTG      | 0.0000                        | Ppil1                  | data not found | Mm.328928      | 0                  | 18               |
|   | GCCTCACAGG      | 0.0000                        | D10Wsu52e              | data not found | Mm.9257        | 0                  | 18               |
|   | CCCTTCCCTG      | 0.0000                        |                        | data not found |                | 0                  | 18               |
|   | CACGAGGAGG      | 0.0000                        | Fscn3                  | NM_019569      | Mm.31708       | 0                  | 18               |
|   | CTGCAGCCAT      | 0.0000                        | Hspb9                  | data not found | Mm.46175       | 0                  | 18               |
|   | TGTGAAAAGG      | 0.0000                        | 1700019M22             | NM_027076      | Mm.46121       | 0                  | 18               |
|   | ACTAGACAAG      | 0.0000                        | Mcsp                   | data not found | Mm.331192      | 0                  | 17               |
|   | ATCCAATGGG      | 0.0000                        | data not found         | data not found |                | 0                  | 17               |
|   | GTGTACCGTC      | 0.0000                        | data not found         | data not found |                | 0                  | 17               |
|   | GAACCCATTG      | 0.0000                        | 1700012L04             | data not found | Mm.327561      | 0                  | 17               |
|   | GGGCATCTAG      | 0.0000                        | Cign                   | NM_009904      | Mm.358581      | 0                  | 17               |
|   | ATGGCCCAGA      | 0.0000                        | Sdh1                   | NM_146126      | Mm.371580      | 0                  | 17               |
|   | GATTCAATAA      | 0.0000                        | data not found         | data not found |                | 0                  | 17               |
|   | GTGTAAATGG      | 0.0000                        | data not found         | data not found |                | 0                  | 17               |
|   | CCGAGTAGAG      | 0.0000                        | Meig1                  | data not found | Mm.2688        | 0                  | 17               |
|   | GCACCTAAGA      | 0.0000                        | Pgam2                  | NM_018870      | Mm.219627      | 0                  | 17               |
|   | CAATAAATGC      | 0.0000                        | data not found         | data not found |                | 0                  | 17               |
|   | AATATTGAAG      | 0.0000                        | 4930511111             | NM_026290      | Mm.46170       | 0                  | 17               |
|   | CTCACCATGT      | 0.0000                        | Rai14                  | data not found | Mm.212395      | 0                  | 17               |
|   | CTAAACTGAG      | 0.0000                        | data not found         | data not found |                | 0                  | 17               |
|   | AAAGAATCAC      | 0.0000                        | glycogen phosphorylase |                | Mm.183821      | 0                  | 17               |
|   | CTCACCTCTG      | 0.0000                        | Ropn1l                 | NM_145852      | Mm.309193      | 0                  | 16               |
|   | AACGAAGAAC      | 0.0000                        | Speer1-ps1             | XM_620159      | Mm.335888      | 0                  | 16               |
|   | CAGACAGTGG      | 0.0000                        | A630018P17             | data not found | Mm.336318      | 0                  | 16               |
|   | AAATGGACAC      | 0.0000                        | Tnp2                   | data not found | Mm.206798      | 0                  | 16               |
|   | CAAGAGAGCA      | 0.0000                        | 4930583C14             | NM_029472      | Mm.268996      | 0                  | 16               |
|   | CTCACAGGCC      | 0.0000                        | Ctsd                   | data not found | Mm.231395      | 0                  | 16               |
|   | ATACCAGAAG      | 0.0000                        | data not found         | data not found |                | 0                  | 16               |
|   | CTGCTGCAGA      | 0.0000                        | data not found         | data not found |                | 0                  | 16               |
|   | CAAGAGGCC       | 0.0000                        | CPN60                  | data not found | Mm.1777        | 0                  | 16               |
|   | TTGATGGAAC      | 0.0000                        | Gkrs2                  | NM_010294      | Mm.61206       | 0                  | 16               |
|   | GAAGGAAGAG      | 0.0000                        | Ppp1r3a                | data not found | Mm.209429      | 0                  | 16               |
|   | TTGGATACAG      | 0.0000                        | Kif2b                  | XM_126653      | Mm.67677       | 0                  | 16               |
|   | AACATGGAAG      | 0.0000                        | Csnb                   | data not found | Mm.268737      | 0                  | 16               |
|   | AAGAAACATC      | 0.0000                        | Bub3                   | data not found | Mm.927         | 0                  | 16               |
|   | CTATTCCTTT      | 0.0000                        | Papolb                 | NM_019943      | Mm.358676      | 0                  | 16               |
|   | CATGTGCCCC      | 0.0000                        | Pcd6ip                 | data not found | Mm.29816       | 0                  | 16               |
|   | GGGACCACGA      | 0.0000                        | data not found         | data not found |                | 0                  | 15               |
|   | AACGCAAGCT      | 0.0000                        | data not found         | data not found |                | 0                  | 15               |
| ■ | CTGAGAGGGG      | 0.0000                        | Dnahc8                 | NM_013811      | Mm.254797      | 0                  | 15               |
|   | TTCCAGGAGA      | 0.0000                        | Ubx3                   | NM_178671      | Mm.292226      | 0                  | 15               |
| ■ | TTATAAGGTG      | 0.0000                        | Odf1                   | NM_008757      | Mm.252830      | 0                  | 15               |
|   | AGCTCTCCTC      | 0.0000                        | Morc2b                 | NM_177719      | Mm.157765      | 0                  | 15               |
|   | AAACCTGTG       | 0.0000                        | I830058E16             | data not found | Mm.310642      | 0                  | 15               |
|   | CTTCCCAGGG      | 0.0000                        | Rps25                  | data not found | Mm.297486      | 0                  | 15               |
|   | CATCTCAAAG      | 0.0000                        | 1700001F22             | NM_027036      | Mm.331893      | 0                  | 15               |
| ■ | AAGTGACTGG      | 0.0000                        | Tcf15                  | NM_178254      | Mm.23379       | 0                  | 15               |
| ■ | ATCCTGCCCT      | 0.0000                        | Oaz3 TISP15            | NM_016901      | Mm.331200      | 0                  | 15               |
|   | ACTTCCCAGG      | 0.0000                        | Mkrm1                  | data not found | Mm.270484      | 0                  | 15               |
|   | GACTGAGGGT      | 0.0000                        | 1700093K21             | NM_026105      | Mm.87328       | 0                  | 15               |
|   | ACTCACAGGC      | 0.0000                        | D11Wsu68e              | data not found | Mm.301020      | 0                  | 15               |
|   | TGTTTGATAT      | 0.0001                        | Mk11 MKL               | NM_153049      | Mm.24862       | 0                  | 14               |

|   | <b>SAGE Tag</b> | <b><math>\rho \leq</math></b> | <b>Common</b>  | <b>Genbank</b> | <b>Unigene</b> | <b>Normal Tags</b> | <b>Null Tags</b> |
|---|-----------------|-------------------------------|----------------|----------------|----------------|--------------------|------------------|
|   | CACGAACTGG      | 0.0001                        | data not found | data not found |                | 0                  | 14               |
|   | AATACTCTGC      | 0.0001                        | data not found | data not found |                | 0                  | 14               |
|   | GCAGGAACCC      | 0.0001                        | data not found | data not found |                | 0                  | 14               |
|   | GTTGCCTGAT      | 0.0001                        | data not found | data not found |                | 0                  | 14               |
|   | AAACTATAAA      | 0.0001                        | 4933400N17     | data not found | Mm.380540      | 0                  | 14               |
|   | AAAATCGCAG      | 0.0001                        | Sqrdl          | NM_021507      | Mm.28986       | 0                  | 14               |
|   | CGGGCTTCTT      | 0.0001                        | Cyp11a1        | NM_019779      | Mm.302865      | 0                  | 14               |
|   | CTGAAAGACC      | 0.0001                        | Rnaseh2a       | data not found | Mm.182470      | 0                  | 14               |
|   | CCCCCAATTG      | 0.0001                        | Ctsb           | data not found | Mm.236553      | 0                  | 14               |
|   | CAAATCAGAA      | 0.0001                        | B4galt1        | data not found | Mm.15622       | 0                  | 14               |
|   | CTGCTCACAG      | 0.0001                        | Stk33          | XM_489715      | Mm.253614      | 0                  | 14               |
|   | AACTGAAGAA      | 0.0001                        | Rnf139         | data not found | Mm.4537        | 0                  | 14               |
|   | TAAGCACAAT      | 0.0001                        | Herc4          | data not found | Mm.234437      | 0                  | 14               |
|   | AATGTCGAGG      | 0.0001                        | Gkrs1          | NM_010293      | Mm.32242       | 0                  | 14               |
|   | TAAGGTTCCC      | 0.0001                        | data not found | data not found |                | 0                  | 14               |
|   | AGGGCACTGT      | 0.0001                        | 4930449C09     | data not found | Mm.148858      | 0                  | 14               |
|   | AACTCAAAGG      | 0.0001                        | 2510027N19     | data not found | Mm.4467        | 0                  | 14               |
|   | CTGCATTCTT      | 0.0001                        | LOC545951      | XM_622405      | Mm.212736      | 0                  | 13               |
|   | GTGTGTCTCC      | 0.0001                        | 1300007B12     | data not found | Mm.379087      | 0                  | 13               |
|   | CTAATATTTT      | 0.0001                        | D330027G24     | data not found | Mm.101339      | 0                  | 13               |
|   | TGTGTGCTGT      | 0.0001                        | Akr1c19        | data not found | Mm.22832       | 0                  | 13               |
|   | GATGCCATCA      | 0.0001                        | Dnmt3b6        | data not found | Mm.89772       | 0                  | 13               |
|   | CCCTTTTGCC      | 0.0001                        | Fbxo36         | NM_025386      | Mm.27888       | 0                  | 13               |
|   | GACCACAGCC      | 0.0001                        | Slc4a1         | data not found | Mm.7248        | 0                  | 13               |
|   | TTTGCAACTC      | 0.0001                        | data not found | data not found |                | 0                  | 13               |
|   | AAATTGAGAG      | 0.0001                        | 1810015C04     | data not found | Mm.25311       | 0                  | 13               |
|   | TAAGAGAAAG      | 0.0001                        |                | data not found |                | 0                  | 13               |
|   | AAACCAGGTG      | 0.0001                        | 4921533L14     | data not found | Mm.87130       | 0                  | 13               |
|   | AAATCTCACT      | 0.0001                        | 0610010D20     | data not found | Mm.24196       | 0                  | 13               |
|   | AAAGGATTGC      | 0.0001                        | data not found | data not found |                | 0                  | 13               |
|   | TGTGGAGGAA      | 0.0001                        | AV340375       | NM_001001295   | Mm.268341      | 0                  | 13               |
|   | CCTGTGAAAA      | 0.0001                        | Lancl3         | data not found | Mm.245119      | 0                  | 13               |
|   | TTTACAGTGT      | 0.0001                        | data not found | data not found |                | 0                  | 13               |
|   | AAAGAGAAAA      | 0.0001                        | Pbx3           | data not found | Mm.239941      | 0                  | 13               |
|   | TCCTTGTCAA      | 0.0001                        | data not found | data not found |                | 0                  | 13               |
|   | GCATCCCACT      | 0.0001                        | data not found | data not found |                | 0                  | 13               |
|   | GCTCTGTGGT      | 0.0001                        | data not found | data not found |                | 0                  | 13               |
|   | CTGTACATC       | 0.0001                        | data not found | data not found |                | 0                  | 13               |
|   | CCACCCCACT      | 0.0001                        | Ephx2          | NM_007940      | Mm.15295       | 0                  | 13               |
|   | TCCAGACCGT      | 0.0001                        | Dnajb1         | data not found | Mm.282092      | 0                  | 13               |
|   | TGCGGGTAGT      | 0.0001                        | Bnpl           | NM_001024841   | Mm.331209      | 0                  | 13               |
|   | CTGCTCACTG      | 0.0002                        | Plxnb3         | data not found | Mm.380177      | 0                  | 12               |
|   | CAGAAACAAT      | 0.0002                        | BC029103       | XM_621455      | Mm.34723       | 0                  | 12               |
|   | TTTGAGCATG      | 0.0002                        | data not found | data not found |                | 0                  | 12               |
| ■ | GGCTGCAGAC      | 0.0002                        | Tex101         | NM_019981      | Mm.23385       | 0                  | 12               |
|   | ATAAAGGGAA      | 0.0002                        | Tnfsf5         | data not found | Mm.4861        | 0                  | 12               |
|   | GAAAAATGCT      | 0.0002                        | data not found | data not found |                | 0                  | 12               |
|   | CTTGTGTTGA      | 0.0002                        | data not found | data not found |                | 0                  | 12               |
|   | CGCACTCGAA      | 0.0002                        | data not found | data not found |                | 0                  | 12               |
|   | ATCGAGTGTA      | 0.0002                        | Ube2n          | data not found | Mm.371667      | 0                  | 12               |
|   | GCAGAGATGT      | 0.0002                        | 4933409I22     | NM_172914      | Mm.248902      | 0                  | 12               |
|   | TTCAACAAGT      | 0.0002                        | Rsn            | NM_019765      | Mm.241109      | 0                  | 12               |

|   | <b>SAGE Tag</b> | <b><math>\rho \leq</math></b> | <b>Common</b>  | <b>Genbank</b> | <b>Unigene</b> | <b>Normal Tags</b> | <b>Null Tags</b> |
|---|-----------------|-------------------------------|----------------|----------------|----------------|--------------------|------------------|
|   | TTGTACTTTT      | 0.0002                        | Dncl2b         | NM_029297      | Mm.23114       | 0                  | 12               |
|   | CAGCGCATTG      | 0.0002                        | 1700006D24     | NM_027026      | Mm.250465      | 0                  | 12               |
|   | TGATGTGTTT      | 0.0002                        | 1700008K24     | data not found | Mm.46140       | 0                  | 12               |
|   | GTGCTATCAG      | 0.0002                        | 1700126L10     | data not found | Mm.374829      | 0                  | 12               |
|   | CAAAACACAC      | 0.0002                        | 4932419B04     | data not found | Mm.292354      | 0                  | 12               |
|   | GATACCGTCC      | 0.0002                        | data not found | data not found |                | 0                  | 12               |
|   | AAAAACATGA      | 0.0002                        | E430034L04     | data not found | Mm.290530      | 0                  | 12               |
|   | GATACTCTGC      | 0.0002                        | Tns            | XM_619639      | Mm.309975      | 0                  | 12               |
|   | GCTCTCCTCC      | 0.0002                        | Hba-x          | data not found | Mm.141758      | 0                  | 12               |
|   | CCTTCTCTCT      | 0.0002                        | D130072O21     | data not found | Mm.88364       | 0                  | 12               |
|   | GATGTGTCCT      | 0.0002                        | 1700010I14     | NM_025851      | Mm.67591       | 0                  | 12               |
|   | AAAAATAAAT      | 0.0002                        | 2300009A05     | data not found | Mm.113942      | 0                  | 12               |
|   | CACATCCGGT      | 0.0002                        | Adn            | data not found | Mm.4407        | 0                  | 12               |
|   | GGTTGAGGGG      | 0.0002                        | data not found | data not found |                | 0                  | 12               |
|   | GACATATGGA      | 0.0002                        | Dyrk3          | NM_145508      | Mm.39299       | 0                  | 12               |
|   | TGTTGAAGAG      | 0.0002                        | 4930431J08     | data not found | Mm.86986       | 0                  | 12               |
|   | GAAGCGTAAG      | 0.0002                        | data not found | data not found |                | 0                  | 12               |
|   | ACTGCTTGGG      | 0.0002                        | Mgmt MGMT      | data not found | Mm.71906       | 0                  | 12               |
|   | AGGTCCTCGT      | 0.0002                        | Rnf133         | NM_198251      | Mm.379572      | 0                  | 12               |
|   | AAGGTTCCCC      | 0.0002                        | data not found | data not found |                | 0                  | 12               |
|   | CCCGCCATGG      | 0.0002                        | 1700029H14     | NM_025601      | Mm.46136       | 0                  | 12               |
|   | GGTCCTCGTG      | 0.0002                        | data not found | data not found |                | 0                  | 12               |
|   | CTGCTGCTAT      | 0.0002                        | Miz1           | data not found | Mm.6370        | 0                  | 12               |
|   | AAATCAACTG      | 0.0002                        | 4932408B21     | data not found | Mm.61131       | 0                  | 12               |
|   | GGTAGAAATG      | 0.0002                        | Sas            | data not found | Mm.35650       | 0                  | 12               |
|   | TGGTACGGGT      | 0.0002                        | 1700009N14     | XM_131323      | Mm.23522       | 0                  | 12               |
|   | TTGTAAACCC      | 0.0002                        | data not found | data not found |                | 0                  | 12               |
|   | GGGGAATGGT      | 0.0002                        | data not found | data not found |                | 0                  | 12               |
|   | CACTGTCACC      | 0.0002                        | B230382K22     | data not found | Mm.41219       | 0                  | 12               |
|   | TCCATCCCTT      | 0.0002                        | Spr1a          | data not found | Mm.331191      | 0                  | 12               |
|   | AGACCTGTCT      | 0.0002                        | GAPDH          | data not found | Mm.370388      | 0                  | 12               |
| ■ | CACAAGAAAT      | 0.0004                        | Ppp3r2         | data not found | Mm.46125       | 0                  | 11               |
|   | CAGGCCTTGT      | 0.0004                        | Iqcf3          | data not found | Mm.141451      | 0                  | 11               |
|   | GTATGTATTT      | 0.0004                        | Fbxo41         | data not found | Mm.38777       | 0                  | 11               |
|   | GTATTTCAAT      | 0.0004                        | data not found | data not found |                | 0                  | 11               |
|   | CCAACGAGAA      | 0.0004                        | data not found | data not found |                | 0                  | 11               |
|   | GTCCCGGAAG      | 0.0004                        | data not found | data not found |                | 0                  | 11               |
| ■ | GCCGAGCTGC      | 0.0004                        | Sstk           | NM_032004      | Mm.379270      | 0                  | 11               |
|   | GGAGAATAAC      | 0.0004                        | Etf1           | data not found | Mm.329353      | 0                  | 11               |
|   | CCAACAATGT      | 0.0004                        | Tubb5          | data not found | Mm.273538      | 0                  | 11               |
|   | GGGCATTAGA      | 0.0004                        | 4933407P14     | data not found | Mm.117063      | 0                  | 11               |
| ■ | GTCAGCAACC      | 0.0004                        | Akap3          | NM_009650      | Mm.87748       | 0                  | 11               |
|   | TCCCCTTGCC      | 0.0004                        | 6430706D22     | data not found | Mm.386915      | 0                  | 11               |
| ■ | AGTATGTATT      | 0.0004                        | Crisp2         | data not found | Mm.1296        | 0                  | 11               |
|   | GACCCCCTTG      | 0.0004                        | data not found | data not found |                | 0                  | 11               |
| ■ | CGGTTGGTGA      | 0.0004                        | SP18           | XM_149824      | Mm.33683       | 0                  | 11               |
|   | CAGGAGATAA      | 0.0004                        | Cdv3 Pp36      | XM_135479      | Mm.261025      | 0                  | 11               |
|   | TCTGCATTCT      | 0.0004                        | data not found | data not found |                | 0                  | 11               |
|   | CTGTCACTTC      | 0.0004                        | Elavl2         | data not found | Mm.318042      | 0                  | 11               |
|   | TGACAAATGA      | 0.0004                        | Pvrl3          | NM_021495      | Mm.328072      | 0                  | 11               |
|   | TCTTAAGCAA      | 0.0004                        | 1700019B01     | data not found | Mm.307198      | 0                  | 11               |
|   | TAAAGAATCA      | 0.0004                        | Dpysl3         | data not found | Mm.8180        | 0                  | 11               |

|   | <b>SAGE Tag</b> | <b><math>\rho \leq</math></b> | <b>Common</b>  | <b>Genbank</b> | <b>Unigene</b> | <b>Normal Tags</b> | <b>Null Tags</b> |
|---|-----------------|-------------------------------|----------------|----------------|----------------|--------------------|------------------|
|   | AGTGAGAGAG      | 0.0004                        | 9630025C22     | data not found | Mm.54257       | 0                  | 11               |
|   | CCGGGGACAC      | 0.0004                        | Acs1           | NM_007981      | Mm.210323      | 0                  | 11               |
|   | GTTAGACCAC      | 0.0004                        | data not found | data not found |                | 0                  | 11               |
|   | ACCCAAGCCA      | 0.0004                        | Armc3          | XM_622876      | Mm.276696      | 0                  | 11               |
| ■ | AACCACAATG      | 0.0004                        | Tekt1          | NM_011569      | Mm.42257       | 0                  | 11               |
|   | GAAGGACACT      | 0.0004                        | data not found | data not found |                | 0                  | 11               |
|   | GATACTTACT      | 0.0004                        | data not found | data not found |                | 0                  | 11               |
|   | AAACCAACCC      | 0.0004                        | Hoxb9          | data not found | Mm.258271      | 0                  | 11               |
| ■ | ATGCATGTGA      | 0.0004                        | Hils1 TISP64   | NM_018792      | Mm.30482       | 0                  | 11               |
|   | GTTGAGAATT      | 0.0004                        | data not found | data not found |                | 0                  | 11               |
|   | GAAATGCGTC      | 0.0004                        | Tdrd6          | NM_198418      | Mm.329058      | 0                  | 11               |
|   | CGACACCAAG      | 0.0004                        | 9130403J09     | data not found | Mm.42767       | 0                  | 11               |
|   | GGGTTTACCT      | 0.0009                        | data not found | data not found |                | 0                  | 10               |
|   | TCTCTTCAGA      | 0.0009                        | Mjd            | data not found | Mm.271914      | 0                  | 10               |
|   | AGAAGGTTCA      | 0.0009                        | lqwd1          | data not found | Mm.227605      | 0                  | 10               |
|   | GTGCCTGGCG      | 0.0009                        | Siat5          | data not found | Mm.200388      | 0                  | 10               |
|   | AATGGACACA      | 0.0009                        | Mass1          | data not found | Mm.288694      | 0                  | 10               |
|   | GGGCAGAGAT      | 0.0009                        | data not found | data not found |                | 0                  | 10               |
| ■ | TGGTCCCTAG      | 0.0009                        | Ppp3r2         | data not found | Mm.46125       | 0                  | 10               |
|   | GGCCCTAAAG      | 0.0009                        | data not found | data not found |                | 0                  | 10               |
|   | GCTCCAACCC      | 0.0009                        | data not found | data not found |                | 0                  | 10               |
|   | CATAGTGTCT      | 0.0009                        | 1700013F07     | XM_131080      | Mm.271255      | 0                  | 10               |
|   | ACCACTGAAT      | 0.0009                        | XP_148894      | XM_148894      | Mm.301487      | 0                  | 10               |
|   | TGATGACTCA      | 0.0009                        | data not found | data not found |                | 0                  | 10               |
|   | TGGACAATCC      | 0.0009                        | data not found | data not found |                | 0                  | 10               |
|   | TGAAGATGCC      | 0.0009                        | data not found | data not found |                | 0                  | 10               |
|   | CCTGTAATG       | 0.0009                        | 2610205H19     | data not found | Mm.195625      | 0                  | 10               |
|   | CCTGCCCTCC      | 0.0009                        | 2510039O18     | data not found | Mm.183076      | 0                  | 10               |
|   | CCTGCCTCAG      | 0.0009                        | Sox17          | data not found | Mm.279103      | 0                  | 10               |
|   | CTTTAGATAG      | 0.0009                        | data not found | data not found |                | 0                  | 10               |
|   | GGCTCTTAAA      | 0.0009                        | data not found | data not found |                | 0                  | 10               |
|   | CGTCTGGGTC      | 0.0009                        | Act17a         | NM_009611      | Mm.30959       | 0                  | 10               |
|   | CATGCCTTGA      | 0.0009                        | data not found | data not found |                | 0                  | 10               |
|   | GGGAAGCAGA      | 0.0009                        | Sec14l4        | data not found | Mm.337476      | 0                  | 10               |
|   | CTTCATGAGG      | 0.0009                        | 1700034O15     | NM_029671      | Mm.272520      | 0                  | 10               |
|   | TCAACATGAG      | 0.0009                        | Ndufb4         | data not found | Mm.29065       | 0                  | 10               |
|   | GTCTGTGTGC      | 0.0009                        | data not found | data not found |                | 0                  | 10               |
|   | CAACAGAAGT      | 0.0009                        | 1700052H20     | data not found | Mm.307436      | 0                  | 10               |
|   | TAAGATAATC      | 0.0009                        | Enpp3          | data not found | Mm.338425      | 0                  | 10               |
|   | CACCCGATAT      | 0.0009                        | data not found | data not found |                | 0                  | 10               |
|   | ATCGGAAGGA      | 0.0009                        | Hsbp1          | data not found | Mm.358714      | 0                  | 10               |
|   | GTGATGGTAT      | 0.0009                        | data not found | data not found |                | 0                  | 10               |
|   | CTCTCCCACC      | 0.0009                        | Jmy            | data not found | Mm.100273      | 0                  | 10               |
|   | TCAACATGA       | 0.0009                        | Kcne3          | NM_020574      | Mm.282386      | 0                  | 10               |
|   | TCAAAGCCAA      | 0.0009                        | BC049635       | NM_177785      | Mm.212727      | 0                  | 10               |
|   | GTATTGATTT      | 0.0009                        | data not found | data not found |                | 0                  | 10               |
|   | TTAAGATAAT      | 0.0009                        | Sdh1           | data not found | Mm.371580      | 0                  | 10               |
|   | TCAACCTCTT      | 0.0009                        | Rnf151         | data not found | Mm.46159       | 0                  | 10               |
|   | CAATAAATGT      | 0.0009                        | 2410002F23     | data not found | Mm.274492      | 0                  | 10               |
|   | GCAGCACAGC      | 0.0009                        | 1700008D07     | XM_620533      | Mm.214841      | 0                  | 10               |
|   | TTTGAATAAC      | 0.0009                        | data not found | data not found |                | 0                  | 10               |
|   | TCCTTGGGCA      | 0.0009                        | data not found | data not found |                | 0                  | 10               |

|   | <b>SAGE Tag</b>       | <b><math>\rho \leq</math></b> | <b>Common</b>  | <b>Genbank</b> | <b>Unigene</b> | <b>Normal Tags</b> | <b>Null Tags</b> |
|---|-----------------------|-------------------------------|----------------|----------------|----------------|--------------------|------------------|
|   | GTAAATTGGC            | 0.0009                        | data not found | data not found |                | 0                  | 10               |
|   |                       |                               |                |                |                |                    |                  |
| ■ | Testis-specific genes |                               |                |                |                |                    |                  |
