# Supplementary material for: Ovarian gene expression in the absence of FIGLA, an oocyte-specific transcription factor
Source: PubMed Central journal article supplement (PMC1906760; doi:10.1186/1471-213x-7-67), 2007-06-13
Supplement: 1471-213X-7-67-S9.pdf [file 1471-213X-7-67-S9.pdf]

**Additional file 9 - Primers used for genotyping *Figla* null mice (5' - 3')**

|                               |                        |
|-------------------------------|------------------------|
| <i>Figla</i> Forward          | TGGCC CCTTCGTGGTACCACC |
| <i>Figla</i> Reverse - Normal | GGGCCTGTGAAGGGTCAGCCC  |
| <i>Figla</i> Reverse - Null   | CATTTGTCACGTCCTGCACGAC |

Conditions: 95°C 5 min, 94°C 30 sec, 60°C 30 sec, 72°C 30 sec for 28 cycles; 72°C 7 min
